# Supplementary material for: Seasonal differences in the testicular transcriptome profile of free-living European beavers (Castor fiber L.) determined by the RNA-Seq method
Source: PLoS One. 2017 Jul 5;12(7):e0180323. doi: 10.1371/journal.pone.0180323 (PMC5498055; doi:10.1371/journal.pone.0180323)
Supplement: S6 Table — The columns contain the following information: “Term”–names of terms in each database, “Database”–database name, “ID”–the id of terms in each database, “Input number”–number of assigned unigenes, “Background number”–number of all genes assigned to a given term in each database, “p-Value”,”Corrected p-Value”–statistical significance of enrichment, “Input”–short names of assigned DEGs. (XLS) [file pone.0180323.s007.xls]

## Sheet: KEGG Reactome
Term	Database	ID	Input number	Background number	P-Value	Corrected P-Value	Input
Proteoglycans in cancer	KEGG	hsa05205	4	203	0.000834904932081	0.376848857116	ERBB4; FLNC; FN1; HSPG2
Renin-angiotensin system	KEGG	hsa04614	2	23	0.00118289053341	0.376848857116	AGT; LNPEP
Salmonella infection	KEGG	hsa05132	2	86	0.0139108732541	0.376848857116	DYNC1H1; FLNC
ECM-receptor interaction	KEGG	hsa04512	2	87	0.0142123236151	0.376848857116	FN1; HSPG2
Vascular smooth muscle contraction	KEGG	hsa04270	2	120	0.0256743816141	0.376848857116	KCNMB2; PRKG1
Ribosome	KEGG	hsa03010	2	137	0.0326425720883	0.376848857116	RPL17; RPS27
cGMP-PKG signaling pathway	KEGG	hsa04022	2	167	0.0464987833933	0.376848857116	KCNMB2; PRKG1
Focal adhesion	KEGG	hsa04510	2	207	0.0676669088583	0.384104227651	FLNC; FN1
Vasopressin-regulated water reabsorption	KEGG	hsa04962	1	44	0.0876940420997	0.392703442468	DYNC1H1
Ether lipid metabolism	KEGG	hsa00565	1	45	0.089554550891	0.39749654824	UGT8
Sphingolipid metabolism	KEGG	hsa00600	1	47	0.0932644158351	0.402062161328	UGT8
Regulation of lipolysis in adipocytes	KEGG	hsa04923	1	56	0.109776225943	0.416926245562	PRKG1
Long-term depression	KEGG	hsa04730	1	60	0.117019842355	0.422993856427	PRKG1
Renin secretion	KEGG	hsa04924	1	64	0.124205665018	0.424615878649	AGT
Epithelial cell signaling in Helicobacter pylori infection	KEGG	hsa05120	1	68	0.131334145894	0.431647057906	PTPRZ1
Arrhythmogenic right ventricular cardiomyopathy (ARVC)	KEGG	hsa05412	1	74	0.141920331507	0.440579717026	DSG2
Bacterial invasion of epithelial cells	KEGG	hsa05100	1	78	0.148907412586	0.443367581152	FN1
Peroxisome	KEGG	hsa04146	1	83	0.157562864672	0.451162648338	FAR2
TGF-beta signaling pathway	KEGG	hsa04350	1	84	0.159283570103	0.452615237655	SMAD5
Insulin secretion	KEGG	hsa04911	1	85	0.161000829712	0.453225883138	KCNMB2
Small cell lung cancer	KEGG	hsa05222	1	86	0.162714650262	0.453225883138	FN1
ErbB signaling pathway	KEGG	hsa04012	1	87	0.164425038504	0.453393975326	ERBB4
Gap junction	KEGG	hsa04540	1	88	0.166132001173	0.45530495927	PRKG1
Salivary secretion	KEGG	hsa04970	1	89	0.167835544994	0.457034599094	PRKG1
Circadian entrainment	KEGG	hsa04713	1	95	0.177985387007	0.469184159357	PRKG1
Amoebiasis	KEGG	hsa05146	1	108	0.199562145098	0.49380113323	FN1
Platelet activation	KEGG	hsa04611	1	130	0.234818462587	0.511017195556	PRKG1
Osteoclast differentiation	KEGG	hsa04380	1	131	0.236384318393	0.511680672182	LILRA6
Signaling pathways regulating pluripotency of stem cells	KEGG	hsa04550	1	142	0.253402737228	0.5243491366	SMAD5
Hepatitis B	KEGG	hsa05161	1	146	0.259498596561	0.525485127962	HSPG2
Phagosome	KEGG	hsa04145	1	153	0.270049146944	0.533080903619	DYNC1H1
Calcium signaling pathway	KEGG	hsa04020	1	179	0.307962162555	0.558878104793	ERBB4
Herpes simplex infection	KEGG	hsa05168	1	184	0.315028521006	0.56143028454	HCFC1
Regulation of actin cytoskeleton	KEGG	hsa04810	1	214	0.35596491863	0.590273863123	FN1
MAPK signaling pathway	KEGG	hsa04010	1	255	0.408055353686	0.625316357926	FLNC
Endocytosis	KEGG	hsa04144	1	258	0.41170035211	0.627996176389	ERBB4
MicroRNAs in cancer	KEGG	hsa05206	1	297	0.457129328035	0.660011119021	SLC7A1i1
PI3K-Akt signaling pathway	KEGG	hsa04151	1	345	0.50834079211	0.688309884019	FN1
Pathways in cancer	KEGG	hsa05200	1	397	0.558478946397	0.720220566264	FN1
Olfactory transduction	KEGG	hsa04740	1	415	0.574638053144	0.730514056788	PRKG1
Metabolic pathways	KEGG	hsa01100	1	1234	0.924286109106	0.939195055813	UGT8
Apoptotic cleavage of cellular proteins	Reactome	R-HSA-111465	2	33	0.00597941291312	0.376848857116	BMX; DSG2
Apoptotic execution phase	Reactome	R-HSA-75153	2	46	0.0110220955614	0.376848857116	BMX; DSG2
Non-integrin membrane-ECM interactions	Reactome	R-HSA-3000171	2	57	0.0163277822883	0.376848857116	FN1; HSPG2
Loss of Nlp from mitotic centrosomes	Reactome	R-HSA-380259	2	59	0.017388531867	0.376848857116	PCM12; DYNC1H1
Loss of proteins required for interphase microtubule organization from the centrosome	Reactome	R-HSA-380284	2	59	0.017388531867	0.376848857116	PCM12; DYNC1H1
Organelle biogenesis and maintenance	Reactome	R-HSA-1852241	4	314	0.0215291584374	0.376848857116	PCM12; HCFC1; DYNC1H1; TNPO1
Assembly of the primary cilium	Reactome	R-HSA-5617833	3	178	0.0223288860133	0.376848857116	PCM12; DYNC1H1; TNPO1
Fibronectin matrix formation	Reactome	R-HSA-1566977	1	6	0.0228156624873	0.376848857116	FN1
Regulation of PLK1 Activity at G2/M Transition	Reactome	R-HSA-2565942	2	75	0.0268658375998	0.376848857116	PCM12; DYNC1H1
Centrosome maturation	Reactome	R-HSA-380287	2	76	0.0275139684734	0.376848857116	PCM12; DYNC1H1
Recruitment of mitotic centrosome proteins and complexes	Reactome	R-HSA-380270	2	76	0.0275139684734	0.376848857116	PCM12; DYNC1H1
Apoptotic cleavage of cell adhesion proteins	Reactome	R-HSA-351906	1	8	0.0292386246392	0.376848857116	DSG2
Integrin cell surface interactions	Reactome	R-HSA-216083	2	81	0.0308477111635	0.376848857116	FN1; HSPG2
Viral mRNA Translation	Reactome	R-HSA-192823	2	83	0.0322237641386	0.376848857116	RPL17; RPS27
Peptide chain elongation	Reactome	R-HSA-156902	2	83	0.0322237641386	0.376848857116	RPL17; RPS27
Ca2+ activated K+ channels	Reactome	R-HSA-1296052	1	9	0.0324343128594	0.376848857116	KCNMB2
Eukaryotic Translation Termination	Reactome	R-HSA-72764	2	84	0.0329207222224	0.376848857116	RPL17; RPS27
Anchoring of the basal body to the plasma membrane	Reactome	R-HSA-5620912	2	84	0.0329207222224	0.376848857116	PCM12; DYNC1H1
Nonsense Mediated Decay (NMD) independent of the Exon Junction Complex (EJC)	Reactome	R-HSA-975956	2	87	0.035046768214	0.376848857116	RPL17; RPS27
Eukaryotic Translation Elongation	Reactome	R-HSA-156842	2	87	0.035046768214	0.376848857116	RPL17; RPS27
Endosomal/Vacuolar pathway	Reactome	R-HSA-1236977	1	10	0.0356195183807	0.376848857116	LNPEP
Formation of a pool of free 40S subunits	Reactome	R-HSA-72689	2	92	0.0387046832014	0.376848857116	RPL17; RPS27
Defective EXT1 causes exostoses 1, TRPS2 and CHDS	Reactome	R-HSA-3656253	1	12	0.041958618269	0.376848857116	HSPG2
Defective EXT2 causes exostoses 2	Reactome	R-HSA-3656237	1	12	0.041958618269	0.376848857116	HSPG2
L13a-mediated translational silencing of Ceruloplasmin expression	Reactome	R-HSA-156827	2	100	0.0448426969796	0.376848857116	RPL17; RPS27
GRB2:SOS provides linkage to MAPK signaling for Integrins	Reactome	R-HSA-354194	1	13	0.045112580829	0.376848857116	FN1
Chylomicron-mediated lipid transport	Reactome	R-HSA-174800	1	13	0.045112580829	0.376848857116	HSPG2
GTP hydrolysis and joining of the 60S ribosomal subunit	Reactome	R-HSA-72706	2	101	0.0456337267377	0.376848857116	RPL17; RPS27
SRP-dependent cotranslational protein targeting to membrane	Reactome	R-HSA-1799339	2	104	0.0480374965168	0.376848857116	RPL17; RPS27
Nonsense Mediated Decay (NMD) enhanced by the Exon Junction Complex (EJC)	Reactome	R-HSA-975957	2	104	0.0480374965168	0.376848857116	RPL17; RPS27
Nonsense-Mediated Decay (NMD)	Reactome	R-HSA-927802	2	104	0.0480374965168	0.376848857116	RPL17; RPS27
p130Cas linkage to MAPK signaling for integrins	Reactome	R-HSA-372708	1	14	0.0482561970763	0.376848857116	FN1
Cap-dependent Translation Initiation	Reactome	R-HSA-72737	2	108	0.0513125515562	0.376848857116	RPL17; RPS27
Eukaryotic Translation Initiation	Reactome	R-HSA-72613	2	108	0.0513125515562	0.376848857116	RPL17; RPS27
Metabolism of Angiotensinogen to Angiotensins	Reactome	R-HSA-2022377	1	15	0.0513895008303	0.376848857116	AGT
Degradation of the extracellular matrix	Reactome	R-HSA-1474228	2	113	0.0555152211283	0.382621079313	FN1; HSPG2
G2/M Transition	Reactome	R-HSA-69275	2	114	0.0563698648502	0.384104227651	PCM12; DYNC1H1
Tristetraprolin (TTP, ZFP36) binds and destabilizes mRNA	Reactome	R-HSA-450513	1	17	0.0576253055858	0.384104227651	TNPO1
Defective B3GAT3 causes JDSSDHD	Reactome	R-HSA-3560801	1	17	0.0576253055858	0.384104227651	HSPG2
cGMP effects	Reactome	R-HSA-418457	1	17	0.0576253055858	0.384104227651	KCNMB2
Mitotic G2-G2/M phases	Reactome	R-HSA-453274	2	116	0.0580929442697	0.384104227651	PCM12; DYNC1H1
Cell-extracellular matrix interactions	Reactome	R-HSA-446353	1	18	0.0607278736768	0.384104227651	FLNC
Peroxisomal lipid metabolism	Reactome	R-HSA-390918	1	18	0.0607278736768	0.384104227651	FAR2
Defective B4GALT7 causes EDS, progeroid type	Reactome	R-HSA-3560783	1	18	0.0607278736768	0.384104227651	HSPG2
Defective B3GALT6 causes EDSP2 and SEMDJL1	Reactome	R-HSA-4420332	1	18	0.0607278736768	0.384104227651	HSPG2
Influenza Viral RNA Transcription and Replication	Reactome	R-HSA-168273	2	121	0.0624792735476	0.384104227651	RPL17; RPS27
Influenza Life Cycle	Reactome	R-HSA-168255	2	129	0.0697211046384	0.384104227651	RPL17; RPS27
Signaling by BMP	Reactome	R-HSA-201451	1	21	0.0699746410485	0.384104227651	SMAD5
HS-GAG degradation	Reactome	R-HSA-2024096	1	21	0.0699746410485	0.384104227651	HSPG2
Lipoprotein metabolism	Reactome	R-HSA-174824	1	22	0.0730366950851	0.384104227651	HSPG2
Common Pathway of Fibrin Clot Formation	Reactome	R-HSA-140875	1	22	0.0730366950851	0.384104227651	PRTN3
A tetrasaccharide linker sequence is required for GAG synthesis	Reactome	R-HSA-1971475	1	23	0.0760887032481	0.385264978625	HSPG2
Nitric oxide stimulates guanylate cyclase	Reactome	R-HSA-392154	1	23	0.0760887032481	0.385264978625	KCNMB2
Integrin alphaIIb beta3 signaling	Reactome	R-HSA-354192	1	24	0.0791306983783	0.388274166398	FN1
Translation	Reactome	R-HSA-72766	2	140	0.0800972996193	0.388274166398	RPL17; RPS27
Influenza Infection	Reactome	R-HSA-168254	2	140	0.0800972996193	0.388274166398	RPL17; RPS27
Apoptosis	Reactome	R-HSA-109581	2	147	0.0869333901724	0.392703442468	BMX; DSG2
Syndecan interactions	Reactome	R-HSA-3000170	1	27	0.0881969323776	0.394264958198	FN1
Programmed Cell Death	Reactome	R-HSA-5357801	2	150	0.0899150545932	0.39749654824	BMX; DSG2
Laminin interactions	Reactome	R-HSA-3000157	1	29	0.0941916204965	0.404107338271	HSPG2
Amino acid transport across the plasma membrane	Reactome	R-HSA-352230	1	30	0.0971742211204	0.408522849443	SLC7A1i1
HS-GAG biosynthesis	Reactome	R-HSA-2022928	1	30	0.0971742211204	0.408522849443	HSPG2
Platelet Aggregation (Plug Formation)	Reactome	R-HSA-76009	1	34	0.10900708181	0.416926245562	FN1
Diseases associated with glycosaminoglycan metabolism	Reactome	R-HSA-3560782	1	35	0.111941070725	0.416926245562	HSPG2
Molecules associated with elastic fibres	Reactome	R-HSA-2129379	1	37	0.117780198464	0.422993856427	FN1
Retinoid metabolism and transport	Reactome	R-HSA-975634	1	39	0.123581068751	0.424615878649	HSPG2
MAP2K and MAPK activation	Reactome	R-HSA-5674135	1	39	0.123581068751	0.424615878649	FN1
Formation of Fibrin Clot (Clotting Cascade)	Reactome	R-HSA-140877	1	39	0.123581068751	0.424615878649	PRTN3
Transcriptional activation of mitochondrial biogenesis	Reactome	R-HSA-2151201	1	39	0.123581068751	0.424615878649	HCFC1
Elastic fibre formation	Reactome	R-HSA-1566948	1	43	0.135069034424	0.437477017485	FN1
Chondroitin sulfate/dermatan sulfate metabolism	Reactome	R-HSA-1793185	1	45	0.140756624486	0.440579717026	HSPG2
Formation of the ternary complex, and subsequently, the 43S complex	Reactome	R-HSA-72695	1	47	0.146406946469	0.441986496011	RPS27
Mitochondrial biogenesis	Reactome	R-HSA-1592230	1	48	0.149218208035	0.443367581152	HCFC1
Lipid digestion, mobilization, and transport	Reactome	R-HSA-73923	1	49	0.152020243707	0.446799727768	HSPG2
@@Disease	Reactome	R-HSA-1643685	3	774	0.471742797461	0.667625128955	RPL17; RPS27; HSPG2
Translation initiation complex formation	Reactome	R-HSA-72649	1	52	0.160371296564	0.452615237655	RPS27
Heparan sulfate/heparin (HS-GAG) metabolism	Reactome	R-HSA-1638091	1	52	0.160371296564	0.452615237655	HSPG2
Intraflagellar transport	Reactome	R-HSA-5620924	1	52	0.160371296564	0.452615237655	TNPO1
Ribosomal scanning and start codon recognition	Reactome	R-HSA-72702	1	52	0.160371296564	0.452615237655	RPS27
Activation of the mRNA upon binding of the cap-binding complex and eIFs, and subsequent binding to 43S	Reactome	R-HSA-72662	1	53	0.163136729375	0.453393975326	RPS27
Ca2+ pathway	Reactome	R-HSA-4086398	1	60	0.182242285699	0.473545447075	PRKG1
Cell Cycle, Mitotic	Reactome	R-HSA-69278	3	458	0.195004695311	0.488592255977	PCM12; DYNC1H1; RPS27
Diseases of glycosylation	Reactome	R-HSA-3781865	1	65	0.195622413084	0.489438855436	HSPG2
Chromatin organization	Reactome	R-HSA-4839726	2	254	0.206430458989	0.4989061282	HCFC1; SMARCA2
Chromatin modifying enzymes	Reactome	R-HSA-3247509	2	254	0.206430458989	0.4989061282	HCFC1; SMARCA2
ECM proteoglycans	Reactome	R-HSA-3000178	1	70	0.208784381597	0.500305124538	FN1
Extracellular matrix organization	Reactome	R-HSA-1474244	2	260	0.213628773355	0.501605852589	FN1; HSPG2
Translocation of GLUT4 to the plasma membrane	Reactome	R-HSA-1445148	1	73	0.216578323363	0.503332300493	LNPEP
RMTs methylate histone arginines	Reactome	R-HSA-3214858	1	74	0.21915926587	0.504901202655	SMARCA2
Platelet homeostasis	Reactome	R-HSA-418346	1	76	0.224295760729	0.508178466761	KCNMB2
Antigen processing-Cross presentation	Reactome	R-HSA-1236975	1	76	0.224295760729	0.508178466761	LNPEP
Platelet degranulation	Reactome	R-HSA-114608	1	79	0.231937441999	0.509218366819	FN1
Regulation of mRNA stability by proteins that bind AU-rich elements	Reactome	R-HSA-450531	1	80	0.234467962685	0.511017195556	TNPO1
Peptide hormone metabolism	Reactome	R-HSA-2980736	1	81	0.236990175687	0.511957975216	AGT
Hemostasis	Reactome	R-HSA-109582	3	512	0.241121998447	0.515180928938	KCNMB2; PRTN3; FN1
Response to elevated platelet cytosolic Ca2+	Reactome	R-HSA-76005	1	83	0.242009787256	0.51566445733	FN1
Cell junction organization	Reactome	R-HSA-446728	1	85	0.246996493062	0.518105030976	FLNC
Amyloid formation	Reactome	R-HSA-977225	1	86	0.249477573529	0.522024677179	HSPG2
Visual phototransduction	Reactome	R-HSA-2187338	1	92	0.264193921179	0.529423084997	HSPG2
Transport of inorganic cations/anions and amino acids/oligopeptides	Reactome	R-HSA-425393	1	92	0.264193921179	0.529423084997	SLC7A1i1
Cell surface interactions at the vascular wall	Reactome	R-HSA-202733	1	96	0.273844719863	0.536567776774	FN1
Cell Cycle	Reactome	R-HSA-1640170	3	550	0.274566675342	0.53756900044	PCM12; DYNC1H1; RPS27
Potassium Channels	Reactome	R-HSA-1296071	1	98	0.278622715455	0.540079311091	KCNMB2
Signaling by Wnt	Reactome	R-HSA-195721	2	315	0.280268165806	0.540079311091	PRKG1; USP34
Infectious disease	Reactome	R-HSA-5663205	2	319	0.285123337417	0.540113199385	RPL17; RPS27
PPARA activates gene expression	Reactome	R-HSA-1989781	1	106	0.297423464235	0.552057021189	AGT
Resolution of Sister Chromatid Cohesion	Reactome	R-HSA-2500257	1	106	0.297423464235	0.552057021189	RPS27
Regulation of lipid metabolism by Peroxisome proliferator-activated receptor alpha (PPARalpha)	Reactome	R-HSA-400206	1	108	0.302046856437	0.555420890185	AGT
MHC class II antigen presentation	Reactome	R-HSA-2132295	1	109	0.304347171161	0.55746053023	DYNC1H1
Immunoregulatory interactions between a Lymphoid and a non-Lymphoid cell	Reactome	R-HSA-198933	1	111	0.308925161865	0.559434588448	NCR3LG1
Metabolism of lipids and lipoproteins	Reactome	R-HSA-556833	3	595	0.314714875008	0.56143028454	FAR2; AGT; HSPG2
Mitotic Prometaphase	Reactome	R-HSA-68877	1	114	0.315735920676	0.56143028454	RPS27
Glycosaminoglycan metabolism	Reactome	R-HSA-1630316	1	116	0.320239227327	0.565896132878	HSPG2
RHO GTPases Activate Formins	Reactome	R-HSA-5663220	1	120	0.329157435916	0.572165576912	RPS27
Cell-Cell communication	Reactome	R-HSA-1500931	1	129	0.348799425455	0.585223182998	FLNC
Metabolism of proteins	Reactome	R-HSA-392499	4	907	0.352455223745	0.587881648611	AGT; RPL17; RPS27; HSPG2
Adaptive Immune System	Reactome	R-HSA-1280218	3	638	0.353200480849	0.587881648611	NCR3LG1; DYNC1H1; LNPEP
Beta-catenin independent WNT signaling	Reactome	R-HSA-3858494	1	138	0.36786829255	0.597231253366	PRKG1
HATs acetylate histones	Reactome	R-HSA-3214847	1	139	0.36995240624	0.597813619767	HCFC1
Gastrin-CREB signalling pathway via PKC and MAPK	Reactome	R-HSA-881907	2	399	0.380669975723	0.606523515524	AGT; FN1
Separation of Sister Chromatids	Reactome	R-HSA-2467813	1	163	0.41796771317	0.630155331707	RPS27
Mitotic Anaphase	Reactome	R-HSA-68882	1	170	0.431272473551	0.64002537137	RPS27
Mitotic Metaphase and Anaphase	Reactome	R-HSA-2555396	1	171	0.433148250388	0.640949118195	RPS27
G alpha (q) signalling events	Reactome	R-HSA-416476	1	186	0.460556320399	0.662341119943	AGT
Peptide ligand-binding receptors	Reactome	R-HSA-375276	1	189	0.46587737219	0.665326678738	AGT
Fatty acid, triacylglycerol, and ketone body metabolism	Reactome	R-HSA-535734	1	203	0.490025627258	0.679867351546	AGT
GRB2 events in EGFR signaling	Reactome	R-HSA-179812	1	207	0.496723102518	0.683481501367	FN1
SHC1 events in EGFR signaling	Reactome	R-HSA-180336	1	207	0.496723102518	0.683481501367	FN1
SHC1 events in ERBB2 signaling	Reactome	R-HSA-1250196	1	207	0.496723102518	0.683481501367	FN1
GRB2 events in ERBB2 signaling	Reactome	R-HSA-1963640	1	207	0.496723102518	0.683481501367	FN1
SHC1 events in ERBB4 signaling	Reactome	R-HSA-1250347	1	207	0.496723102518	0.683481501367	FN1
RAF/MAP kinase cascade	Reactome	R-HSA-5673001	1	207	0.496723102518	0.683481501367	FN1
SOS-mediated signalling	Reactome	R-HSA-112412	1	207	0.496723102518	0.683481501367	FN1
FRS-mediated FGFR1 signaling	Reactome	R-HSA-5654693	1	208	0.498383731306	0.683481501367	FN1
FRS-mediated FGFR4 signaling	Reactome	R-HSA-5654712	1	208	0.498383731306	0.683481501367	FN1
FRS-mediated FGFR2 signaling	Reactome	R-HSA-5654700	1	208	0.498383731306	0.683481501367	FN1
FRS-mediated FGFR3 signaling	Reactome	R-HSA-5654706	1	208	0.498383731306	0.683481501367	FN1
MAPK1/MAPK3 signaling	Reactome	R-HSA-5684996	1	211	0.503332928991	0.686411893029	FN1
Signalling to p38 via RIT and RIN	Reactome	R-HSA-187706	1	211	0.503332928991	0.686411893029	FN1
ARMS-mediated activation	Reactome	R-HSA-170984	1	211	0.503332928991	0.686411893029	FN1
Frs2-mediated activation	Reactome	R-HSA-170968	1	212	0.504971824759	0.686470329295	FN1
Signaling by Leptin	Reactome	R-HSA-2586552	1	213	0.506605331702	0.687574221424	FN1
Prolonged ERK activation events	Reactome	R-HSA-169893	1	214	0.508233467476	0.688309884019	FN1
Antigen processing: Ubiquitination & Proteasome degradation	Reactome	R-HSA-983168	1	215	0.509856249678	0.688519345968	LNPEP
Interleukin receptor SHC signaling	Reactome	R-HSA-912526	1	216	0.511473695849	0.688698388777	FN1
Signalling to RAS	Reactome	R-HSA-167044	1	218	0.514692649977	0.691105324013	FN1
VEGFR2 mediated cell proliferation	Reactome	R-HSA-5218921	1	219	0.516294192729	0.691909984701	FN1
Platelet activation, signaling and aggregation	Reactome	R-HSA-76002	1	222	0.521067291324	0.695754080374	FN1
TCF dependent signaling in response to WNT	Reactome	R-HSA-201681	1	222	0.521067291324	0.695754080374	USP34
Interleukin-2 signaling	Reactome	R-HSA-451927	1	223	0.522647871635	0.695887094764	FN1
Signalling to ERKs	Reactome	R-HSA-187687	1	225	0.525793456036	0.695887094764	FN1
FCERI mediated MAPK activation	Reactome	R-HSA-2871796	1	229	0.532022794911	0.700866711276	FN1
G alpha (i) signalling events	Reactome	R-HSA-418594	1	231	0.535106818798	0.703118260876	AGT
Interleukin-3, 5 and GM-CSF signaling	Reactome	R-HSA-512988	1	231	0.535106818798	0.703118260876	FN1
MAPK family signaling cascades	Reactome	R-HSA-5683057	1	247	0.559060953495	0.720303340886	FN1
NCAM signaling for neurite out-growth	Reactome	R-HSA-375165	1	249	0.561967406257	0.722448797285	FN1
SLC-mediated transmembrane transport	Reactome	R-HSA-425407	1	251	0.564854768846	0.725100742423	SLC7A1i1
IRS-mediated signalling	Reactome	R-HSA-112399	1	252	0.566291330402	0.725454374668	FN1
Insulin receptor signalling cascade	Reactome	R-HSA-74751	1	255	0.570572722461	0.728013758768	FN1
Signaling by Type 1 Insulin-like Growth Factor 1 Receptor (IGF1R)	Reactome	R-HSA-2404192	1	256	0.571990473744	0.728013758768	FN1
IGF1R signaling cascade	Reactome	R-HSA-2428924	1	256	0.571990473744	0.728013758768	FN1
IRS-related events triggered by IGF1R	Reactome	R-HSA-2428928	1	256	0.571990473744	0.728013758768	FN1
Metabolism of carbohydrates	Reactome	R-HSA-71387	1	258	0.574811999319	0.730514056788	HSPG2
Class I MHC mediated antigen processing & presentation	Reactome	R-HSA-983169	1	259	0.576215804138	0.73193433243	LNPEP
Membrane Trafficking	Reactome	R-HSA-199991	1	260	0.577614990582	0.73325606361	LNPEP
Gene Expression	Reactome	R-HSA-74160	4	1248	0.59173532545	0.742791962286	ZNF697; TNPO1; RPL17; RPS27
Neuronal System	Reactome	R-HSA-112316	1	273	0.59539096378	0.744601374217	KCNMB2
Signaling by Insulin receptor	Reactome	R-HSA-74752	1	279	0.603341884938	0.746939786884	FN1
Signaling by SCF-KIT	Reactome	R-HSA-1433557	1	280	0.604651818423	0.746939786884	FN1
VEGFA-VEGFR2 Pathway	Reactome	R-HSA-4420097	1	282	0.607258767691	0.746939786884	FN1
Signaling by ERBB4	Reactome	R-HSA-1236394	1	283	0.608555811697	0.746939786884	FN1
Downstream signaling of activated FGFR1	Reactome	R-HSA-5654687	1	283	0.608555811697	0.746939786884	FN1
Downstream signaling of activated FGFR4	Reactome	R-HSA-5654716	1	283	0.608555811697	0.746939786884	FN1
Downstream signaling of activated FGFR2	Reactome	R-HSA-5654696	1	283	0.608555811697	0.746939786884	FN1
Downstream signaling of activated FGFR3	Reactome	R-HSA-5654708	1	283	0.608555811697	0.746939786884	FN1
Signaling by FGFR3	Reactome	R-HSA-5654741	1	286	0.612421389571	0.747384976092	FN1
Signaling by FGFR4	Reactome	R-HSA-5654743	1	286	0.612421389571	0.747384976092	FN1
Signaling by Interleukins	Reactome	R-HSA-449147	1	286	0.612421389571	0.747384976092	FN1
Signaling by FGFR1	Reactome	R-HSA-5654736	1	287	0.613701443984	0.748157105063	FN1
M Phase	Reactome	R-HSA-68886	1	289	0.616248928717	0.748625702899	RPS27
RHO GTPase Effectors	Reactome	R-HSA-195258	1	289	0.616248928717	0.748625702899	RPS27
Signaling by FGFR2	Reactome	R-HSA-5654738	1	289	0.616248928717	0.748625702899	FN1
Signaling by FGFR	Reactome	R-HSA-190236	1	290	0.617516386621	0.749757550138	FN1
Signaling by VEGF	Reactome	R-HSA-194138	1	291	0.618779673198	0.750934800364	FN1
Signaling by ERBB2	Reactome	R-HSA-1227986	1	294	0.622544641532	0.753358565261	FN1
Downstream signal transduction	Reactome	R-HSA-186763	1	295	0.623791379145	0.753519415261	FN1
Vesicle-mediated transport	Reactome	R-HSA-5653656	1	297	0.626272557701	0.755011282433	LNPEP
Signal Transduction	Reactome	R-HSA-162582	7	2277	0.627449808878	0.755237986705	PRKG1; FN1; RPS27; SMAD5; HSPG2; AGT; USP34
DAP12 signaling	Reactome	R-HSA-2424491	1	299	0.62873743019	0.755489477911	FN1
Immune System	Reactome	R-HSA-168256	4	1311	0.630165903412	0.756494936631	NCR3LG1; DYNC1H1; FN1; LNPEP
Signaling by EGFR	Reactome	R-HSA-177929	1	308	0.63963041561	0.760326826433	FN1
DAP12 interactions	Reactome	R-HSA-2172127	1	310	0.642007494881	0.761063126755	FN1
Class A/1 (Rhodopsin-like receptors)	Reactome	R-HSA-373076	1	311	0.643190168985	0.761773767254	AGT
Fc epsilon receptor (FCERI) signaling	Reactome	R-HSA-2454202	1	315	0.64788206033	0.76413027134	FN1
Signaling by PDGF	Reactome	R-HSA-186797	1	323	0.657082206927	0.769656071055	FN1
NGF signalling via TRKA from the plasma membrane	Reactome	R-HSA-187037	1	328	0.662710254717	0.77306118673	FN1
Signaling by Rho GTPases	Reactome	R-HSA-194315	1	397	0.73160098921	0.813703231583	RPS27
Signalling by NGF	Reactome	R-HSA-166520	1	403	0.736882897818	0.815583597625	FN1
GPCR ligand binding	Reactome	R-HSA-500792	1	436	0.764135230109	0.831500812614	AGT
Axon guidance	Reactome	R-HSA-422475	1	498	0.807957674891	0.860074800822	FN1
Cytokine Signaling in Immune system	Reactome	R-HSA-1280215	1	500	0.809227260716	0.860371769501	FN1
Generic Transcription Pathway	Reactome	R-HSA-212436	1	502	0.81048848302	0.861354551572	ZNF697
Transmembrane transport of small molecules	Reactome	R-HSA-382551	1	571	0.849266588856	0.883548064838	SLC7A1i1
Developmental Biology	Reactome	R-HSA-1266738	1	678	0.894350688754	0.915474263868	FN1
Metabolism	Reactome	R-HSA-1430728	3	1614	0.902569089855	0.922041215645	FAR2; AGT; HSPG2
Innate Immune System	Reactome	R-HSA-168249	1	707	0.904059542601	0.922138665123	FN1
Signaling by GPCR	Reactome	R-HSA-372790	2	1188	0.904107013478	0.922138665123	AGT; FN1
GPCR downstream signaling	Reactome	R-HSA-388396	1	905	0.950365774159	0.955973754731	AGT;

## Sheet: GO
Term	Database	ID	Input number	Background number	P-Value	Corrected P-Value	Input
cellular process	Gene Ontology	GO:0009987	37	14539	0.924502915714	0.939195055813	BMX; PLEKHG3; LNPEP; PTPRZ1; MBNL3; TNPO1; AHNAK; UGT8; USP34; LKAP; TCF20; RPS27; VLDLR; KCTD12; FAR2; DYNC1H1; HSPG2; KCNMB2; AGT; IRAK1BP1; PRKG1; FN1; ZCCHC11; RPL17; FLNC; SMARCA2; SNX13; HCFC1; PRTN3; ERBB4; SLC7A1i1; SMAD5; PCM12; DSG2; ZBED6; ZNF697; FREM2
cell part	Gene Ontology	GO:0044464	37	15333	0.96313643032	0.965768626875	BMX; LKAP; LNPEP; PTPRZ1; MBNL3; TNPO1; AHNAK; UGT8; USP34; TCF20; RPS27; VLDLR; KCTD12; FAR2; DYNC1H1; HSPG2; KCNMB2; AGT; IRAK1BP1; PRKG1; FN1; ZCCHC11; RPL17; FLNC; SMARCA2; SNX13; NCR3LG1; HCFC1; PRTN3; ERBB4; SLC7A1i1; SMAD5; PCM12; DSG2; ZBED6; ZNF697; FREM2
cell	Gene Ontology	GO:0005623	37	15372	0.964486050201	0.966375717227	BMX; LKAP; LNPEP; PTPRZ1; MBNL3; TNPO1; AHNAK; UGT8; USP34; TCF20; RPS27; VLDLR; KCTD12; FAR2; DYNC1H1; HSPG2; KCNMB2; AGT; IRAK1BP1; PRKG1; FN1; ZCCHC11; RPL17; FLNC; SMARCA2; SNX13; NCR3LG1; HCFC1; PRTN3; ERBB4; SLC7A1i1; SMAD5; PCM12; DSG2; ZBED6; ZNF697; FREM2
binding	Gene Ontology	GO:0005488	34	13563	0.929999922784	0.941413223499	BMX; LKAP; LNPEP; PTPRZ1; MBNL3; TNPO1; CRYBG3; AHNAK; USP34; TCF20; RPS27; KCTD12; VLDLR; DYNC1H1; HSPG2; AGT; IRAK1BP1; PRKG1; FN1; ZCCHC11; RPL17; FLNC; SMARCA2; SNX13; HCFC1; PRTN3; ERBB4; SLC7A1i1; SMAD5; PCM12; DSG2; ZBED6; ZNF697; FREM2
single-organism process	Gene Ontology	GO:0044699	33	13086	0.921971440949	0.937368180718	BMX; PLEKHG3; LNPEP; PTPRZ1; MBNL3; TNPO1; AHNAK; UGT8; USP34; LKAP; RPS27; VLDLR; FAR2; DYNC1H1; HSPG2; KCNMB2; AGT; IRAK1BP1; PRKG1; FN1; ZCCHC11; RPL17; FLNC; SMARCA2; HCFC1; PRTN3; ERBB4; SLC7A1i1; SMAD5; PCM12; DSG2; SNX13; FREM2
single-organism cellular process	Gene Ontology	GO:0044763	32	11895	0.843093100507	0.882061103827	BMX; PLEKHG3; LNPEP; PTPRZ1; MBNL3; AHNAK; UGT8; USP34; LKAP; RPS27; VLDLR; FAR2; DYNC1H1; HSPG2; KCNMB2; AGT; IRAK1BP1; PRKG1; FN1; ZCCHC11; RPL17; FLNC; SMARCA2; HCFC1; PRTN3; ERBB4; SLC7A1i1; SMAD5; PCM12; DSG2; SNX13; FREM2
organelle	Gene Ontology	GO:0043226	32	12280	0.884712244416	0.907685903526	LKAP; LNPEP; MBNL3; TNPO1; AHNAK; UGT8; USP34; TCF20; RPS27; VLDLR; KCTD12; FAR2; DYNC1H1; HSPG2; AGT; IRAK1BP1; PRKG1; FN1; ZCCHC11; RPL17; FLNC; SMARCA2; SNX13; HCFC1; PRTN3; ERBB4; SMAD5; PCM12; DSG2; ZBED6; ZNF697; FREM2
membrane-bounded organelle	Gene Ontology	GO:0043227	31	11410	0.825129975259	0.870034059485	LKAP; LNPEP; MBNL3; TNPO1; AHNAK; UGT8; USP34; TCF20; RPS27; VLDLR; KCTD12; FAR2; DYNC1H1; HSPG2; AGT; IRAK1BP1; PRKG1; FN1; ZCCHC11; RPL17; SMARCA2; SNX13; HCFC1; PRTN3; ERBB4; SMAD5; PCM12; DSG2; ZBED6; ZNF697; FREM2
regulation of biological process	Gene Ontology	GO:0050789	30	10370	0.713392293503	0.804271561127	BMX; PLEKHG3; LNPEP; PTPRZ1; MBNL3; TNPO1; AHNAK; USP34; LKAP; TCF20; RPS27; VLDLR; HSPG2; KCNMB2; AGT; IRAK1BP1; PRKG1; FN1; ZCCHC11; SMARCA2; SNX13; NCR3LG1; HCFC1; PRTN3; ERBB4; SMAD5; PCM12; DSG2; ZBED6; ZNF697
biological regulation	Gene Ontology	GO:0065007	30	10873	0.797582359532	0.853313009758	BMX; PLEKHG3; LNPEP; PTPRZ1; MBNL3; TNPO1; AHNAK; USP34; LKAP; TCF20; RPS27; VLDLR; HSPG2; KCNMB2; AGT; IRAK1BP1; PRKG1; FN1; ZCCHC11; SMARCA2; SNX13; NCR3LG1; HCFC1; PRTN3; ERBB4; SMAD5; PCM12; DSG2; ZBED6; ZNF697
metabolic process	Gene Ontology	GO:0008152	30	11353	0.860566488315	0.890631724034	BMX; PLEKHG3; LNPEP; PTPRZ1; MBNL3; TNPO1; AHNAK; UGT8; USP34; LKAP; TCF20; RPS27; VLDLR; FAR2; DYNC1H1; HSPG2; AGT; IRAK1BP1; PRKG1; FN1; ZCCHC11; RPL17; SMARCA2; SNX13; HCFC1; PRTN3; ERBB4; SMAD5; ZBED6; ZNF697
intracellular part	Gene Ontology	GO:0044424	30	13014	0.971145248783	0.972285983218	BMX; LKAP; LNPEP; MBNL3; TNPO1; AHNAK; UGT8; USP34; TCF20; RPS27; VLDLR; FAR2; DYNC1H1; HSPG2; AGT; IRAK1BP1; PRKG1; FN1; ZCCHC11; RPL17; FLNC; SMARCA2; SNX13; HCFC1; PRTN3; ERBB4; SMAD5; PCM12; ZBED6; ZNF697
intracellular	Gene Ontology	GO:0005622	30	13367	0.980411270641	0.980794843125	BMX; LKAP; LNPEP; MBNL3; TNPO1; AHNAK; UGT8; USP34; TCF20; RPS27; VLDLR; FAR2; DYNC1H1; HSPG2; AGT; IRAK1BP1; PRKG1; FN1; ZCCHC11; RPL17; FLNC; SMARCA2; SNX13; HCFC1; PRTN3; ERBB4; SMAD5; PCM12; ZBED6; ZNF697
membrane	Gene Ontology	GO:0016020	28	8609	0.468936518935	0.666150377176	BMX; LKAP; LNPEP; PTPRZ1; TNPO1; AHNAK; UGT8; ERBB4; VLDLR; KCTD12; FAR2; DYNC1H1; HSPG2; KCNMB2; LMBRD2; PRKG1; FN1; FLNC; NCR3LG1; HCFC1; PRTN3; SLC7A1i1; SMAD5; PCNXL3; PCM12; DSG2; SNX13; FREM2
regulation of cellular process	Gene Ontology	GO:0050794	27	9828	0.793877005378	0.851163745033	BMX; PLEKHG3; LNPEP; PTPRZ1; MBNL3; AHNAK; USP34; LKAP; TCF20; RPS27; VLDLR; HSPG2; AGT; IRAK1BP1; PRKG1; FN1; ZCCHC11; SMARCA2; SNX13; HCFC1; PRTN3; ERBB4; SMAD5; PCM12; DSG2; ZBED6; ZNF697
organic substance metabolic process	Gene Ontology	GO:0071704	27	10183	0.844850597637	0.882061103827	BMX; LKAP; LNPEP; PTPRZ1; MBNL3; TNPO1; AHNAK; UGT8; USP34; TCF20; RPS27; VLDLR; FAR2; HSPG2; AGT; IRAK1BP1; PRKG1; FN1; ZCCHC11; RPL17; SMARCA2; HCFC1; PRTN3; ERBB4; SMAD5; ZBED6; ZNF697
intracellular organelle	Gene Ontology	GO:0043229	27	11265	0.943162922528	0.952099326058	LKAP; RPS27; MBNL3; TNPO1; AHNAK; UGT8; USP34; TCF20; LNPEP; VLDLR; FAR2; DYNC1H1; HSPG2; IRAK1BP1; PRKG1; FN1; ZCCHC11; RPL17; FLNC; SMARCA2; SNX13; HCFC1; ERBB4; SMAD5; PCM12; ZBED6; ZNF697
primary metabolic process	Gene Ontology	GO:0044238	26	9862	0.848234851498	0.883548064838	BMX; LKAP; LNPEP; PTPRZ1; MBNL3; AHNAK; UGT8; USP34; TCF20; RPS27; VLDLR; FAR2; HSPG2; AGT; IRAK1BP1; PRKG1; FN1; ZCCHC11; RPL17; SMARCA2; HCFC1; PRTN3; ERBB4; SMAD5; ZBED6; ZNF697
protein binding	Gene Ontology	GO:0005515	26	10245	0.891958308979	0.913391027657	BMX; LNPEP; PTPRZ1; MBNL3; TNPO1; AHNAK; USP34; RPS27; VLDLR; DYNC1H1; HSPG2; AGT; IRAK1BP1; PRKG1; FN1; ZCCHC11; FLNC; SMARCA2; HCFC1; PRTN3; ERBB4; SLC7A1i1; SMAD5; PCM12; DSG2; ZBED6
macromolecule metabolic process	Gene Ontology	GO:0043170	25	8712	0.714628465733	0.804271561127	BMX; LKAP; LNPEP; PTPRZ1; MBNL3; TNPO1; AHNAK; USP34; TCF20; RPS27; VLDLR; HSPG2; AGT; IRAK1BP1; PRKG1; FN1; ZCCHC11; RPL17; SMARCA2; HCFC1; PRTN3; ERBB4; SMAD5; ZBED6; ZNF697
cellular metabolic process	Gene Ontology	GO:0044237	25	9800	0.882479316795	0.906224744195	BMX; LKAP; LNPEP; PTPRZ1; MBNL3; AHNAK; UGT8; USP34; TCF20; RPS27; VLDLR; FAR2; HSPG2; AGT; IRAK1BP1; PRKG1; FN1; ZCCHC11; RPL17; SMARCA2; HCFC1; ERBB4; SMAD5; ZBED6; ZNF697
cytoplasm	Gene Ontology	GO:0005737	25	10108	0.912275633545	0.928618150866	BMX; LKAP; LNPEP; MBNL3; TNPO1; AHNAK; USP34; ERBB4; VLDLR; FAR2; DYNC1H1; HSPG2; AGT; IRAK1BP1; PRKG1; FN1; ZCCHC11; RPL17; FLNC; HCFC1; PRTN3; SMAD5; PCM12; SNX13; RPS27
intracellular membrane-bounded organelle	Gene Ontology	GO:0043231	25	10299	0.927451881842	0.940695938862	LKAP; RPS27; MBNL3; TNPO1; AHNAK; UGT8; USP34; TCF20; LNPEP; VLDLR; FAR2; HSPG2; IRAK1BP1; PRKG1; FN1; ZCCHC11; RPL17; SMARCA2; SNX13; HCFC1; ERBB4; SMAD5; PCM12; ZBED6; ZNF697
cellular component organization	Gene Ontology	GO:0016043	24	5799	0.117833040185	0.422993856427	BMX; LKAP; LNPEP; PTPRZ1; TNPO1; AHNAK; UGT8; USP34; ERBB4; KCTD12; VLDLR; DYNC1H1; HSPG2; AGT; PRKG1; FN1; RPL17; FLNC; SMARCA2; HCFC1; PRTN3; PCM12; DSG2; RPS27
cellular component organization or biogenesis	Gene Ontology	GO:0071840	24	5925	0.138028841916	0.438537125545	BMX; LKAP; LNPEP; PTPRZ1; TNPO1; AHNAK; UGT8; USP34; ERBB4; KCTD12; VLDLR; DYNC1H1; HSPG2; AGT; PRKG1; FN1; RPL17; FLNC; SMARCA2; HCFC1; PRTN3; PCM12; DSG2; RPS27
cellular macromolecule metabolic process	Gene Ontology	GO:0044260	23	8088	0.723822553305	0.809276024836	BMX; LKAP; LNPEP; PTPRZ1; MBNL3; AHNAK; USP34; TCF20; RPS27; VLDLR; HSPG2; AGT; IRAK1BP1; PRKG1; FN1; ZCCHC11; RPL17; SMARCA2; HCFC1; ERBB4; SMAD5; ZBED6; ZNF697
cytoplasmic part	Gene Ontology	GO:0044444	21	7592	0.75993216413	0.82969536451	PRKG1; BMX; PCM12; FN1; LNPEP; FAR2; SMAD5; AHNAK; RPL17; FLNC; VLDLR; DYNC1H1; TNPO1; ERBB4; HSPG2; SNX13; RPS27; HCFC1; USP34; PRTN3; LKAP
response to stimulus	Gene Ontology	GO:0050896	21	8080	0.843243444194	0.882061103827	ERBB4; PRKG1; BMX; NCR3LG1; PLEKHG3; LNPEP; ZCCHC11; SMAD5; AGT; USP34; VLDLR; SNX13; DSG2; HSPG2; KCNMB2; FN1; RPS27; HCFC1; PRTN3; IRAK1BP1; LKAP
regulation of metabolic process	Gene Ontology	GO:0019222	20	6446	0.565888655797	0.725367995456	TCF20; PRKG1; PLEKHG3; FN1; ZCCHC11; SMAD5; MBNL3; AGT; TNPO1; VLDLR; SNX13; SMARCA2; ERBB4; AHNAK; ZBED6; ZNF697; HCFC1; USP34; IRAK1BP1; LKAP
nitrogen compound metabolic process	Gene Ontology	GO:0006807	20	6518	0.585489758629	0.739465968641	TCF20; RPS27; LNPEP; AGT; ZCCHC11; SMAD5; AHNAK; MBNL3; RPL17; VLDLR; SMARCA2; ERBB4; HSPG2; UGT8; ZBED6; ZNF697; HCFC1; USP34; IRAK1BP1; LKAP
multicellular organismal process	Gene Ontology	GO:0032501	20	6755	0.647337083328	0.764050830646	ERBB4; PRKG1; BMX; FN1; LNPEP; PCM12; ZCCHC11; SMAD5; MBNL3; PTPRZ1; VLDLR; SMARCA2; DSG2; HSPG2; KCNMB2; AGT; FREM2; PRTN3; UGT8; LKAP
organelle part	Gene Ontology	GO:0044422	20	7800	0.853548986518	0.884687782135	TCF20; FN1; LNPEP; PCM12; ZCCHC11; SMAD5; AHNAK; RPL17; FLNC; FAR2; DYNC1H1; SMARCA2; SNX13; HSPG2; ZBED6; RPS27; HCFC1; USP34; TNPO1; ERBB4
gene expression	Gene Ontology	GO:0010467	19	5110	0.272936348034	0.536368649212	TCF20; RPS27; FN1; AGT; ZCCHC11; SMAD5; MBNL3; RPL17; TNPO1; VLDLR; SMARCA2; ERBB4; AHNAK; ZBED6; ZNF697; HCFC1; USP34; IRAK1BP1; LKAP
single-organism developmental process	Gene Ontology	GO:0044767	19	5531	0.392427226808	0.616361436701	PRKG1; BMX; LKAP; FN1; PCM12; ZCCHC11; SMAD5; MBNL3; FLNC; VLDLR; SMARCA2; DSG2; HSPG2; UGT8; AGT; FREM2; PTPRZ1; PRTN3; ERBB4
developmental process	Gene Ontology	GO:0032502	19	5619	0.418407745129	0.630447026691	PRKG1; BMX; LKAP; FN1; PCM12; ZCCHC11; SMAD5; MBNL3; FLNC; VLDLR; SMARCA2; DSG2; HSPG2; UGT8; AGT; FREM2; PTPRZ1; PRTN3; ERBB4
ion binding	Gene Ontology	GO:0043167	19	5835	0.482309916134	0.674653422076	TCF20; PRKG1; BMX; FN1; LNPEP; ZCCHC11; SMAD5; MBNL3; VLDLR; DYNC1H1; SMARCA2; DSG2; SNX13; HSPG2; ZBED6; ZNF697; FREM2; RPS27; ERBB4
cellular nitrogen compound metabolic process	Gene Ontology	GO:0034641	19	6222	0.593099124746	0.743044812334	TCF20; RPS27; LNPEP; AGT; ZCCHC11; SMAD5; MBNL3; RPL17; VLDLR; SMARCA2; ERBB4; AHNAK; UGT8; ZBED6; ZNF697; HCFC1; USP34; IRAK1BP1; LKAP
single-multicellular organism process	Gene Ontology	GO:0044707	19	6512	0.669229994842	0.776820015619	PRKG1; BMX; FN1; LNPEP; PCM12; ZCCHC11; SMAD5; MBNL3; PTPRZ1; VLDLR; SMARCA2; DSG2; HSPG2; KCNMB2; AGT; FREM2; PRTN3; UGT8; ERBB4
intracellular organelle part	Gene Ontology	GO:0044446	19	7591	0.873316739916	0.898829510847	TCF20; FN1; LNPEP; PCM12; ZCCHC11; SMAD5; AHNAK; RPL17; FAR2; DYNC1H1; SMARCA2; SNX13; HSPG2; ZBED6; RPS27; HCFC1; USP34; TNPO1; ERBB4
anatomical structure development	Gene Ontology	GO:0048856	18	4959	0.313294170006	0.56143028454	PRKG1; BMX; LKAP; FN1; PCM12; SMAD5; MBNL3; FLNC; VLDLR; SMARCA2; DSG2; HSPG2; UGT8; AGT; FREM2; PTPRZ1; PRTN3; ERBB4
cell communication	Gene Ontology	GO:0007154	18	6070	0.640494323088	0.760326826433	PRKG1; BMX; PLEKHG3; LNPEP; ZCCHC11; SMAD5; AGT; VLDLR; SNX13; DSG2; HSPG2; KCNMB2; FN1; RPS27; FREM2; USP34; IRAK1BP1; ERBB4
membrane part	Gene Ontology	GO:0044425	18	6305	0.700325214512	0.79411599712	BMX; NCR3LG1; FN1; LNPEP; FAR2; KCTD12; SLC7A1i1; UGT8; PCNXL3; VLDLR; PTPRZ1; DSG2; AHNAK; KCNMB2; FREM2; SMAD5; LMBRD2; ERBB4
regulation of gene expression	Gene Ontology	GO:0010468	17	4101	0.163694511062	0.453393975326	TCF20; LKAP; FN1; ZCCHC11; SMAD5; MBNL3; AGT; TNPO1; VLDLR; SMARCA2; AHNAK; ZBED6; ZNF697; HCFC1; USP34; IRAK1BP1; ERBB4
plasma membrane	Gene Ontology	GO:0005886	17	4681	0.319067034614	0.564996127082	PRKG1; BMX; NCR3LG1; FN1; LNPEP; SLC7A1i1; KCTD12; AHNAK; FLNC; VLDLR; DSG2; HSPG2; KCNMB2; FREM2; PTPRZ1; PRTN3; ERBB4
cell periphery	Gene Ontology	GO:0071944	17	4778	0.34849393018	0.58509453675	PRKG1; BMX; NCR3LG1; FN1; LNPEP; SLC7A1i1; KCTD12; AHNAK; FLNC; VLDLR; DSG2; HSPG2; KCNMB2; FREM2; PTPRZ1; PRTN3; ERBB4
nucleic acid metabolic process	Gene Ontology	GO:0090304	17	4838	0.366971007173	0.597231253366	TCF20; LKAP; RPS27; AGT; ZCCHC11; SMAD5; MBNL3; RPL17; VLDLR; SMARCA2; AHNAK; ZBED6; ZNF697; HCFC1; USP34; IRAK1BP1; ERBB4
localization	Gene Ontology	GO:0051179	17	5376	0.534536519918	0.703091502794	PRKG1; RPS27; FN1; SLC7A1i1; AHNAK; RPL17; VLDLR; DYNC1H1; TNPO1; PRTN3; HSPG2; KCNMB2; SNX13; AGT; PCM12; UGT8; ERBB4
nucleobase-containing compound metabolic process	Gene Ontology	GO:0006139	17	5404	0.543035979445	0.708217582381	TCF20; LKAP; RPS27; AGT; ZCCHC11; SMAD5; MBNL3; RPL17; VLDLR; SMARCA2; AHNAK; ZBED6; ZNF697; HCFC1; USP34; IRAK1BP1; ERBB4
heterocycle metabolic process	Gene Ontology	GO:0046483	17	5578	0.59463760464	0.744601374217	TCF20; LKAP; RPS27; AGT; ZCCHC11; SMAD5; MBNL3; RPL17; VLDLR; SMARCA2; AHNAK; ZBED6; ZNF697; HCFC1; USP34; IRAK1BP1; ERBB4
regulation of macromolecule metabolic process	Gene Ontology	GO:0060255	17	5581	0.595506378676	0.744601374217	TCF20; LKAP; FN1; ZCCHC11; SMAD5; MBNL3; AGT; TNPO1; VLDLR; SMARCA2; AHNAK; ZBED6; ZNF697; HCFC1; USP34; IRAK1BP1; ERBB4
cellular aromatic compound metabolic process	Gene Ontology	GO:0006725	17	5591	0.598396645314	0.74613735358	TCF20; LKAP; RPS27; AGT; ZCCHC11; SMAD5; MBNL3; RPL17; VLDLR; SMARCA2; AHNAK; ZBED6; ZNF697; HCFC1; USP34; IRAK1BP1; ERBB4
heterocyclic compound binding	Gene Ontology	GO:1901363	17	5632	0.610153649941	0.747384976092	TCF20; PRKG1; BMX; LKAP; RPS27; ZCCHC11; KCTD12; MBNL3; RPL17; DYNC1H1; SMARCA2; AHNAK; ZBED6; ZNF697; SMAD5; TNPO1; ERBB4
organic cyclic compound binding	Gene Ontology	GO:0097159	17	5709	0.631807231066	0.756993256559	TCF20; PRKG1; BMX; LKAP; RPS27; ZCCHC11; KCTD12; MBNL3; RPL17; DYNC1H1; SMARCA2; AHNAK; ZBED6; ZNF697; SMAD5; TNPO1; ERBB4
organic cyclic compound metabolic process	Gene Ontology	GO:1901360	17	5799	0.656356477022	0.769595685276	TCF20; LKAP; RPS27; AGT; ZCCHC11; SMAD5; MBNL3; RPL17; VLDLR; SMARCA2; AHNAK; ZBED6; ZNF697; HCFC1; USP34; IRAK1BP1; ERBB4
organic substance biosynthetic process	Gene Ontology	GO:1901576	17	5898	0.682339380924	0.784443920792	TCF20; ERBB4; RPS27; FAR2; ZCCHC11; SMAD5; RPL17; VLDLR; SMARCA2; HSPG2; UGT8; ZBED6; ZNF697; HCFC1; USP34; IRAK1BP1; AGT
single organism signaling	Gene Ontology	GO:0044700	17	5969	0.700275493475	0.79411599712	PRKG1; BMX; PLEKHG3; LNPEP; ZCCHC11; SMAD5; AGT; VLDLR; SNX13; DSG2; HSPG2; KCNMB2; FN1; RPS27; USP34; IRAK1BP1; ERBB4
signaling	Gene Ontology	GO:0023052	17	5974	0.701515919982	0.794761279306	PRKG1; BMX; PLEKHG3; LNPEP; ZCCHC11; SMAD5; AGT; VLDLR; SNX13; DSG2; HSPG2; KCNMB2; FN1; RPS27; USP34; IRAK1BP1; ERBB4
biosynthetic process	Gene Ontology	GO:0009058	17	5982	0.703494314652	0.795623652353	TCF20; ERBB4; RPS27; FAR2; ZCCHC11; SMAD5; RPL17; VLDLR; SMARCA2; HSPG2; UGT8; ZBED6; ZNF697; HCFC1; USP34; IRAK1BP1; AGT
nucleus	Gene Ontology	GO:0005634	17	6547	0.822729897191	0.86894685961	TCF20; RPS27; TNPO1; PCM12; ZCCHC11; SMAD5; MBNL3; RPL17; VLDLR; SMARCA2; AHNAK; ZBED6; ZNF697; HCFC1; USP34; IRAK1BP1; ERBB4
cellular response to stimulus	Gene Ontology	GO:0051716	17	6774	0.859220957318	0.889845276574	PRKG1; BMX; PLEKHG3; LNPEP; ZCCHC11; SMAD5; AGT; VLDLR; ERBB4; HSPG2; FN1; SNX13; RPS27; HCFC1; USP34; IRAK1BP1; LKAP
cell differentiation	Gene Ontology	GO:0030154	16	3647	0.125004490608	0.426181976645	PRKG1; BMX; LKAP; FN1; PCM12; SMAD5; MBNL3; FLNC; VLDLR; SMARCA2; HSPG2; UGT8; AGT; PTPRZ1; PRTN3; ERBB4
cellular developmental process	Gene Ontology	GO:0048869	16	3887	0.178967187697	0.471286404677	PRKG1; BMX; LKAP; FN1; PCM12; SMAD5; MBNL3; FLNC; VLDLR; SMARCA2; HSPG2; UGT8; AGT; PTPRZ1; PRTN3; ERBB4
RNA metabolic process	Gene Ontology	GO:0016070	16	4353	0.309597018836	0.55957856469	TCF20; ERBB4; RPS27; ZCCHC11; SMAD5; MBNL3; RPL17; VLDLR; SMARCA2; AHNAK; ZBED6; ZNF697; HCFC1; USP34; IRAK1BP1; AGT
multicellular organismal development	Gene Ontology	GO:0007275	16	4745	0.434578862873	0.641580919381	PRKG1; BMX; ERBB4; FN1; PCM12; SMAD5; MBNL3; VLDLR; SMARCA2; DSG2; HSPG2; UGT8; AGT; FREM2; PTPRZ1; PRTN3
protein metabolic process	Gene Ontology	GO:0019538	16	5345	0.62174833797	0.753107768919	PRKG1; BMX; LNPEP; FN1; SMAD5; AGT; RPL17; VLDLR; PTPRZ1; ERBB4; HSPG2; RPS27; HCFC1; USP34; PRTN3; LKAP
regulation of primary metabolic process	Gene Ontology	GO:0080090	16	5567	0.68324029505	0.784537565977	TCF20; LKAP; FN1; ZCCHC11; SMAD5; MBNL3; AGT; VLDLR; SMARCA2; AHNAK; ZBED6; ZNF697; HCFC1; USP34; IRAK1BP1; ERBB4
regulation of cellular metabolic process	Gene Ontology	GO:0031323	16	5640	0.702164902728	0.795144223329	TCF20; LKAP; FN1; ZCCHC11; SMAD5; MBNL3; AGT; VLDLR; SMARCA2; AHNAK; ZBED6; ZNF697; HCFC1; USP34; IRAK1BP1; ERBB4
cellular biosynthetic process	Gene Ontology	GO:0044249	16	5800	0.741216225156	0.819053538342	TCF20; ERBB4; RPS27; FAR2; ZCCHC11; SMAD5; RPL17; VLDLR; SMARCA2; UGT8; ZBED6; ZNF697; HCFC1; USP34; IRAK1BP1; AGT
nucleic acid binding	Gene Ontology	GO:0003676	15	3805	0.232622142499	0.509218366819	TCF20; LKAP; RPS27; ZCCHC11; KCTD12; MBNL3; RPL17; DYNC1H1; SMARCA2; AHNAK; ZBED6; ZNF697; SMAD5; TNPO1; ERBB4
system development	Gene Ontology	GO:0048731	15	4193	0.35360264981	0.587881648611	PRKG1; BMX; ERBB4; FN1; PCM12; SMAD5; VLDLR; SMARCA2; DSG2; HSPG2; UGT8; AGT; FREM2; PTPRZ1; PRTN3
extracellular region	Gene Ontology	GO:0005576	15	4305	0.390746231933	0.614476085519	FN1; LNPEP; ZCCHC11; KCTD12; AHNAK; VLDLR; DYNC1H1; TNPO1; DSG2; HSPG2; AGT; FREM2; PTPRZ1; PRTN3; ERBB4
cellular nitrogen compound biosynthetic process	Gene Ontology	GO:0044271	15	4634	0.500663205812	0.684596693723	TCF20; ERBB4; RPS27; ZCCHC11; SMAD5; RPL17; VLDLR; SMARCA2; UGT8; ZBED6; ZNF697; HCFC1; USP34; IRAK1BP1; AGT
cellular protein metabolic process	Gene Ontology	GO:0044267	15	4800	0.554667614206	0.717592341236	PRKG1; BMX; LNPEP; FN1; SMAD5; RPL17; VLDLR; PTPRZ1; ERBB4; HSPG2; AGT; HCFC1; USP34; RPS27; LKAP
macromolecule biosynthetic process	Gene Ontology	GO:0009059	15	4916	0.591156383136	0.742542048294	TCF20; ERBB4; RPS27; ZCCHC11; SMAD5; RPL17; VLDLR; SMARCA2; HSPG2; ZBED6; ZNF697; HCFC1; USP34; IRAK1BP1; AGT
signal transduction	Gene Ontology	GO:0007165	15	5524	0.756768578968	0.828009095602	PRKG1; BMX; PLEKHG3; FN1; ZCCHC11; SMAD5; AGT; LNPEP; VLDLR; HSPG2; SNX13; RPS27; USP34; IRAK1BP1; ERBB4
cytosol	Gene Ontology	GO:0005829	14	3115	0.126091125902	0.427039824542	PRKG1; BMX; RPS27; LNPEP; SMAD5; RPL17; FLNC; PCM12; DYNC1H1; TNPO1; AHNAK; USP34; PRTN3; ERBB4
regulation of RNA metabolic process	Gene Ontology	GO:0051252	14	3539	0.238417630772	0.512608474961	TCF20; ERBB4; ZCCHC11; SMAD5; MBNL3; VLDLR; SMARCA2; AHNAK; ZBED6; ZNF697; HCFC1; USP34; IRAK1BP1; AGT
RNA biosynthetic process	Gene Ontology	GO:0032774	14	3681	0.282955069587	0.540079311091	TCF20; ERBB4; RPS27; ZCCHC11; SMAD5; RPL17; VLDLR; SMARCA2; ZBED6; ZNF697; HCFC1; USP34; IRAK1BP1; AGT
regulation of nucleobase-containing compound metabolic process	Gene Ontology	GO:0019219	14	3835	0.333908997919	0.575117774352	TCF20; ERBB4; ZCCHC11; SMAD5; MBNL3; VLDLR; SMARCA2; AHNAK; ZBED6; ZNF697; HCFC1; USP34; IRAK1BP1; AGT
negative regulation of cellular process	Gene Ontology	GO:0048523	14	4050	0.407805833944	0.625316357926	PRKG1; LKAP; FN1; PCM12; ZCCHC11; MBNL3; VLDLR; SMARCA2; SNX13; ZBED6; AGT; HCFC1; PRTN3; ERBB4
nucleobase-containing compound biosynthetic process	Gene Ontology	GO:0034654	14	4068	0.414062566701	0.629089710669	TCF20; ERBB4; RPS27; ZCCHC11; SMAD5; RPL17; VLDLR; SMARCA2; ZBED6; ZNF697; HCFC1; USP34; IRAK1BP1; AGT
regulation of nitrogen compound metabolic process	Gene Ontology	GO:0051171	14	4109	0.428323835643	0.63779558645	TCF20; ERBB4; ZCCHC11; SMAD5; MBNL3; VLDLR; SMARCA2; AHNAK; ZBED6; ZNF697; HCFC1; USP34; IRAK1BP1; AGT
heterocycle biosynthetic process	Gene Ontology	GO:0018130	14	4134	0.437020199181	0.644069538505	TCF20; ERBB4; RPS27; ZCCHC11; SMAD5; RPL17; VLDLR; SMARCA2; ZBED6; ZNF697; HCFC1; USP34; IRAK1BP1; AGT
aromatic compound biosynthetic process	Gene Ontology	GO:0019438	14	4139	0.438759040579	0.645851654961	TCF20; ERBB4; RPS27; ZCCHC11; SMAD5; RPL17; VLDLR; SMARCA2; ZBED6; ZNF697; HCFC1; USP34; IRAK1BP1; AGT
organic cyclic compound biosynthetic process	Gene Ontology	GO:1901362	14	4257	0.479660891311	0.67278820575	TCF20; ERBB4; RPS27; ZCCHC11; SMAD5; RPL17; VLDLR; SMARCA2; ZBED6; ZNF697; HCFC1; USP34; IRAK1BP1; AGT
transport	Gene Ontology	GO:0006810	14	4278	0.486895205732	0.678099695565	RPS27; FN1; SLC7A1i1; RPL17; VLDLR; DYNC1H1; TNPO1; AHNAK; KCNMB2; SNX13; AGT; PCM12; PRTN3; ERBB4
establishment of localization	Gene Ontology	GO:0051234	14	4399	0.52813592193	0.697903644639	RPS27; FN1; SLC7A1i1; RPL17; VLDLR; DYNC1H1; TNPO1; AHNAK; KCNMB2; SNX13; AGT; PCM12; PRTN3; ERBB4
negative regulation of biological process	Gene Ontology	GO:0048519	14	4409	0.531502994862	0.700866711276	PRKG1; LKAP; FN1; PCM12; ZCCHC11; MBNL3; VLDLR; SMARCA2; SNX13; ZBED6; AGT; HCFC1; PRTN3; ERBB4
cellular macromolecule biosynthetic process	Gene Ontology	GO:0034645	14	4762	0.644310088898	0.76270806988	TCF20; ERBB4; RPS27; ZCCHC11; SMAD5; RPL17; VLDLR; SMARCA2; ZBED6; ZNF697; HCFC1; USP34; IRAK1BP1; AGT
integral component of membrane	Gene Ontology	GO:0016021	14	5147	0.749060084971	0.823805005277	NCR3LG1; ERBB4; LNPEP; FAR2; SMAD5; SLC7A1i1; UGT8; PCNXL3; VLDLR; DSG2; KCNMB2; FREM2; PTPRZ1; LMBRD2
positive regulation of biological process	Gene Ontology	GO:0048518	14	5211	0.764301746174	0.831500812614	TCF20; PLEKHG3; FN1; PCM12; ZCCHC11; SMAD5; VLDLR; SMARCA2; SNX13; AGT; HCFC1; USP34; PRTN3; ERBB4
intrinsic component of membrane	Gene Ontology	GO:0031224	14	5265	0.776663577366	0.839684486796	NCR3LG1; ERBB4; LNPEP; FAR2; SMAD5; SLC7A1i1; UGT8; PCNXL3; VLDLR; DSG2; KCNMB2; FREM2; PTPRZ1; LMBRD2
extracellular region part	Gene Ontology	GO:0044421	13	3625	0.36483843515	0.595716397624	FN1; ZCCHC11; KCTD12; AHNAK; VLDLR; DYNC1H1; TNPO1; DSG2; HSPG2; AGT; FREM2; PTPRZ1; PRTN3
single-organism localization	Gene Ontology	GO:1902578	13	3894	0.461897925376	0.662407737064	RPS27; FN1; SLC7A1i1; RPL17; VLDLR; DYNC1H1; TNPO1; AHNAK; KCNMB2; AGT; PCM12; PRTN3; ERBB4
metal ion binding	Gene Ontology	GO:0046872	13	3913	0.468737287748	0.666150377176	TCF20; BMX; RPS27; LNPEP; ZCCHC11; SMAD5; MBNL3; VLDLR; DSG2; HSPG2; ZBED6; ZNF697; FREM2
cation binding	Gene Ontology	GO:0043169	13	3998	0.499149755977	0.683481501367	TCF20; BMX; RPS27; LNPEP; ZCCHC11; SMAD5; MBNL3; VLDLR; DSG2; HSPG2; ZBED6; ZNF697; FREM2
organelle lumen	Gene Ontology	GO:0043233	13	4043	0.515089608471	0.691105324013	TCF20; FN1; LNPEP; ZCCHC11; SMAD5; FAR2; SMARCA2; HSPG2; ZBED6; HCFC1; USP34; TNPO1; ERBB4
membrane-enclosed lumen	Gene Ontology	GO:0031974	13	4094	0.532982756962	0.701697628	TCF20; FN1; LNPEP; ZCCHC11; SMAD5; FAR2; SMARCA2; HSPG2; ZBED6; HCFC1; USP34; TNPO1; ERBB4
single-organism metabolic process	Gene Ontology	GO:0044710	13	5211	0.837924965059	0.879238810443	PRKG1; LKAP; FN1; FAR2; ZCCHC11; VLDLR; HSPG2; UGT8; AGT; HCFC1; USP34; PRTN3; ERBB4
catalytic activity	Gene Ontology	GO:0003824	13	5398	0.869573282033	0.896572129903	PRKG1; BMX; ERBB4; LNPEP; ZCCHC11; PTPRZ1; FAR2; DYNC1H1; SMARCA2; UGT8; HCFC1; USP34; PRTN3
cell development	Gene Ontology	GO:0048468	12	2083	0.0373832049416	0.376848857116	PRKG1; LKAP; FN1; PCM12; SMAD5; FLNC; VLDLR; SMARCA2; UGT8; AGT; PTPRZ1; ERBB4
multi-organism process	Gene Ontology	GO:0051704	12	2307	0.0686594744467	0.384104227651	RPS27; LNPEP; ZCCHC11; SMAD5; RPL17; VLDLR; SMARCA2; DSG2; TNPO1; AGT; HCFC1; LKAP
macromolecular complex subunit organization	Gene Ontology	GO:0043933	12	2453	0.0962068760481	0.407761641173	RPS27; FN1; KCTD12; RPL17; PCM12; DYNC1H1; SMARCA2; AHNAK; TNPO1; AGT; HCFC1; USP34
organ development	Gene Ontology	GO:0048513	12	2971	0.238562411108	0.512608474961	PRKG1; BMX; ERBB4; PCM12; SMAD5; VLDLR; DSG2; HSPG2; AGT; FREM2; PTPRZ1; PRTN3
membrane-bounded vesicle	Gene Ontology	GO:0031988	12	3393	0.390410461684	0.614325877246	FN1; LNPEP; ZCCHC11; KCTD12; AHNAK; DYNC1H1; TNPO1; DSG2; HSPG2; AGT; FREM2; PRTN3
regulation of transcription, DNA-templated	Gene Ontology	GO:0006355	12	3405	0.394931098616	0.616709325352	TCF20; ERBB4; ZCCHC11; SMAD5; VLDLR; SMARCA2; ZBED6; ZNF697; HCFC1; USP34; IRAK1BP1; AGT
regulation of nucleic acid-templated transcription	Gene Ontology	GO:1903506	12	3424	0.402095631015	0.621367987091	TCF20; ERBB4; ZCCHC11; SMAD5; VLDLR; SMARCA2; ZBED6; ZNF697; HCFC1; USP34; IRAK1BP1; AGT
regulation of RNA biosynthetic process	Gene Ontology	GO:2001141	12	3442	0.408888912965	0.625316357926	TCF20; ERBB4; ZCCHC11; SMAD5; VLDLR; SMARCA2; ZBED6; ZNF697; HCFC1; USP34; IRAK1BP1; AGT
vesicle	Gene Ontology	GO:0031982	12	3516	0.436832551184	0.644069538505	FN1; LNPEP; ZCCHC11; KCTD12; AHNAK; DYNC1H1; TNPO1; DSG2; HSPG2; AGT; FREM2; PRTN3
transcription, DNA-templated	Gene Ontology	GO:0006351	12	3549	0.449276915451	0.652727882278	TCF20; ERBB4; ZCCHC11; SMAD5; VLDLR; SMARCA2; ZBED6; ZNF697; HCFC1; USP34; IRAK1BP1; AGT
nucleic acid-templated transcription	Gene Ontology	GO:0097659	12	3564	0.454925089538	0.658571803831	TCF20; ERBB4; ZCCHC11; SMAD5; VLDLR; SMARCA2; ZBED6; ZNF697; HCFC1; USP34; IRAK1BP1; AGT
protein modification process	Gene Ontology	GO:0036211	12	3699	0.505327338653	0.686470329295	PRKG1; BMX; LNPEP; FN1; SMAD5; PTPRZ1; VLDLR; ERBB4; AGT; HCFC1; USP34; LKAP
cellular protein modification process	Gene Ontology	GO:0006464	12	3699	0.505327338653	0.686470329295	PRKG1; BMX; LNPEP; FN1; SMAD5; PTPRZ1; VLDLR; ERBB4; AGT; HCFC1; USP34; LKAP
single-organism transport	Gene Ontology	GO:0044765	12	3728	0.516010235659	0.691892067425	RPS27; FN1; SLC7A1i1; RPL17; VLDLR; TNPO1; AHNAK; KCNMB2; AGT; PCM12; PRTN3; ERBB4
regulation of cellular macromolecule biosynthetic process	Gene Ontology	GO:2000112	12	3746	0.522607962091	0.695887094764	TCF20; ERBB4; ZCCHC11; SMAD5; VLDLR; SMARCA2; ZBED6; ZNF697; HCFC1; USP34; IRAK1BP1; AGT
regulation of macromolecule biosynthetic process	Gene Ontology	GO:0010556	12	3854	0.561570373348	0.722448797285	TCF20; ERBB4; ZCCHC11; SMAD5; VLDLR; SMARCA2; ZBED6; ZNF697; HCFC1; USP34; IRAK1BP1; AGT
macromolecule modification	Gene Ontology	GO:0043412	12	3865	0.565471318698	0.725367995456	PRKG1; BMX; LNPEP; FN1; SMAD5; PTPRZ1; VLDLR; ERBB4; AGT; HCFC1; USP34; LKAP
intracellular organelle lumen	Gene Ontology	GO:0070013	12	3990	0.608769071516	0.746939786884	TCF20; ERBB4; LNPEP; ZCCHC11; SMAD5; FAR2; SMARCA2; HSPG2; ZBED6; HCFC1; USP34; TNPO1
regulation of cellular biosynthetic process	Gene Ontology	GO:0031326	12	4023	0.61985425329	0.751597387156	TCF20; ERBB4; ZCCHC11; SMAD5; VLDLR; SMARCA2; ZBED6; ZNF697; HCFC1; USP34; IRAK1BP1; AGT
regulation of biosynthetic process	Gene Ontology	GO:0009889	12	4067	0.634389698853	0.758588485852	TCF20; ERBB4; ZCCHC11; SMAD5; VLDLR; SMARCA2; ZBED6; ZNF697; HCFC1; USP34; IRAK1BP1; AGT
macromolecular complex	Gene Ontology	GO:0032991	12	4766	0.821215584343	0.867986047435	RPS27; FN1; PCM12; SMAD5; RPL17; VLDLR; DYNC1H1; SMARCA2; KCNMB2; HCFC1; USP34; ERBB4
protein localization	Gene Ontology	GO:0008104	11	2254	0.108927689563	0.416926245562	RPS27; FN1; PCM12; RPL17; VLDLR; TNPO1; HSPG2; UGT8; SNX13; AGT; ERBB4
cellular component assembly	Gene Ontology	GO:0022607	11	2264	0.111323620096	0.416926245562	RPS27; FN1; KCTD12; FLNC; PCM12; DYNC1H1; TNPO1; AHNAK; UGT8; AGT; HCFC1
regulation of multicellular organismal process	Gene Ontology	GO:0051239	11	2392	0.144603004466	0.441228976634	PRKG1; ERBB4; FN1; PCM12; ZCCHC11; SMAD5; VLDLR; DSG2; KCNMB2; AGT; PTPRZ1
cellular component biogenesis	Gene Ontology	GO:0044085	11	2453	0.162106566535	0.453225883138	RPS27; FN1; KCTD12; FLNC; PCM12; DYNC1H1; TNPO1; AHNAK; UGT8; AGT; HCFC1
macromolecule localization	Gene Ontology	GO:0033036	11	2591	0.205285463468	0.4989061282	RPS27; FN1; PCM12; RPL17; VLDLR; TNPO1; HSPG2; UGT8; SNX13; AGT; ERBB4
extracellular membrane-bounded organelle	Gene Ontology	GO:0065010	11	2660	0.22855112897	0.508178466761	FN1; ZCCHC11; KCTD12; HSPG2; DYNC1H1; TNPO1; DSG2; AHNAK; AGT; FREM2; PRTN3
extracellular exosome	Gene Ontology	GO:0070062	11	2660	0.22855112897	0.508178466761	FN1; ZCCHC11; KCTD12; HSPG2; DYNC1H1; TNPO1; DSG2; AHNAK; AGT; FREM2; PRTN3
extracellular organelle	Gene Ontology	GO:0043230	11	2673	0.233046623219	0.509218366819	FN1; ZCCHC11; KCTD12; HSPG2; DYNC1H1; TNPO1; DSG2; AHNAK; AGT; FREM2; PRTN3
extracellular vesicle	Gene Ontology	GO:1903561	11	2673	0.233046623219	0.509218366819	FN1; ZCCHC11; KCTD12; HSPG2; DYNC1H1; TNPO1; DSG2; AHNAK; AGT; FREM2; PRTN3
regulation of biological quality	Gene Ontology	GO:0065008	11	3417	0.518574668434	0.69387515813	PRKG1; LNPEP; FN1; SMAD5; TNPO1; DSG2; KCNMB2; AGT; HCFC1; PRTN3; ERBB4
organelle organization	Gene Ontology	GO:0006996	11	3473	0.539892450731	0.706502045301	PRKG1; LKAP; RPS27; PCM12; DYNC1H1; TNPO1; UGT8; SMARCA2; HCFC1; USP34; ERBB4
RNA binding	Gene Ontology	GO:0003723	10	1527	0.0264738905041	0.376848857116	TCF20; LKAP; RPS27; ZCCHC11; KCTD12; MBNL3; RPL17; DYNC1H1; TNPO1; AHNAK
whole membrane	Gene Ontology	GO:0098805	10	1880	0.0811076573511	0.388274166398	BMX; FN1; LNPEP; FAR2; KCTD12; VLDLR; DSG2; AHNAK; SNX13; ERBB4
nervous system development	Gene Ontology	GO:0007399	10	2260	0.186120268858	0.477820810714	PRKG1; ERBB4; FN1; PCM12; PTPRZ1; VLDLR; SMARCA2; HSPG2; UGT8; AGT
plasma membrane part	Gene Ontology	GO:0044459	10	2390	0.231820041055	0.509218366819	BMX; LNPEP; FN1; SLC7A1i1; KCTD12; DSG2; AHNAK; KCNMB2; PTPRZ1; ERBB4
organic substance transport	Gene Ontology	GO:0071702	10	2449	0.25383846806	0.524384132894	FN1; RPS27; SLC7A1i1; RPL17; VLDLR; TNPO1; SNX13; AGT; PCM12; ERBB4
immune system process	Gene Ontology	GO:0002376	10	2523	0.282388243643	0.540079311091	BMX; LNPEP; FN1; SMAD5; DYNC1H1; IRAK1BP1; NCR3LG1; PTPRZ1; PRTN3; ERBB4
anatomical structure morphogenesis	Gene Ontology	GO:0009653	10	2654	0.334904327732	0.575117774352	ERBB4; FN1; PCM12; SMAD5; VLDLR; HSPG2; UGT8; AGT; FREM2; PTPRZ1
regulation of molecular function	Gene Ontology	GO:0065009	10	2694	0.351304239078	0.586658738865	PRKG1; PLEKHG3; FN1; ZCCHC11; VLDLR; ERBB4; AHNAK; SNX13; AGT; LKAP
cellular localization	Gene Ontology	GO:0051641	10	2808	0.398564955983	0.618687939792	FN1; RPS27; RPL17; PCM12; DYNC1H1; TNPO1; UGT8; SNX13; AGT; ERBB4
phosphorus metabolic process	Gene Ontology	GO:0006793	10	2982	0.470878138008	0.667625128955	PRKG1; BMX; LKAP; FN1; FAR2; SMAD5; VLDLR; AGT; PTPRZ1; ERBB4
positive regulation of metabolic process	Gene Ontology	GO:0009893	10	3412	0.637896921643	0.759712356144	TCF20; PLEKHG3; FN1; SMAD5; VLDLR; SMARCA2; SNX13; AGT; HCFC1; ERBB4
nuclear part	Gene Ontology	GO:0044428	10	3678	0.725336012053	0.810504192004	TCF20; ERBB4; ZCCHC11; SMAD5; PCM12; SMARCA2; ZBED6; HCFC1; USP34; TNPO1
protein complex	Gene Ontology	GO:0043234	10	4124	0.837976136507	0.879238810443	ERBB4; FN1; PCM12; SMAD5; VLDLR; DYNC1H1; SMARCA2; KCNMB2; HCFC1; USP34
positive regulation of cellular process	Gene Ontology	GO:0048522	10	4490	0.900462414197	0.920256751839	TCF20; ERBB4; FN1; SMAD5; VLDLR; SMARCA2; AGT; HCFC1; USP34; PRTN3
poly(A) RNA binding	Gene Ontology	GO:0044822	9	1139	0.011959423354	0.376848857116	TCF20; RPS27; ZCCHC11; KCTD12; MBNL3; RPL17; DYNC1H1; TNPO1; AHNAK
protein transport	Gene Ontology	GO:0015031	9	1718	0.101061657536	0.41098482478	FN1; RPS27; PCM12; RPL17; VLDLR; TNPO1; SNX13; AGT; ERBB4
protein complex subunit organization	Gene Ontology	GO:0071822	9	1729	0.103963338677	0.413290409216	RPS27; FN1; KCTD12; RPL17; PCM12; DYNC1H1; TNPO1; AHNAK; HCFC1
establishment of protein localization	Gene Ontology	GO:0045184	9	1844	0.137054184308	0.438537125545	FN1; RPS27; PCM12; RPL17; VLDLR; TNPO1; SNX13; AGT; ERBB4
cell proliferation	Gene Ontology	GO:0008283	9	1869	0.1448929911	0.441322037783	BMX; FN1; RPS27; PTPRZ1; PCM12; SMARCA2; AGT; PRTN3; ERBB4
establishment of localization in cell	Gene Ontology	GO:0051649	9	2448	0.373141880346	0.59977012656	FN1; RPS27; RPL17; PCM12; DYNC1H1; TNPO1; SNX13; AGT; ERBB4
intracellular signal transduction	Gene Ontology	GO:0035556	9	2617	0.44764797898	0.651963035922	PRKG1; BMX; PLEKHG3; RPS27; SMAD5; FN1; AGT; IRAK1BP1; ERBB4
phosphate-containing compound metabolic process	Gene Ontology	GO:0006796	9	2924	0.578032317202	0.73325606361	PRKG1; BMX; LKAP; FN1; SMAD5; VLDLR; AGT; PTPRZ1; ERBB4
nuclear lumen	Gene Ontology	GO:0031981	9	3323	0.722813274795	0.809209082159	TCF20; ERBB4; ZCCHC11; SMAD5; SMARCA2; ZBED6; HCFC1; USP34; TNPO1
regulation of response to stimulus	Gene Ontology	GO:0048583	9	3514	0.779058611388	0.84017413299	PRKG1; PLEKHG3; FN1; ZCCHC11; NCR3LG1; SNX13; AGT; USP34; ERBB4
endomembrane system	Gene Ontology	GO:0012505	9	3531	0.783636436411	0.843332646423	PRKG1; LNPEP; FN1; FAR2; VLDLR; TNPO1; HSPG2; SNX13; PCM12
intracellular non-membrane-bounded organelle	Gene Ontology	GO:0043232	9	3590	0.798986705808	0.85374383901	RPS27; ZCCHC11; RPL17; FLNC; PCM12; DYNC1H1; SMARCA2; AHNAK; ZBED6
non-membrane-bounded organelle	Gene Ontology	GO:0043228	9	3590	0.798986705808	0.85374383901	RPS27; ZCCHC11; RPL17; FLNC; PCM12; DYNC1H1; SMARCA2; AHNAK; ZBED6
response to stress	Gene Ontology	GO:0006950	9	3832	0.853496571547	0.884687782135	PRKG1; BMX; LKAP; FN1; VLDLR; KCNMB2; AGT; PRTN3; ERBB4
central nervous system development	Gene Ontology	GO:0007417	8	866	0.00735772191448	0.376848857116	PRKG1; ERBB4; PCM12; PTPRZ1; VLDLR; HSPG2; UGT8; AGT
cellular protein localization	Gene Ontology	GO:0034613	8	1401	0.0818795076456	0.388274166398	ERBB4; RPS27; RPL17; PCM12; TNPO1; UGT8; SNX13; AGT
cellular macromolecule localization	Gene Ontology	GO:0070727	8	1409	0.0839099976859	0.390962413701	ERBB4; RPS27; RPL17; PCM12; TNPO1; UGT8; SNX13; AGT
regulation of cell differentiation	Gene Ontology	GO:0045595	8	1414	0.0851939534975	0.391800250168	ERBB4; FN1; PCM12; SMAD5; MBNL3; VLDLR; AGT; PTPRZ1
neurogenesis	Gene Ontology	GO:0022008	8	1610	0.144317165386	0.440882905487	PRKG1; ERBB4; FN1; PCM12; PTPRZ1; VLDLR; UGT8; AGT
tissue development	Gene Ontology	GO:0009888	8	1700	0.176818549772	0.467990136267	BMX; ERBB4; FN1; SMAD5; DSG2; HSPG2; AGT; FREM2
system process	Gene Ontology	GO:0003008	8	1855	0.239322965789	0.513810934948	PRKG1; LNPEP; SMAD5; VLDLR; DSG2; KCNMB2; AGT; PTPRZ1
regulation of developmental process	Gene Ontology	GO:0050793	8	2031	0.317617018804	0.563612968342	ERBB4; FN1; PCM12; SMAD5; MBNL3; VLDLR; AGT; PTPRZ1
catabolic process	Gene Ontology	GO:0009056	8	2118	0.358038225063	0.592559055978	PRKG1; RPS27; LNPEP; ZCCHC11; RPL17; HSPG2; USP34; PRTN3
regulation of catalytic activity	Gene Ontology	GO:0050790	8	2242	0.416382706439	0.630130823564	PRKG1; ERBB4; FN1; LKAP; VLDLR; SNX13; AGT; PLEKHG3
cell surface receptor signaling pathway	Gene Ontology	GO:0007166	8	2663	0.605690313721	0.746939786884	BMX; ERBB4; LNPEP; ZCCHC11; SMAD5; VLDLR; AGT; USP34
positive regulation of macromolecule metabolic process	Gene Ontology	GO:0010604	8	2737	0.635713949424	0.758588485852	TCF20; ERBB4; FN1; SMAD5; VLDLR; SMARCA2; AGT; HCFC1
positive regulation of cellular metabolic process	Gene Ontology	GO:0031325	8	2789	0.656027204439	0.769595685276	TCF20; ERBB4; FN1; SMAD5; VLDLR; SMARCA2; AGT; HCFC1
response to chemical	Gene Ontology	GO:0042221	8	4132	0.948240469098	0.954923143789	ERBB4; ZCCHC11; SMAD5; VLDLR; DSG2; KCNMB2; AGT; HCFC1
cellular component disassembly	Gene Ontology	GO:0022411	7	726	0.00950404503407	0.376848857116	PRKG1; BMX; FN1; RPS27; RPL17; DSG2; HSPG2
cardiovascular system development	Gene Ontology	GO:0072358	7	873	0.0232693384937	0.376848857116	ERBB4; FN1; VLDLR; SMARCA2; DSG2; HSPG2; AGT
circulatory system development	Gene Ontology	GO:0072359	7	873	0.0232693384937	0.376848857116	ERBB4; FN1; VLDLR; SMARCA2; DSG2; HSPG2; AGT
intracellular protein transport	Gene Ontology	GO:0006886	7	929	0.0309794492587	0.376848857116	ERBB4; RPS27; RPL17; PCM12; TNPO1; SNX13; AGT
membrane region	Gene Ontology	GO:0098589	7	1077	0.0590320705575	0.384104227651	BMX; ERBB4; FN1; KCTD12; VLDLR; DSG2; AHNAK
cell projection organization	Gene Ontology	GO:0030030	7	1416	0.167430854013	0.456655601016	PRKG1; ERBB4; FN1; PCM12; PTPRZ1; VLDLR; UGT8
regulation of cell proliferation	Gene Ontology	GO:0042127	7	1452	0.182228985902	0.473545447075	BMX; ERBB4; FN1; PTPRZ1; SMARCA2; AGT; PRTN3
macromolecular complex assembly	Gene Ontology	GO:0065003	7	1494	0.200149332387	0.49380113323	RPS27; FN1; KCTD12; DYNC1H1; TNPO1; AHNAK; HCFC1
generation of neurons	Gene Ontology	GO:0048699	7	1532	0.216923032907	0.503332300493	PRKG1; ERBB4; FN1; PCM12; PTPRZ1; VLDLR; UGT8
positive regulation of gene expression	Gene Ontology	GO:0010628	7	1646	0.269939929772	0.533080903619	TCF20; ERBB4; FN1; SMAD5; SMARCA2; AGT; HCFC1
intracellular transport	Gene Ontology	GO:0046907	7	1700	0.29617550308	0.550778735547	ERBB4; RPS27; RPL17; PCM12; TNPO1; SNX13; AGT
protein phosphorylation	Gene Ontology	GO:0006468	7	1756	0.323926813959	0.568948141527	PRKG1; BMX; ERBB4; FN1; SMAD5; VLDLR; AGT
phosphorylation	Gene Ontology	GO:0016310	7	2083	0.488757510519	0.679213562173	PRKG1; BMX; ERBB4; FN1; SMAD5; VLDLR; AGT
carbohydrate derivative binding	Gene Ontology	GO:0097367	7	2153	0.522959916503	0.695887094764	PRKG1; BMX; ERBB4; FN1; VLDLR; DYNC1H1; SMARCA2
regulation of localization	Gene Ontology	GO:0032879	7	2235	0.561874678097	0.722448797285	ERBB4; FN1; PCM12; DSG2; AHNAK; AGT; PRTN3
negative regulation of cellular metabolic process	Gene Ontology	GO:0031324	7	2316	0.598840045634	0.74613735358	LKAP; ZCCHC11; VLDLR; SMARCA2; ZBED6; AGT; HCFC1
negative regulation of macromolecule metabolic process	Gene Ontology	GO:0010605	7	2333	0.606391096292	0.746939786884	LKAP; ZCCHC11; VLDLR; SMARCA2; ZBED6; AGT; HCFC1
DNA binding	Gene Ontology	GO:0003677	7	2373	0.623856316819	0.753519415261	TCF20; ERBB4; RPS27; SMAD5; SMARCA2; ZBED6; ZNF697
regulation of signal transduction	Gene Ontology	GO:0009966	7	2525	0.686086015653	0.786338835511	ERBB4; FN1; ZCCHC11; SNX13; AGT; USP34; PLEKHG3
anion binding	Gene Ontology	GO:0043168	7	2556	0.697930398275	0.79411599712	PRKG1; BMX; ERBB4; FN1; DYNC1H1; SMARCA2; SNX13
negative regulation of metabolic process	Gene Ontology	GO:0009892	7	2598	0.713504201276	0.804271561127	LKAP; ZCCHC11; VLDLR; SMARCA2; ZBED6; AGT; HCFC1
response to organic substance	Gene Ontology	GO:0010033	7	2817	0.785781455001	0.844685700179	ERBB4; ZCCHC11; SMAD5; VLDLR; DSG2; AGT; HCFC1
regulation of signaling	Gene Ontology	GO:0023051	7	2849	0.795096893986	0.851722981953	ERBB4; FN1; ZCCHC11; SNX13; AGT; USP34; PLEKHG3
regulation of cell communication	Gene Ontology	GO:0010646	7	2894	0.807672474729	0.860074800822	ERBB4; FN1; ZCCHC11; SNX13; AGT; USP34; PLEKHG3
blood circulation	Gene Ontology	GO:0008015	6	432	0.0029462152421	0.376848857116	PRKG1; LNPEP; SMAD5; DSG2; KCNMB2; AGT
circulatory system process	Gene Ontology	GO:0003013	6	434	0.00301243142124	0.376848857116	PRKG1; LNPEP; SMAD5; DSG2; KCNMB2; AGT
protein localization to organelle	Gene Ontology	GO:0033365	6	811	0.0471590940705	0.376848857116	ERBB4; RPS27; RPL17; PCM12; TNPO1; AGT
multi-organism reproductive process	Gene Ontology	GO:0044703	6	896	0.068910521395	0.384104227651	LKAP; LNPEP; SMAD5; SMARCA2; DSG2; AGT
response to wounding	Gene Ontology	GO:0009611	6	1014	0.107227178198	0.414837285484	PRKG1; ERBB4; FN1; KCNMB2; AGT; PRTN3
neuron projection development	Gene Ontology	GO:0031175	6	1039	0.116513506701	0.422993856427	PRKG1; ERBB4; FN1; PTPRZ1; VLDLR; UGT8
cell projection morphogenesis	Gene Ontology	GO:0048858	6	1050	0.120723038094	0.424088445107	ERBB4; FN1; PCM12; PTPRZ1; VLDLR; UGT8
cell part morphogenesis	Gene Ontology	GO:0032990	6	1070	0.128565856149	0.428968799824	ERBB4; FN1; PCM12; PTPRZ1; VLDLR; UGT8
macromolecule catabolic process	Gene Ontology	GO:0009057	6	1118	0.148348544154	0.443367581152	LNPEP; RPS27; ZCCHC11; RPL17; HSPG2; USP34
neuron development	Gene Ontology	GO:0048666	6	1177	0.17439663252	0.46518101991	PRKG1; ERBB4; FN1; PTPRZ1; VLDLR; UGT8
single-organism cellular localization	Gene Ontology	GO:1902580	6	1194	0.182229025601	0.473545447075	ERBB4; RPS27; RPL17; DYNC1H1; TNPO1; AGT
regulation of hydrolase activity	Gene Ontology	GO:0051336	6	1218	0.193517395449	0.486572586047	PRKG1; PLEKHG3; FN1; SNX13; AGT; LKAP
reproductive process	Gene Ontology	GO:0022414	6	1283	0.22532690712	0.508178466761	LKAP; LNPEP; SMAD5; SMARCA2; DSG2; AGT
lipid metabolic process	Gene Ontology	GO:0006629	6	1283	0.22532690712	0.508178466761	ERBB4; FAR2; VLDLR; HSPG2; UGT8; AGT
reproduction	Gene Ontology	GO:0000003	6	1285	0.226331842571	0.508178466761	LKAP; LNPEP; SMAD5; SMARCA2; DSG2; AGT
extracellular space	Gene Ontology	GO:0005615	6	1289	0.228346050516	0.508178466761	FN1; ZCCHC11; VLDLR; HSPG2; AGT; PRTN3
positive regulation of multicellular organismal process	Gene Ontology	GO:0051240	6	1338	0.253459340179	0.5243491366	ERBB4; FN1; ZCCHC11; SMAD5; VLDLR; AGT
cell adhesion	Gene Ontology	GO:0007155	6	1389	0.28034763924	0.540079311091	PRKG1; BMX; FN1; DSG2; AGT; FREM2
positive regulation of transcription, DNA-templated	Gene Ontology	GO:0045893	6	1390	0.280881387692	0.540079311091	TCF20; ERBB4; SMAD5; SMARCA2; AGT; HCFC1
positive regulation of nucleic acid-templated transcription	Gene Ontology	GO:1903508	6	1390	0.280881387692	0.540079311091	TCF20; ERBB4; SMAD5; SMARCA2; AGT; HCFC1
biological adhesion	Gene Ontology	GO:0022610	6	1395	0.283553530755	0.540079311091	PRKG1; BMX; FN1; DSG2; AGT; FREM2
cell morphogenesis	Gene Ontology	GO:0000902	6	1398	0.285159491267	0.540113199385	ERBB4; FN1; PCM12; PTPRZ1; VLDLR; UGT8
positive regulation of RNA biosynthetic process	Gene Ontology	GO:1902680	6	1416	0.294835292214	0.549886099338	TCF20; ERBB4; SMAD5; SMARCA2; AGT; HCFC1
neuron differentiation	Gene Ontology	GO:0030182	6	1422	0.298074987488	0.552057021189	PRKG1; ERBB4; FN1; PTPRZ1; VLDLR; UGT8
positive regulation of RNA metabolic process	Gene Ontology	GO:0051254	6	1452	0.314369376312	0.56143028454	TCF20; ERBB4; SMAD5; SMARCA2; AGT; HCFC1
positive regulation of catalytic activity	Gene Ontology	GO:0043085	6	1474	0.326406318678	0.569725125124	PLEKHG3; FN1; VLDLR; SNX13; AGT; ERBB4
cellular component morphogenesis	Gene Ontology	GO:0032989	6	1477	0.328052615862	0.57148537419	ERBB4; FN1; PCM12; PTPRZ1; VLDLR; UGT8
regulation of multicellular organismal development	Gene Ontology	GO:2000026	6	1517	0.350092712808	0.586239074426	ERBB4; FN1; PCM12; PTPRZ1; VLDLR; AGT
single-organism intracellular transport	Gene Ontology	GO:1902582	6	1536	0.360606122361	0.593940822326	ERBB4; RPS27; RPL17; PCM12; TNPO1; AGT
positive regulation of macromolecule biosynthetic process	Gene Ontology	GO:0010557	6	1596	0.393883991026	0.616709325352	TCF20; ERBB4; SMAD5; SMARCA2; AGT; HCFC1
positive regulation of nucleobase-containing compound metabolic process	Gene Ontology	GO:0045935	6	1639	0.417705023833	0.630130823564	TCF20; ERBB4; SMAD5; SMARCA2; AGT; HCFC1
regulation of transport	Gene Ontology	GO:0051049	6	1656	0.427094388938	0.63779558645	ERBB4; FN1; PCM12; AHNAK; AGT; PRTN3
positive regulation of cellular biosynthetic process	Gene Ontology	GO:0031328	6	1707	0.455102220325	0.658571803831	TCF20; ERBB4; SMAD5; SMARCA2; AGT; HCFC1
positive regulation of nitrogen compound metabolic process	Gene Ontology	GO:0051173	6	1720	0.462192362132	0.662458447293	TCF20; ERBB4; SMAD5; SMARCA2; AGT; HCFC1
positive regulation of molecular function	Gene Ontology	GO:0044093	6	1728	0.466543773692	0.665326678738	PLEKHG3; FN1; VLDLR; SNX13; AGT; ERBB4
positive regulation of biosynthetic process	Gene Ontology	GO:0009891	6	1741	0.473594368001	0.668680728315	TCF20; ERBB4; SMAD5; SMARCA2; AGT; HCFC1
organic substance catabolic process	Gene Ontology	GO:1901575	6	1752	0.47953927835	0.67278820575	LNPEP; RPS27; ZCCHC11; RPL17; HSPG2; USP34
movement of cell or subcellular component	Gene Ontology	GO:0006928	6	1837	0.524710123288	0.695887094764	PRKG1; ERBB4; FN1; PCM12; DYNC1H1; AGT
regulation of cellular component organization	Gene Ontology	GO:0051128	6	2034	0.622381245188	0.753358565261	FN1; VLDLR; SMARCA2; AGT; HCFC1; PRTN3
organonitrogen compound metabolic process	Gene Ontology	GO:1901564	6	2133	0.666851180777	0.775441006228	LNPEP; RPS27; RPL17; HSPG2; UGT8; AGT
transferase activity	Gene Ontology	GO:0016740	6	2142	0.670724680822	0.777237349133	PRKG1; BMX; ERBB4; ZCCHC11; UGT8; HCFC1
cellular response to organic substance	Gene Ontology	GO:0071310	6	2206	0.69743084092	0.79411599712	ERBB4; ZCCHC11; SMAD5; VLDLR; AGT; HCFC1
nucleotide binding	Gene Ontology	GO:0000166	6	2255	0.716870646305	0.805023382786	PRKG1; BMX; LKAP; DYNC1H1; SMARCA2; ERBB4
nucleoside phosphate binding	Gene Ontology	GO:1901265	6	2256	0.717258208052	0.805105021066	PRKG1; BMX; LKAP; DYNC1H1; SMARCA2; ERBB4
hydrolase activity	Gene Ontology	GO:0016787	6	2302	0.734688441907	0.814621492497	LNPEP; PTPRZ1; DYNC1H1; SMARCA2; USP34; PRTN3
regulation of cellular protein metabolic process	Gene Ontology	GO:0032268	6	2334	0.746354814563	0.822244403635	ERBB4; FN1; ZCCHC11; VLDLR; AGT; LKAP
response to external stimulus	Gene Ontology	GO:0009605	6	2386	0.764512479646	0.831500812614	PRKG1; ERBB4; ZCCHC11; VLDLR; HSPG2; AGT
single-organism organelle organization	Gene Ontology	GO:1902589	6	2478	0.794241961537	0.851163745033	PRKG1; LKAP; PCM12; DYNC1H1; HCFC1; USP34
regulation of protein metabolic process	Gene Ontology	GO:0051246	6	2498	0.800307056034	0.854440560451	ERBB4; FN1; ZCCHC11; VLDLR; AGT; LKAP
small molecule binding	Gene Ontology	GO:0036094	6	2546	0.814296876792	0.863249218059	PRKG1; BMX; LKAP; DYNC1H1; SMARCA2; ERBB4
cellular response to chemical stimulus	Gene Ontology	GO:0070887	6	2679	0.849036970491	0.883548064838	ERBB4; ZCCHC11; SMAD5; VLDLR; AGT; HCFC1
nucleoplasm	Gene Ontology	GO:0005654	6	2708	0.85586193794	0.886725678814	TCF20; ERBB4; SMAD5; SMARCA2; HCFC1; USP34
organelle membrane	Gene Ontology	GO:0031090	6	2925	0.899228894077	0.919731312862	LNPEP; PCM12; FAR2; TNPO1; AHNAK; SNX13
cell junction organization	Gene Ontology	GO:0034330	5	248	0.00135987239031	0.376848857116	UGT8; AGT; FLNC; DSG2; FN1
extracellular matrix	Gene Ontology	GO:0031012	5	415	0.0113597004363	0.376848857116	PTPRZ1; FREM2; PRTN3; FN1; HSPG2
heart development	Gene Ontology	GO:0007507	5	454	0.0160741041063	0.376848857116	VLDLR; ERBB4; AGT; DSG2; HSPG2
muscle structure development	Gene Ontology	GO:0061061	5	561	0.0351548703432	0.376848857116	MBNL3; AGT; SMARCA2; ERBB4; FLNC
regulation of neurogenesis	Gene Ontology	GO:0050767	5	602	0.0450706692021	0.376848857116	VLDLR; PTPRZ1; ERBB4; FN1; PCM12
establishment of protein localization to organelle	Gene Ontology	GO:0072594	5	615	0.0485287365213	0.376848857116	AGT; TNPO1; RPL17; RPS27; ERBB4
brain development	Gene Ontology	GO:0007420	5	642	0.0561973545728	0.384104227651	VLDLR; PRKG1; PCM12; ERBB4; HSPG2
protein targeting	Gene Ontology	GO:0006605	5	663	0.062615840168	0.384104227651	AGT; TNPO1; RPL17; RPS27; ERBB4
head development	Gene Ontology	GO:0060322	5	681	0.0684322020096	0.384104227651	VLDLR; PRKG1; PCM12; ERBB4; HSPG2
regulation of nervous system development	Gene Ontology	GO:0051960	5	688	0.0707721478638	0.384104227651	VLDLR; PTPRZ1; ERBB4; FN1; PCM12
regulation of body fluid levels	Gene Ontology	GO:0050878	5	695	0.0731555568503	0.384104227651	KCNMB2; PRKG1; PRTN3; FN1; ERBB4
wound healing	Gene Ontology	GO:0042060	5	710	0.0784083588514	0.388274166398	KCNMB2; PRKG1; PRTN3; FN1; ERBB4
multicellular organismal reproductive process	Gene Ontology	GO:0048609	5	735	0.0875988995343	0.392703442468	AGT; SMAD5; SMARCA2; DSG2; LKAP
multicellular organism reproduction	Gene Ontology	GO:0032504	5	759	0.0969247123349	0.408522849443	AGT; SMAD5; SMARCA2; DSG2; LKAP
regulation of cell development	Gene Ontology	GO:0060284	5	770	0.101360203574	0.41098482478	VLDLR; PTPRZ1; ERBB4; FN1; PCM12
neuron projection morphogenesis	Gene Ontology	GO:0048812	5	829	0.126808745092	0.427039824542	UGT8; VLDLR; PTPRZ1; ERBB4; FN1
plasma membrane region	Gene Ontology	GO:0098590	5	891	0.156348123088	0.449838739055	KCTD12; BMX; DSG2; FN1; ERBB4
cellular amide metabolic process	Gene Ontology	GO:0043603	5	908	0.164902775539	0.453393975326	UGT8; RPS27; RPL17; LNPEP; AGT
negative regulation of multicellular organismal process	Gene Ontology	GO:0051241	5	954	0.188933715143	0.480900775311	PCM12; PRKG1; ERBB4; FN1; AGT
cellular lipid metabolic process	Gene Ontology	GO:0044255	5	991	0.209109370901	0.500305124538	UGT8; FAR2; AGT; ERBB4; HSPG2
positive regulation of developmental process	Gene Ontology	GO:0051094	5	1079	0.259557182877	0.525485127962	VLDLR; SMAD5; ERBB4; FN1; AGT
anatomical structure formation involved in morphogenesis	Gene Ontology	GO:0048646	5	1111	0.278575750293	0.540079311091	UGT8; PCM12; AGT; FN1; HSPG2
cell junction	Gene Ontology	GO:0030054	5	1119	0.28337396417	0.540079311091	KCTD12; AHNAK; DSG2; FLNC; HSPG2
cytoplasmic transport	Gene Ontology	GO:0016482	5	1128	0.288790511901	0.542592815945	AGT; TNPO1; RPL17; RPS27; ERBB4
cell migration	Gene Ontology	GO:0016477	5	1140	0.296040941797	0.550778735547	PCM12; PRKG1; ERBB4; FN1; AGT
single organism reproductive process	Gene Ontology	GO:0044702	5	1150	0.302105693197	0.555420890185	AGT; SMAD5; SMARCA2; DSG2; LKAP
negative regulation of transcription, DNA-templated	Gene Ontology	GO:0045892	5	1155	0.305145215658	0.557724314824	ZBED6; VLDLR; HCFC1; SMARCA2; ZCCHC11
negative regulation of nucleic acid-templated transcription	Gene Ontology	GO:1903507	5	1195	0.32960396327	0.57255253674	ZBED6; VLDLR; HCFC1; SMARCA2; ZCCHC11
molecular function regulator	Gene Ontology	GO:0098772	5	1197	0.330832414885	0.572741018864	KCNMB2; PRKG1; PLEKHG3; FN1; AGT
enzyme linked receptor protein signaling pathway	Gene Ontology	GO:0007167	5	1203	0.334520265229	0.575117774352	SMAD5; BMX; ERBB4; LNPEP; AGT
negative regulation of RNA biosynthetic process	Gene Ontology	GO:1902679	5	1210	0.338827105991	0.576851769986	ZBED6; VLDLR; HCFC1; SMARCA2; ZCCHC11
cell motility	Gene Ontology	GO:0048870	5	1242	0.358559656192	0.5926548422	PCM12; PRKG1; ERBB4; FN1; AGT
localization of cell	Gene Ontology	GO:0051674	5	1242	0.358559656192	0.5926548422	PCM12; PRKG1; ERBB4; FN1; AGT
negative regulation of RNA metabolic process	Gene Ontology	GO:0051253	5	1249	0.362882397813	0.59465901005	ZBED6; VLDLR; HCFC1; SMARCA2; ZCCHC11
protein complex biogenesis	Gene Ontology	GO:0070271	5	1258	0.368441662734	0.59740350768	KCTD12; HCFC1; TNPO1; FN1; AHNAK
protein complex assembly	Gene Ontology	GO:0006461	5	1258	0.368441662734	0.59740350768	KCTD12; HCFC1; TNPO1; FN1; AHNAK
negative regulation of cellular macromolecule biosynthetic process	Gene Ontology	GO:2000113	5	1328	0.41161522041	0.627996176389	ZBED6; VLDLR; HCFC1; SMARCA2; ZCCHC11
macromolecular complex binding	Gene Ontology	GO:0044877	5	1365	0.434278051268	0.641507208026	VLDLR; HCFC1; SMARCA2; FLNC; FN1
negative regulation of nucleobase-containing compound metabolic process	Gene Ontology	GO:0045934	5	1377	0.441588883591	0.647376799912	ZBED6; VLDLR; HCFC1; SMARCA2; ZCCHC11
negative regulation of macromolecule biosynthetic process	Gene Ontology	GO:0010558	5	1410	0.461568980238	0.662407737064	ZBED6; VLDLR; HCFC1; SMARCA2; ZCCHC11
ATP binding	Gene Ontology	GO:0005524	5	1427	0.471779966974	0.667625128955	BMX; PRKG1; DYNC1H1; SMARCA2; ERBB4
adenyl ribonucleotide binding	Gene Ontology	GO:0032559	5	1462	0.492598677832	0.681957130058	BMX; PRKG1; DYNC1H1; SMARCA2; ERBB4
adenyl nucleotide binding	Gene Ontology	GO:0030554	5	1468	0.49613754001	0.683481501367	BMX; PRKG1; DYNC1H1; SMARCA2; ERBB4
negative regulation of cellular biosynthetic process	Gene Ontology	GO:0031327	5	1470	0.497315090125	0.683481501367	ZBED6; VLDLR; HCFC1; SMARCA2; ZCCHC11
negative regulation of biosynthetic process	Gene Ontology	GO:0009890	5	1490	0.509031674102	0.688309884019	ZBED6; VLDLR; HCFC1; SMARCA2; ZCCHC11
negative regulation of nitrogen compound metabolic process	Gene Ontology	GO:0051172	5	1495	0.511943554408	0.688968246643	ZBED6; VLDLR; HCFC1; SMARCA2; ZCCHC11
negative regulation of gene expression	Gene Ontology	GO:0010629	5	1500	0.51484829955	0.691105324013	ZBED6; VLDLR; HCFC1; SMARCA2; ZCCHC11
proteolysis	Gene Ontology	GO:0006508	5	1525	0.529261163167	0.699029335856	PRTN3; AGT; FN1; LNPEP; USP34
signal transducer activity	Gene Ontology	GO:0004871	5	1563	0.550792455161	0.714186768685	VLDLR; SMAD5; BMX; ERBB4; PTPRZ1
cellular catabolic process	Gene Ontology	GO:0044248	5	1640	0.592880012362	0.743044812334	ZCCHC11; RPS27; RPL17; LNPEP; USP34
regulation of phosphate metabolic process	Gene Ontology	GO:0019220	5	1651	0.598711292866	0.74613735358	VLDLR; AGT; LKAP; FN1; ERBB4
cell cycle	Gene Ontology	GO:0007049	5	1655	0.600820027775	0.74613735358	PCM12; HCFC1; DYNC1H1; LKAP; RPS27
cell projection	Gene Ontology	GO:0042995	5	1660	0.603447076315	0.746939786884	TNPO1; HCFC1; DYNC1H1; BMX; PCM12
regulation of phosphorus metabolic process	Gene Ontology	GO:0051174	5	1664	0.60554158274	0.746939786884	VLDLR; AGT; LKAP; FN1; ERBB4
regulation of protein modification process	Gene Ontology	GO:0031399	5	1704	0.626131710902	0.755011282433	VLDLR; AGT; LKAP; FN1; ERBB4
locomotion	Gene Ontology	GO:0040011	5	1741	0.644588243649	0.76270806988	PCM12; PRKG1; ERBB4; FN1; AGT
regulation of transcription from RNA polymerase II promoter	Gene Ontology	GO:0006357	5	1744	0.646059357081	0.763382663035	VLDLR; SMAD5; HCFC1; SMARCA2; TCF20
purine ribonucleoside triphosphate binding	Gene Ontology	GO:0035639	5	1756	0.651905319772	0.767351804123	BMX; PRKG1; DYNC1H1; SMARCA2; ERBB4
molecular transducer activity	Gene Ontology	GO:0060089	5	1763	0.655286899218	0.769595685276	VLDLR; SMAD5; BMX; ERBB4; PTPRZ1
purine ribonucleoside binding	Gene Ontology	GO:0032550	5	1766	0.656729677463	0.769595685276	BMX; PRKG1; DYNC1H1; SMARCA2; ERBB4
ribonucleoside binding	Gene Ontology	GO:0032549	5	1769	0.658168564663	0.770222892377	BMX; PRKG1; DYNC1H1; SMARCA2; ERBB4
purine nucleoside binding	Gene Ontology	GO:0001883	5	1769	0.658168564663	0.770222892377	BMX; PRKG1; DYNC1H1; SMARCA2; ERBB4
nucleoside binding	Gene Ontology	GO:0001882	5	1776	0.661510802848	0.772014204875	BMX; PRKG1; DYNC1H1; SMARCA2; ERBB4
purine ribonucleotide binding	Gene Ontology	GO:0032555	5	1796	0.670942514019	0.777237349133	BMX; PRKG1; DYNC1H1; SMARCA2; ERBB4
purine nucleotide binding	Gene Ontology	GO:0017076	5	1804	0.674666198018	0.779892164707	BMX; PRKG1; DYNC1H1; SMARCA2; ERBB4
ribonucleotide binding	Gene Ontology	GO:0032553	5	1812	0.678361754738	0.781910075891	BMX; PRKG1; DYNC1H1; SMARCA2; ERBB4
cytoskeleton	Gene Ontology	GO:0005856	5	1894	0.714605968483	0.804271561127	PCM12; DYNC1H1; SMARCA2; FLNC; AHNAK
transcription from RNA polymerase II promoter	Gene Ontology	GO:0006366	5	1929	0.729163885942	0.812473068396	VLDLR; SMAD5; HCFC1; SMARCA2; TCF20
small molecule metabolic process	Gene Ontology	GO:0044281	5	2462	0.887975318402	0.910406130374	UGT8; VLDLR; AGT; FAR2; HSPG2
extracellular matrix component	Gene Ontology	GO:0044420	4	127	0.000844417590196	0.376848857116	PTPRZ1; FREM2; FN1; HSPG2
cardiac muscle tissue development	Gene Ontology	GO:0048738	4	169	0.00234004318557	0.376848857116	ERBB4; AGT; DSG2; HSPG2
cell junction assembly	Gene Ontology	GO:0034329	4	221	0.00593564606381	0.376848857116	UGT8; AGT; FLNC; FN1
striated muscle tissue development	Gene Ontology	GO:0014706	4	324	0.0210073022672	0.376848857116	ERBB4; AGT; DSG2; HSPG2
muscle tissue development	Gene Ontology	GO:0060537	4	337	0.0237943833967	0.376848857116	ERBB4; AGT; DSG2; HSPG2
muscle cell differentiation	Gene Ontology	GO:0042692	4	347	0.0260834038021	0.376848857116	MBNL3; AGT; SMARCA2; FLNC
forebrain development	Gene Ontology	GO:0030900	4	354	0.0277615693738	0.376848857116	VLDLR; PRKG1; ERBB4; PCM12
proteinaceous extracellular matrix	Gene Ontology	GO:0005578	4	354	0.0277615693738	0.376848857116	PTPRZ1; FREM2; FN1; HSPG2
regulation of system process	Gene Ontology	GO:0044057	4	438	0.0528553368153	0.379637910777	KCNMB2; PRKG1; DSG2; AGT
regulation of anatomical structure size	Gene Ontology	GO:0090066	4	448	0.0564529921201	0.384104227651	KCNMB2; PRKG1; AGT; FN1
anchoring junction	Gene Ontology	GO:0070161	4	473	0.066005465015	0.384104227651	AHNAK; DSG2; FLNC; HSPG2
blood coagulation	Gene Ontology	GO:0007596	4	547	0.0987727692645	0.410524520427	KCNMB2; PRKG1; PRTN3; FN1
hemostasis	Gene Ontology	GO:0007599	4	552	0.10121686746	0.41098482478	KCNMB2; PRKG1; PRTN3; FN1
coagulation	Gene Ontology	GO:0050817	4	552	0.10121686746	0.41098482478	KCNMB2; PRKG1; PRTN3; FN1
vasculature development	Gene Ontology	GO:0001944	4	560	0.105184829571	0.413308168225	AGT; SMARCA2; FN1; HSPG2
gamete generation	Gene Ontology	GO:0007276	4	593	0.122274535514	0.424615878649	SMAD5; SMARCA2; LKAP; AGT
developmental process involved in reproduction	Gene Ontology	GO:0003006	4	609	0.130959883783	0.431165804094	SMAD5; SMARCA2; LKAP; AGT
regulation of growth	Gene Ontology	GO:0040008	4	618	0.135954260467	0.437962639696	AGT; SMARCA2; ERBB4; FN1
cation transmembrane transport	Gene Ontology	GO:0098655	4	632	0.143873313929	0.440579717026	KCNMB2; AGT; SLC7A1i1; AHNAK
structural molecule activity	Gene Ontology	GO:0005198	4	695	0.181569060251	0.473545447075	NCR3LG1; RPL17; RPS27; AHNAK
hemopoiesis	Gene Ontology	GO:0030097	4	714	0.193525350023	0.486572586047	SMAD5; BMX; PTPRZ1; PRTN3
regulation of cellular component movement	Gene Ontology	GO:0051270	4	720	0.197350965266	0.492799236509	AGT; DSG2; FN1; ERBB4
single organism cell adhesion	Gene Ontology	GO:0098602	4	732	0.205070060163	0.4989061282	PRKG1; BMX; DSG2; FN1
sexual reproduction	Gene Ontology	GO:0019953	4	737	0.20831206285	0.500305124538	SMAD5; SMARCA2; LKAP; AGT
peptide metabolic process	Gene Ontology	GO:0006518	4	747	0.214839389157	0.503332300493	RPS27; RPL17; LNPEP; AGT
viral process	Gene Ontology	GO:0016032	4	750	0.216808494714	0.503332300493	HCFC1; TNPO1; RPL17; RPS27
hematopoietic or lymphoid organ development	Gene Ontology	GO:0048534	4	755	0.220101160298	0.506329850851	SMAD5; BMX; PTPRZ1; PRTN3
multi-organism cellular process	Gene Ontology	GO:0044764	4	762	0.224732984066	0.508178466761	HCFC1; TNPO1; RPL17; RPS27
negative regulation of developmental process	Gene Ontology	GO:0051093	4	765	0.22672571452	0.508178466761	PCM12; AGT; MBNL3; ERBB4
transcription regulatory region DNA binding	Gene Ontology	GO:0044212	4	771	0.230724534509	0.509218366819	TCF20; SMAD5; SMARCA2; ERBB4
positive regulation of cell differentiation	Gene Ontology	GO:0045597	4	774	0.232730461477	0.509218366819	VLDLR; SMAD5; AGT; FN1
regulatory region DNA binding	Gene Ontology	GO:0000975	4	775	0.233400049242	0.509218366819	TCF20; SMAD5; SMARCA2; ERBB4
regulatory region nucleic acid binding	Gene Ontology	GO:0001067	4	775	0.233400049242	0.509218366819	TCF20; SMAD5; SMARCA2; ERBB4
symbiosis, encompassing mutualism through parasitism	Gene Ontology	GO:0044403	4	788	0.242146163507	0.51566445733	HCFC1; TNPO1; RPL17; RPS27
interspecies interaction between organisms	Gene Ontology	GO:0044419	4	788	0.242146163507	0.51566445733	HCFC1; TNPO1; RPL17; RPS27
response to organic cyclic compound	Gene Ontology	GO:0014070	4	790	0.243498316964	0.51566445733	ZCCHC11; SMAD5; HCFC1; DSG2
positive regulation of cell proliferation	Gene Ontology	GO:0008284	4	790	0.243498316964	0.51566445733	AGT; PRTN3; FN1; ERBB4
immune system development	Gene Ontology	GO:0002520	4	798	0.248923612213	0.521292118288	SMAD5; BMX; PTPRZ1; PRTN3
cell morphogenesis involved in neuron differentiation	Gene Ontology	GO:0048667	4	803	0.252327494898	0.523328728217	VLDLR; PTPRZ1; ERBB4; FN1
positive regulation of hydrolase activity	Gene Ontology	GO:0051345	4	810	0.257109001061	0.525102009355	SNX13; AGT; PLEKHG3; FN1
cell-cell adhesion	Gene Ontology	GO:0098609	4	854	0.287532789014	0.542592815945	PRKG1; FREM2; BMX; DSG2
transferase activity, transferring phosphorus-containing groups	Gene Ontology	GO:0016772	4	894	0.315599026835	0.56143028454	ZCCHC11; PRKG1; BMX; ERBB4
cellular macromolecule catabolic process	Gene Ontology	GO:0044265	4	897	0.317714557313	0.563612968342	ZCCHC11; RPL17; RPS27; USP34
ion transmembrane transport	Gene Ontology	GO:0034220	4	917	0.331843090627	0.574102018088	KCNMB2; AGT; SLC7A1i1; AHNAK
cell activation	Gene Ontology	GO:0001775	4	923	0.336088207923	0.575974101028	PRKG1; BMX; AGT; FN1
growth	Gene Ontology	GO:0040007	4	940	0.348125490574	0.584859973323	AGT; SMARCA2; ERBB4; FN1
embryo development	Gene Ontology	GO:0009790	4	963	0.364416438732	0.595407561558	SMAD5; ERBB4; FN1; HSPG2
positive regulation of transcription from RNA polymerase II promoter	Gene Ontology	GO:0045944	4	989	0.382806940512	0.607596118491	TCF20; SMAD5; HCFC1; SMARCA2
cation transport	Gene Ontology	GO:0006812	4	992	0.384925503673	0.609466140364	KCNMB2; AGT; SLC7A1i1; AHNAK
cell morphogenesis involved in differentiation	Gene Ontology	GO:0000904	4	1005	0.394094638201	0.616709325352	VLDLR; PTPRZ1; ERBB4; FN1
substrate-specific transporter activity	Gene Ontology	GO:0022892	4	1026	0.408858391986	0.625316357926	KCNMB2; VLDLR; TNPO1; SLC7A1i1
cytoskeleton organization	Gene Ontology	GO:0007010	4	1027	0.409559691943	0.625967801732	UGT8; PCM12; PRKG1; DYNC1H1
epithelium development	Gene Ontology	GO:0060429	4	1060	0.43259420776	0.640499935868	SMAD5; FREM2; ERBB4; AGT
zinc ion binding	Gene Ontology	GO:0008270	4	1134	0.483231849334	0.675220284728	TCF20; RPS27; LNPEP; ZCCHC11
regulation of cellular localization	Gene Ontology	GO:0060341	4	1152	0.495281779463	0.683481501367	PCM12; AGT; ERBB4; FN1
transporter activity	Gene Ontology	GO:0005215	4	1208	0.531962536136	0.700866711276	KCNMB2; VLDLR; TNPO1; SLC7A1i1
neurological system process	Gene Ontology	GO:0050877	4	1215	0.536454712959	0.704527324621	KCNMB2; VLDLR; PTPRZ1; AGT
peptidyl-amino acid modification	Gene Ontology	GO:0018193	4	1217	0.537734191656	0.705372752348	AGT; HCFC1; BMX; ERBB4
transmembrane transport	Gene Ontology	GO:0055085	4	1303	0.590962885886	0.742542048294	KCNMB2; AGT; SLC7A1i1; AHNAK
organonitrogen compound biosynthetic process	Gene Ontology	GO:1901566	4	1329	0.606324827971	0.746939786884	UGT8; RPL17; RPS27; HSPG2
regulation of protein phosphorylation	Gene Ontology	GO:0001932	4	1338	0.611559378004	0.747384976092	VLDLR; AGT; ERBB4; FN1
transition metal ion binding	Gene Ontology	GO:0046914	4	1374	0.632061244722	0.756993256559	TCF20; RPS27; LNPEP; ZCCHC11
positive regulation of cellular protein metabolic process	Gene Ontology	GO:0032270	4	1402	0.64751589754	0.764050830646	VLDLR; AGT; ERBB4; FN1
regulation of phosphorylation	Gene Ontology	GO:0042325	4	1426	0.660414917747	0.771439444805	VLDLR; AGT; ERBB4; FN1
integral component of plasma membrane	Gene Ontology	GO:0005887	4	1457	0.676595820756	0.781430427268	KCNMB2; PTPRZ1; LNPEP; SLC7A1i1
ion transport	Gene Ontology	GO:0006811	4	1464	0.680174219822	0.783073156274	KCNMB2; AGT; SLC7A1i1; AHNAK
positive regulation of protein metabolic process	Gene Ontology	GO:0051247	4	1493	0.694702238287	0.792719533584	VLDLR; AGT; ERBB4; FN1
response to oxygen-containing compound	Gene Ontology	GO:1901700	4	1511	0.703478883516	0.795623652353	VLDLR; ERBB4; DSG2; ZCCHC11
intrinsic component of plasma membrane	Gene Ontology	GO:0031226	4	1515	0.705404208789	0.797047530655	KCNMB2; PTPRZ1; LNPEP; SLC7A1i1
regulation of intracellular signal transduction	Gene Ontology	GO:1902531	4	1579	0.734975276962	0.814621492497	AGT; PLEKHG3; FN1; ERBB4
immune response	Gene Ontology	GO:0006955	4	1598	0.743309778152	0.819949569773	NCR3LG1; BMX; ERBB4; IRAK1BP1
response to endogenous stimulus	Gene Ontology	GO:0009719	4	1606	0.746758721071	0.82225849063	VLDLR; SMAD5; DSG2; ERBB4
enzyme binding	Gene Ontology	GO:0019899	4	1621	0.75312966168	0.826503238161	SMAD5; TNPO1; PRTN3; FN1
single-organism biosynthetic process	Gene Ontology	GO:0044711	4	1670	0.773079760209	0.837612265617	UGT8; FAR2; AGT; HSPG2
defense response	Gene Ontology	GO:0006952	4	1735	0.797555587255	0.853313009758	AGT; BMX; ERBB4; FN1
apoptotic process	Gene Ontology	GO:0006915	4	1787	0.815562395856	0.863874501327	AGT; BMX; DSG2; ERBB4
programmed cell death	Gene Ontology	GO:0012501	4	1805	0.8214807332	0.867986047435	AGT; BMX; DSG2; ERBB4
cellular response to stress	Gene Ontology	GO:0033554	4	1836	0.831304782077	0.873991119902	VLDLR; PRKG1; LKAP; AGT
cell death	Gene Ontology	GO:0008219	4	1902	0.85072167995	0.883548064838	AGT; BMX; DSG2; ERBB4
death	Gene Ontology	GO:0016265	4	1902	0.85072167995	0.883548064838	AGT; BMX; DSG2; ERBB4
bounding membrane of organelle	Gene Ontology	GO:0098588	4	2211	0.918195964397	0.933900986859	FAR2; SNX13; LNPEP; AHNAK
basement membrane	Gene Ontology	GO:0005604	3	94	0.00371415479432	0.376848857116	FREM2; FN1; HSPG2
multicellular organismal signaling	Gene Ontology	GO:0035637	3	122	0.00749944495464	0.376848857116	KCNMB2; AGT; DSG2
channel regulator activity	Gene Ontology	GO:0016247	3	126	0.00817266529749	0.376848857116	KCNMB2; PRKG1; AGT
neuron migration	Gene Ontology	GO:0001764	3	131	0.00906263689709	0.376848857116	PCM12; PRKG1; ERBB4
regulation of blood vessel size	Gene Ontology	GO:0050880	3	140	0.0108022360277	0.376848857116	KCNMB2; PRKG1; AGT
regulation of tube size	Gene Ontology	GO:0035150	3	141	0.0110065676653	0.376848857116	KCNMB2; PRKG1; AGT
positive regulation of developmental growth	Gene Ontology	GO:0048639	3	145	0.0118461751497	0.376848857116	AGT; ERBB4; FN1
vascular process in circulatory system	Gene Ontology	GO:0003018	3	164	0.016326901772	0.376848857116	KCNMB2; PRKG1; AGT
female pregnancy	Gene Ontology	GO:0007565	3	178	0.020155916654	0.376848857116	AGT; DSG2; LNPEP
heart contraction	Gene Ontology	GO:0060047	3	185	0.0222395229247	0.376848857116	SMAD5; DSG2; AGT
heart process	Gene Ontology	GO:0003015	3	187	0.0228555723794	0.376848857116	SMAD5; DSG2; AGT
regulation of muscle system process	Gene Ontology	GO:0090257	3	201	0.0274256485599	0.376848857116	PRKG1; DSG2; AGT
cell-cell junction organization	Gene Ontology	GO:0045216	3	215	0.0324447918814	0.376848857116	UGT8; AGT; DSG2
germ cell development	Gene Ontology	GO:0007281	3	216	0.0328203753746	0.376848857116	SMAD5; SMARCA2; LKAP
multi-multicellular organism process	Gene Ontology	GO:0044706	3	220	0.0343453441218	0.376848857116	AGT; DSG2; LNPEP
positive regulation of growth	Gene Ontology	GO:0045927	3	222	0.0351213763576	0.376848857116	AGT; ERBB4; FN1
RNA catabolic process	Gene Ontology	GO:0006401	3	230	0.0383153450331	0.376848857116	ZCCHC11; RPL17; RPS27
regulation of blood circulation	Gene Ontology	GO:1903522	3	233	0.0395499420791	0.376848857116	KCNMB2; AGT; DSG2
ERK1 and ERK2 cascade	Gene Ontology	GO:0070371	3	238	0.0416519576792	0.376848857116	AGT; ERBB4; FN1
protein import into nucleus	Gene Ontology	GO:0006606	3	260	0.0515491190449	0.376848857116	AGT; TNPO1; ERBB4
single-organism nuclear import	Gene Ontology	GO:1902593	3	260	0.0515491190449	0.376848857116	AGT; TNPO1; ERBB4
protein targeting to nucleus	Gene Ontology	GO:0044744	3	260	0.0515491190449	0.376848857116	AGT; TNPO1; ERBB4
nuclear import	Gene Ontology	GO:0051170	3	264	0.0534600326826	0.382241148269	AGT; TNPO1; ERBB4
cellular process involved in reproduction in multicellular organism	Gene Ontology	GO:0022412	3	267	0.0549152908303	0.382241148269	SMAD5; SMARCA2; LKAP
regulation of developmental growth	Gene Ontology	GO:0048638	3	286	0.0645628678241	0.384104227651	AGT; ERBB4; FN1
transcription coactivator activity	Gene Ontology	GO:0003713	3	291	0.0672227766987	0.384104227651	TCF20; HCFC1; SMARCA2
muscle contraction	Gene Ontology	GO:0006936	3	293	0.0683005555141	0.384104227651	SMAD5; PRKG1; AGT
protein import	Gene Ontology	GO:0017038	3	307	0.0760618386668	0.385264978625	AGT; TNPO1; ERBB4
peptidyl-tyrosine phosphorylation	Gene Ontology	GO:0018108	3	314	0.080081655743	0.388274166398	AGT; BMX; ERBB4
peptidyl-tyrosine modification	Gene Ontology	GO:0018212	3	316	0.0812468254928	0.388274166398	AGT; BMX; ERBB4
protein localization to nucleus	Gene Ontology	GO:0034504	3	321	0.0841916516353	0.390962413701	AGT; TNPO1; ERBB4
apical part of cell	Gene Ontology	GO:0045177	3	337	0.0939137057946	0.403592177675	VLDLR; DSG2; FN1
regulation of membrane potential	Gene Ontology	GO:0042391	3	342	0.0970424140041	0.408522849443	KCNMB2; AGT; DSG2
muscle system process	Gene Ontology	GO:0003012	3	352	0.103424435607	0.413290409216	SMAD5; PRKG1; AGT
cellular response to organic cyclic compound	Gene Ontology	GO:0071407	3	365	0.111960680157	0.416926245562	ZCCHC11; SMAD5; HCFC1
regulation of cell growth	Gene Ontology	GO:0001558	3	371	0.115988343766	0.422993856427	AGT; SMARCA2; FN1
vacuolar part	Gene Ontology	GO:0044437	3	373	0.117342870532	0.422993856427	AHNAK; LNPEP; HSPG2
focal adhesion	Gene Ontology	GO:0005925	3	377	0.12006957322	0.424088445107	AHNAK; FLNC; HSPG2
extracellular matrix organization	Gene Ontology	GO:0030198	3	380	0.122129839816	0.424615878649	AGT; FN1; HSPG2
extracellular structure organization	Gene Ontology	GO:0043062	3	381	0.122819463631	0.424615878649	AGT; FN1; HSPG2
cell-substrate adherens junction	Gene Ontology	GO:0005924	3	382	0.123510510794	0.424615878649	AHNAK; FLNC; HSPG2
nucleobase-containing compound catabolic process	Gene Ontology	GO:0034655	3	383	0.124202974825	0.424615878649	ZCCHC11; RPL17; RPS27
cell-substrate junction	Gene Ontology	GO:0030055	3	386	0.126288803286	0.427039824542	AHNAK; FLNC; HSPG2
angiogenesis	Gene Ontology	GO:0001525	3	400	0.136185353776	0.437962639696	AGT; FN1; HSPG2
nucleocytoplasmic transport	Gene Ontology	GO:0006913	3	411	0.144140845891	0.440870984381	AGT; TNPO1; ERBB4
nuclear transport	Gene Ontology	GO:0051169	3	415	0.147071058538	0.443367581152	AGT; TNPO1; ERBB4
heterocycle catabolic process	Gene Ontology	GO:0046700	3	427	0.155975469707	0.449838739055	ZCCHC11; RPL17; RPS27
cellular nitrogen compound catabolic process	Gene Ontology	GO:0044270	3	427	0.155975469707	0.449838739055	ZCCHC11; RPL17; RPS27
aromatic compound catabolic process	Gene Ontology	GO:0019439	3	435	0.162002415821	0.453225883138	ZCCHC11; RPL17; RPS27
negative regulation of transport	Gene Ontology	GO:0051051	3	441	0.166567884099	0.456010791907	AGT; PRTN3; FN1
adherens junction	Gene Ontology	GO:0005912	3	454	0.176585706765	0.467906375335	AHNAK; FLNC; HSPG2
organic cyclic compound catabolic process	Gene Ontology	GO:1901361	3	463	0.183616245326	0.474249231614	ZCCHC11; RPL17; RPS27
cell growth	Gene Ontology	GO:0016049	3	468	0.187553748328	0.480059778258	AGT; SMARCA2; FN1
blood vessel morphogenesis	Gene Ontology	GO:0048514	3	474	0.192307221308	0.48589877953	AGT; FN1; HSPG2
homotypic cell-cell adhesion	Gene Ontology	GO:0034109	3	492	0.206741140367	0.499185170838	PRKG1; BMX; DSG2
lysosome	Gene Ontology	GO:0005764	3	498	0.211605906394	0.500996576527	AHNAK; LNPEP; HSPG2
lytic vacuole	Gene Ontology	GO:0000323	3	499	0.212419124402	0.501605852589	AHNAK; LNPEP; HSPG2
transcription cofactor activity	Gene Ontology	GO:0003712	3	522	0.231298028453	0.509218366819	TCF20; HCFC1; SMARCA2
organelle assembly	Gene Ontology	GO:0070925	3	528	0.236273054545	0.511680672182	PCM12; DYNC1H1; RPS27
blood vessel development	Gene Ontology	GO:0001568	3	539	0.245440702174	0.515687654444	AGT; FN1; HSPG2
regulation of GTPase activity	Gene Ontology	GO:0043087	3	547	0.252142591464	0.523328728217	SNX13; PRKG1; PLEKHG3
regulation of cytokine production	Gene Ontology	GO:0001817	3	550	0.254662632741	0.524384132894	ZCCHC11; AGT; FN1
developmental growth	Gene Ontology	GO:0048589	3	560	0.263087252648	0.529423084997	AGT; ERBB4; FN1
transcription factor activity, transcription factor binding	Gene Ontology	GO:0000989	3	563	0.265621434578	0.530516271294	TCF20; HCFC1; SMARCA2
peptidase activity, acting on L-amino acid peptides	Gene Ontology	GO:0070011	3	565	0.267312501262	0.531920673718	PRTN3; LNPEP; USP34
inorganic cation transmembrane transport	Gene Ontology	GO:0098662	3	566	0.268158502717	0.532508297863	KCNMB2; AGT; AHNAK
transcription factor activity, protein binding	Gene Ontology	GO:0000988	3	567	0.269004809385	0.532508297863	TCF20; HCFC1; SMARCA2
negative regulation of cell differentiation	Gene Ontology	GO:0045596	3	580	0.280032253803	0.540079311091	PCM12; MBNL3; ERBB4
positive regulation of protein kinase activity	Gene Ontology	GO:0045860	3	581	0.280882300652	0.540079311091	VLDLR; AGT; ERBB4
vacuole	Gene Ontology	GO:0005773	3	583	0.282583078266	0.540079311091	AHNAK; LNPEP; HSPG2
protein kinase activity	Gene Ontology	GO:0004672	3	584	0.283433799174	0.540079311091	PRKG1; BMX; ERBB4
chromatin modification	Gene Ontology	GO:0016568	3	584	0.283433799174	0.540079311091	HCFC1; SMARCA2; USP34
peptidase activity	Gene Ontology	GO:0008233	3	585	0.284284734933	0.540079311091	PRTN3; LNPEP; USP34
cytokine production	Gene Ontology	GO:0001816	3	603	0.299632800802	0.55382137773	ZCCHC11; AGT; FN1
positive regulation of kinase activity	Gene Ontology	GO:0033674	3	606	0.302195462906	0.555420890185	VLDLR; AGT; ERBB4
mRNA metabolic process	Gene Ontology	GO:0016071	3	610	0.305613867273	0.558181899011	MBNL3; RPL17; RPS27
regulation of cell migration	Gene Ontology	GO:0030334	3	612	0.307323639001	0.558421603599	AGT; ERBB4; FN1
lipid biosynthetic process	Gene Ontology	GO:0008610	3	617	0.311599438232	0.560703563377	UGT8; FAR2; AGT
negative regulation of cell proliferation	Gene Ontology	GO:0008285	3	623	0.316732339648	0.56281069665	AGT; SMARCA2; ERBB4
inorganic ion transmembrane transport	Gene Ontology	GO:0098660	3	646	0.336411609811	0.575974101028	KCNMB2; AGT; AHNAK
regulation of cell motility	Gene Ontology	GO:2000145	3	649	0.338977077256	0.576851769986	AGT; ERBB4; FN1
calcium ion binding	Gene Ontology	GO:0005509	3	654	0.343251291959	0.580485154457	VLDLR; FREM2; DSG2
cellular response to nitrogen compound	Gene Ontology	GO:1901699	3	667	0.354351853217	0.588744437086	VLDLR; ERBB4; ZCCHC11
positive regulation of transferase activity	Gene Ontology	GO:0051347	3	676	0.362022926332	0.594154443281	VLDLR; AGT; ERBB4
mitochondrion organization	Gene Ontology	GO:0007005	3	678	0.363725730042	0.59465901005	PRKG1; HCFC1; ERBB4
phosphotransferase activity, alcohol group as acceptor	Gene Ontology	GO:0016773	3	688	0.372227964489	0.598984836501	PRKG1; BMX; ERBB4
single organismal cell-cell adhesion	Gene Ontology	GO:0016337	3	688	0.372227964489	0.598984836501	PRKG1; BMX; DSG2
regulation of protein transport	Gene Ontology	GO:0051223	3	698	0.380707955579	0.606523515524	PCM12; ERBB4; FN1
amide biosynthetic process	Gene Ontology	GO:0043604	3	703	0.384938528232	0.609466140364	UGT8; RPL17; RPS27
regulation of locomotion	Gene Ontology	GO:0040012	3	708	0.389162258383	0.613327229558	AGT; ERBB4; FN1
behavior	Gene Ontology	GO:0007610	3	716	0.395904973074	0.617273790335	VLDLR; PTPRZ1; AGT
negative regulation of transcription from RNA polymerase II promoter	Gene Ontology	GO:0000122	3	720	0.399268854806	0.618745734388	VLDLR; HCFC1; SMARCA2
axonogenesis	Gene Ontology	GO:0007409	3	722	0.400948838802	0.620972853312	PTPRZ1; ERBB4; FN1
chromatin organization	Gene Ontology	GO:0006325	3	731	0.408491863067	0.625316357926	HCFC1; SMARCA2; USP34
axon development	Gene Ontology	GO:0061564	3	747	0.421828037097	0.632302181429	PTPRZ1; ERBB4; FN1
kinase activity	Gene Ontology	GO:0016301	3	754	0.427630509154	0.63779558645	PRKG1; BMX; ERBB4
regulation of establishment of protein localization	Gene Ontology	GO:0070201	3	758	0.43093688799	0.639898735534	PCM12; ERBB4; FN1
regulation of MAPK cascade	Gene Ontology	GO:0043408	3	760	0.432587466356	0.640499935868	AGT; ERBB4; FN1
metal ion transport	Gene Ontology	GO:0030001	3	770	0.440813415792	0.647110161956	KCNMB2; AGT; AHNAK
RNA processing	Gene Ontology	GO:0006396	3	789	0.456311901831	0.659778419756	ZCCHC11; MBNL3; AHNAK
response to lipid	Gene Ontology	GO:0033993	3	795	0.46116845703	0.662407737064	VLDLR; DSG2; ZCCHC11
cellular macromolecular complex assembly	Gene Ontology	GO:0034622	3	810	0.47322594818	0.668529695854	DYNC1H1; TNPO1; RPS27
MAPK cascade	Gene Ontology	GO:0000165	3	828	0.487528673947	0.678612313165	AGT; ERBB4; FN1
regulation of protein kinase activity	Gene Ontology	GO:0045859	3	832	0.490681356024	0.680407932404	VLDLR; AGT; ERBB4
regulation of response to external stimulus	Gene Ontology	GO:0032101	3	849	0.503971742603	0.686470329295	ZCCHC11; PRKG1; AGT
positive regulation of transport	Gene Ontology	GO:0051050	3	851	0.505523515863	0.686470329295	PCM12; AGT; ERBB4
cellular response to growth factor stimulus	Gene Ontology	GO:0071363	3	855	0.508619456207	0.688309884019	SMAD5; ERBB4; AGT
signal transduction by protein phosphorylation	Gene Ontology	GO:0023014	3	858	0.510934705855	0.688697966722	AGT; ERBB4; FN1
regulation of kinase activity	Gene Ontology	GO:0043549	3	876	0.524703094904	0.695887094764	VLDLR; AGT; ERBB4
response to growth factor	Gene Ontology	GO:0070848	3	877	0.525461715188	0.695887094764	SMAD5; ERBB4; AGT
regulation of protein localization	Gene Ontology	GO:0032880	3	880	0.527733541291	0.697732505213	PCM12; ERBB4; FN1
small GTPase mediated signal transduction	Gene Ontology	GO:0007264	3	895	0.539000757891	0.705784672555	PLEKHG3; RPS27; ERBB4
transmembrane receptor protein tyrosine kinase signaling pathway	Gene Ontology	GO:0007169	3	900	0.542721967609	0.708217582381	AGT; BMX; ERBB4
positive regulation of protein phosphorylation	Gene Ontology	GO:0001934	3	954	0.581767496545	0.73679023708	VLDLR; AGT; ERBB4
response to nitrogen compound	Gene Ontology	GO:1901698	3	981	0.600477019971	0.74613735358	VLDLR; ERBB4; ZCCHC11
response to hormone	Gene Ontology	GO:0009725	3	987	0.604558974398	0.746939786884	VLDLR; DSG2; ERBB4
negative regulation of cellular protein metabolic process	Gene Ontology	GO:0032269	3	987	0.604558974398	0.746939786884	ZCCHC11; AGT; LKAP
mitotic cell cycle	Gene Ontology	GO:0000278	3	987	0.604558974398	0.746939786884	PCM12; DYNC1H1; RPS27
positive regulation of phosphorylation	Gene Ontology	GO:0042327	3	990	0.606589534436	0.746939786884	VLDLR; AGT; ERBB4
cellular response to oxygen-containing compound	Gene Ontology	GO:1901701	3	992	0.60793937366	0.746939786884	VLDLR; ERBB4; ZCCHC11
regulation of transferase activity	Gene Ontology	GO:0051338	3	993	0.608613131575	0.746939786884	VLDLR; AGT; ERBB4
membrane organization	Gene Ontology	GO:0061024	3	999	0.612639385955	0.747384976092	RPS27; RPL17; LNPEP
catalytic complex	Gene Ontology	GO:1902494	3	1019	0.625857525737	0.755011282433	HCFC1; DYNC1H1; USP34
secretion	Gene Ontology	GO:0046903	3	1033	0.634923531671	0.758588485852	AGT; ERBB4; FN1
positive regulation of cellular component organization	Gene Ontology	GO:0051130	3	1041	0.640034723541	0.760326826433	VLDLR; AGT; FN1
chromosome organization	Gene Ontology	GO:0051276	3	1043	0.641304619088	0.760582519021	HCFC1; SMARCA2; USP34
negative regulation of molecular function	Gene Ontology	GO:0044092	3	1050	0.645724328286	0.763345865662	ZCCHC11; AGT; LKAP
negative regulation of protein metabolic process	Gene Ontology	GO:0051248	3	1051	0.646352548092	0.763382663035	ZCCHC11; AGT; LKAP
oxoacid metabolic process	Gene Ontology	GO:0043436	3	1082	0.665433943052	0.774471821749	UGT8; AGT; HSPG2
organic acid metabolic process	Gene Ontology	GO:0006082	3	1096	0.67380129703	0.7792446479	UGT8; AGT; HSPG2
positive regulation of phosphate metabolic process	Gene Ontology	GO:0045937	3	1103	0.677926655989	0.781893757043	VLDLR; AGT; ERBB4
positive regulation of phosphorus metabolic process	Gene Ontology	GO:0010562	3	1103	0.677926655989	0.781893757043	VLDLR; AGT; ERBB4
response to abiotic stimulus	Gene Ontology	GO:0009628	3	1114	0.684330908413	0.784979185786	VLDLR; AGT; HSPG2
nucleic acid binding transcription factor activity	Gene Ontology	GO:0001071	3	1133	0.695167451376	0.792719533584	TCF20; SMAD5; HCFC1
transcription factor activity, sequence-specific DNA binding	Gene Ontology	GO:0003700	3	1133	0.695167451376	0.792719533584	TCF20; SMAD5; HCFC1
neuron part	Gene Ontology	GO:0097458	3	1143	0.700756612274	0.794252951057	KCTD12; HCFC1; SMARCA2
cell-cell signaling	Gene Ontology	GO:0007267	3	1148	0.703521735616	0.795623652353	KCNMB2; AGT; LNPEP
positive regulation of protein modification process	Gene Ontology	GO:0031401	3	1149	0.704072407938	0.795894406321	VLDLR; AGT; ERBB4
identical protein binding	Gene Ontology	GO:0042802	3	1156	0.707905193397	0.799167143274	PCM12; HCFC1; ERBB4
transmembrane signaling receptor activity	Gene Ontology	GO:0004888	3	1185	0.723377259436	0.809276024836	VLDLR; PTPRZ1; ERBB4
cellular response to endogenous stimulus	Gene Ontology	GO:0071495	3	1207	0.734681641312	0.814621492497	VLDLR; SMAD5; ERBB4
cell cycle process	Gene Ontology	GO:0022402	3	1246	0.753818448198	0.826549644958	PCM12; DYNC1H1; LKAP
vesicle-mediated transport	Gene Ontology	GO:0016192	3	1268	0.764113619245	0.831500812614	VLDLR; PRTN3; FN1
signaling receptor activity	Gene Ontology	GO:0038023	3	1285	0.771826766723	0.837319067675	VLDLR; PTPRZ1; ERBB4
negative regulation of response to stimulus	Gene Ontology	GO:0048585	3	1318	0.786208545012	0.844685700179	SNX13; PRKG1; AGT
receptor binding	Gene Ontology	GO:0005102	3	1394	0.816478479561	0.864486737986	AGT; ERBB4; FN1
positive regulation of signal transduction	Gene Ontology	GO:0009967	3	1396	0.817223357046	0.864917269853	AGT; USP34; ERBB4
receptor activity	Gene Ontology	GO:0004872	3	1487	0.84848510959	0.883548064838	VLDLR; PTPRZ1; ERBB4
positive regulation of signaling	Gene Ontology	GO:0023056	3	1537	0.863597558535	0.892209679666	AGT; USP34; ERBB4
positive regulation of cell communication	Gene Ontology	GO:0010647	3	1553	0.868145296517	0.895460880675	AGT; USP34; ERBB4
positive regulation of response to stimulus	Gene Ontology	GO:0048584	3	1939	0.943898959678	0.952466314087	AGT; USP34; ERBB4
costamere	Gene Ontology	GO:0043034	2	20	0.0022059099063	0.376848857116	FLNC; AHNAK
basal lamina	Gene Ontology	GO:0005605	2	22	0.00262461686617	0.376848857116	FN1; HSPG2
SAGA-type complex	Gene Ontology	GO:0070461	2	32	0.00522443701927	0.376848857116	HCFC1; USP34
positive regulation of organ growth	Gene Ontology	GO:0046622	2	35	0.00616355902721	0.376848857116	AGT; ERBB4
smooth muscle cell differentiation	Gene Ontology	GO:0051145	2	47	0.0106147417921	0.376848857116	AGT; SMARCA2
cardiac muscle tissue growth	Gene Ontology	GO:0055017	2	52	0.0127828931725	0.376848857116	AGT; ERBB4
regulation of plasma lipoprotein particle levels	Gene Ontology	GO:0097006	2	55	0.0141683021791	0.376848857116	VLDLR; AGT
cardiac conduction	Gene Ontology	GO:0061337	2	57	0.0151263134703	0.376848857116	AGT; DSG2
positive regulation of fibroblast proliferation	Gene Ontology	GO:0048146	2	58	0.0156154967425	0.376848857116	AGT; FN1
heart growth	Gene Ontology	GO:0060419	2	59	0.0161114016636	0.376848857116	AGT; ERBB4
embryonic pattern specification	Gene Ontology	GO:0009880	2	59	0.0161114016636	0.376848857116	SMAD5; ERBB4
positive regulation of phosphatidylinositol 3-kinase signaling	Gene Ontology	GO:0014068	2	60	0.016613980948	0.376848857116	AGT; ERBB4
SMAD protein signal transduction	Gene Ontology	GO:0060395	2	60	0.016613980948	0.376848857116	SMAD5; LNPEP
cellular component disassembly involved in execution phase of apoptosis	Gene Ontology	GO:0006921	2	62	0.0176389746192	0.376848857116	BMX; DSG2
cell-cell contact zone	Gene Ontology	GO:0044291	2	62	0.0176389746192	0.376848857116	DSG2; AHNAK
vasodilation	Gene Ontology	GO:0042311	2	65	0.0192253539599	0.376848857116	PRKG1; AGT
regulation of vasoconstriction	Gene Ontology	GO:0019229	2	65	0.0192253539599	0.376848857116	KCNMB2; AGT
peripheral nervous system development	Gene Ontology	GO:0007422	2	69	0.0214298524752	0.376848857116	UGT8; AGT
transmission of nerve impulse	Gene Ontology	GO:0019226	2	71	0.022569567007	0.376848857116	KCNMB2; AGT
positive regulation of JAK-STAT cascade	Gene Ontology	GO:0046427	2	72	0.0231486336176	0.376848857116	AGT; ERBB4
regulation of organ growth	Gene Ontology	GO:0046620	2	73	0.0237337805804	0.376848857116	AGT; ERBB4
regulation of phosphatidylinositol 3-kinase signaling	Gene Ontology	GO:0014066	2	77	0.0261342925309	0.376848857116	AGT; ERBB4
vasoconstriction	Gene Ontology	GO:0042310	2	82	0.0292665084206	0.376848857116	KCNMB2; AGT
regulation of heart rate	Gene Ontology	GO:0002027	2	83	0.0299100671701	0.376848857116	AGT; DSG2
histone acetyltransferase complex	Gene Ontology	GO:0000123	2	85	0.0312139630051	0.376848857116	HCFC1; USP34
regulation of fibroblast proliferation	Gene Ontology	GO:0048145	2	86	0.0318742167227	0.376848857116	AGT; FN1
fibroblast proliferation	Gene Ontology	GO:0048144	2	88	0.0332111288916	0.376848857116	AGT; FN1
execution phase of apoptosis	Gene Ontology	GO:0097194	2	89	0.033887705214	0.376848857116	BMX; DSG2
regulation of RNA splicing	Gene Ontology	GO:0043484	2	92	0.0359494266501	0.376848857116	MBNL3; AHNAK
cell-cell junction assembly	Gene Ontology	GO:0007043	2	93	0.0366471967787	0.376848857116	UGT8; AGT
protein transporter activity	Gene Ontology	GO:0008565	2	94	0.0373501649827	0.376848857116	VLDLR; TNPO1
smooth muscle contraction	Gene Ontology	GO:0006939	2	95	0.038058291513	0.376848857116	PRKG1; AGT
protein acetyltransferase complex	Gene Ontology	GO:0031248	2	95	0.038058291513	0.376848857116	HCFC1; USP34
acetyltransferase complex	Gene Ontology	GO:1902493	2	95	0.038058291513	0.376848857116	HCFC1; USP34
ureteric bud development	Gene Ontology	GO:0001657	2	96	0.0387715368193	0.376848857116	SMAD5; AGT
mesonephric tubule development	Gene Ontology	GO:0072164	2	97	0.0394898615494	0.376848857116	SMAD5; AGT
mesonephric epithelium development	Gene Ontology	GO:0072163	2	97	0.0394898615494	0.376848857116	SMAD5; AGT
mesonephros development	Gene Ontology	GO:0001823	2	101	0.0424131745574	0.376848857116	SMAD5; AGT
phosphatidylinositol 3-kinase signaling	Gene Ontology	GO:0014065	2	102	0.0431563130035	0.376848857116	AGT; ERBB4
cytosolic ribosome	Gene Ontology	GO:0022626	2	104	0.0446570941852	0.376848857116	RPL17; RPS27
SRP-dependent cotranslational protein targeting to membrane	Gene Ontology	GO:0006614	2	105	0.0454146611352	0.376848857116	RPL17; RPS27
female gamete generation	Gene Ontology	GO:0007292	2	106	0.0461769621192	0.376848857116	AGT; LKAP
cotranslational protein targeting to membrane	Gene Ontology	GO:0006613	2	107	0.0469439597204	0.376848857116	RPL17; RPS27
protein targeting to ER	Gene Ontology	GO:0045047	2	109	0.048491896052	0.376848857116	RPL17; RPS27
sarcolemma	Gene Ontology	GO:0042383	2	110	0.0492727608905	0.376848857116	FLNC; AHNAK
blood microparticle	Gene Ontology	GO:0072562	2	113	0.0516425026622	0.376848857116	AGT; FN1
establishment of protein localization to endoplasmic reticulum	Gene Ontology	GO:0072599	2	113	0.0516425026622	0.376848857116	RPL17; RPS27
positive regulation of lipid metabolic process	Gene Ontology	GO:0045834	2	117	0.0548641520677	0.382241148269	AGT; ERBB4
nuclear-transcribed mRNA catabolic process, nonsense-mediated decay	Gene Ontology	GO:0000184	2	118	0.0556803964175	0.382727886128	RPL17; RPS27
action potential	Gene Ontology	GO:0001508	2	119	0.0565009028908	0.384104227651	KCNMB2; DSG2
peroxisome	Gene Ontology	GO:0005777	2	124	0.0606661475289	0.384104227651	FAR2; LKAP
microbody	Gene Ontology	GO:0042579	2	124	0.0606661475289	0.384104227651	FAR2; LKAP
extracellular matrix disassembly	Gene Ontology	GO:0022617	2	125	0.0615114974769	0.384104227651	FN1; HSPG2
receptor signaling protein activity	Gene Ontology	GO:0005057	2	130	0.0657978842639	0.384104227651	SMAD5; ERBB4
organ growth	Gene Ontology	GO:0035265	2	131	0.0666668549182	0.384104227651	AGT; ERBB4
protein localization to endoplasmic reticulum	Gene Ontology	GO:0070972	2	132	0.0675396461004	0.384104227651	RPL17; RPS27
neural precursor cell proliferation	Gene Ontology	GO:0061351	2	132	0.0675396461004	0.384104227651	PCM12; PTPRZ1
striated muscle cell development	Gene Ontology	GO:0055002	2	133	0.0684162250485	0.384104227651	AGT; FLNC
muscle cell proliferation	Gene Ontology	GO:0033002	2	134	0.0692965591693	0.384104227651	AGT; ERBB4
protein tyrosine kinase activity	Gene Ontology	GO:0004713	2	135	0.0701806160376	0.384104227651	BMX; ERBB4
regulation of JAK-STAT cascade	Gene Ontology	GO:0046425	2	135	0.0701806160376	0.384104227651	AGT; ERBB4
kidney epithelium development	Gene Ontology	GO:0072073	2	137	0.071959769151	0.384104227651	SMAD5; AGT
cellular response to lipopolysaccharide	Gene Ontology	GO:0071222	2	140	0.0746556183712	0.385264978625	VLDLR; ZCCHC11
muscle cell development	Gene Ontology	GO:0055001	2	146	0.0801418352173	0.388274166398	AGT; FLNC
cellular response to molecule of bacterial origin	Gene Ontology	GO:0071219	2	147	0.0810680960218	0.388274166398	VLDLR; ZCCHC11
JAK-STAT cascade	Gene Ontology	GO:0007259	2	148	0.0819976729977	0.388274166398	AGT; ERBB4
homophilic cell adhesion via plasma membrane adhesion molecules	Gene Ontology	GO:0007156	2	149	0.0829305359951	0.390962413701	FREM2; DSG2
positive regulation of peptidyl-tyrosine phosphorylation	Gene Ontology	GO:0050731	2	150	0.0838666550213	0.390962413701	AGT; ERBB4
cytokine secretion	Gene Ontology	GO:0050663	2	152	0.0857485419713	0.392625107903	AGT; FN1
stem cell population maintenance	Gene Ontology	GO:0019827	2	154	0.0876430970242	0.392703442468	ZCCHC11; PCM12
maintenance of cell number	Gene Ontology	GO:0098727	2	155	0.0885950517585	0.39535348577	ZCCHC11; PCM12
ribosomal subunit	Gene Ontology	GO:0044391	2	158	0.0914692764818	0.401178284672	RPL17; RPS27
regulation of muscle contraction	Gene Ontology	GO:0006937	2	159	0.0924333756971	0.402062161328	PRKG1; DSG2
regulation of cation transmembrane transport	Gene Ontology	GO:1904062	2	160	0.0934004395106	0.402062161328	AGT; AHNAK
regulation of heart contraction	Gene Ontology	GO:0008016	2	163	0.096319136202	0.407761641173	AGT; DSG2
antigen processing and presentation of exogenous peptide antigen	Gene Ontology	GO:0002478	2	163	0.096319136202	0.407761641173	DYNC1H1; LNPEP
cellular response to biotic stimulus	Gene Ontology	GO:0071216	2	164	0.097297776813	0.408522849443	VLDLR; ZCCHC11
glial cell differentiation	Gene Ontology	GO:0010001	2	165	0.098279241965	0.410524520427	PTPRZ1; AGT
negative regulation of cell growth	Gene Ontology	GO:0030308	2	165	0.098279241965	0.410524520427	AGT; SMARCA2
bone development	Gene Ontology	GO:0060348	2	166	0.0992635040887	0.410706763681	SMAD5; HSPG2
regulation of ion transmembrane transporter activity	Gene Ontology	GO:0032412	2	168	0.101240309703	0.41098482478	AGT; AHNAK
antigen processing and presentation of exogenous antigen	Gene Ontology	GO:0019884	2	170	0.103227976005	0.413290409216	DYNC1H1; LNPEP
dendrite development	Gene Ontology	GO:0016358	2	171	0.104225814528	0.413290409216	VLDLR; PRKG1
regulation of transmembrane transporter activity	Gene Ontology	GO:0022898	2	172	0.105226287648	0.413308168225	AGT; AHNAK
regulation of blood pressure	Gene Ontology	GO:0008217	2	172	0.105226287648	0.413308168225	AGT; LNPEP
developmental cell growth	Gene Ontology	GO:0048588	2	174	0.107235031566	0.414837285484	AGT; FN1
translational termination	Gene Ontology	GO:0006415	2	175	0.108243249665	0.416834321377	RPL17; RPS27
cartilage development	Gene Ontology	GO:0051216	2	179	0.112301154686	0.416926245562	SMAD5; HSPG2
cell adhesion molecule binding	Gene Ontology	GO:0050839	2	180	0.113321760135	0.416926245562	DSG2; FN1
G2/M transition of mitotic cell cycle	Gene Ontology	GO:0000086	2	180	0.113321760135	0.416926245562	PCM12; DYNC1H1
antigen processing and presentation of peptide antigen	Gene Ontology	GO:0048002	2	182	0.115370147445	0.422993856427	DYNC1H1; LNPEP
cell cycle G2/M phase transition	Gene Ontology	GO:0044839	2	184	0.117427935235	0.422993856427	PCM12; DYNC1H1
viral transcription	Gene Ontology	GO:0019083	2	184	0.117427935235	0.422993856427	RPL17; RPS27
regulation of transporter activity	Gene Ontology	GO:0032409	2	185	0.118460291792	0.422993856427	AGT; AHNAK
cell-matrix adhesion	Gene Ontology	GO:0007160	2	187	0.120531806366	0.424088445107	AGT; FN1
nuclear-transcribed mRNA catabolic process	Gene Ontology	GO:0000956	2	188	0.121570915238	0.424088445107	RPL17; RPS27
protein targeting to membrane	Gene Ontology	GO:0006612	2	188	0.121570915238	0.424088445107	RPL17; RPS27
ribonucleoprotein complex assembly	Gene Ontology	GO:0022618	2	192	0.125749127432	0.427039824542	DYNC1H1; RPS27
phosphatidylinositol-mediated signaling	Gene Ontology	GO:0048015	2	193	0.126799004425	0.427039824542	AGT; ERBB4
positive regulation of neuron projection development	Gene Ontology	GO:0010976	2	194	0.127850963359	0.428968799824	VLDLR; FN1
viral gene expression	Gene Ontology	GO:0019080	2	195	0.12890498064	0.428968799824	RPL17; RPS27
inositol lipid-mediated signaling	Gene Ontology	GO:0048017	2	195	0.12890498064	0.428968799824	AGT; ERBB4
regulation of calcium ion transport	Gene Ontology	GO:0051924	2	197	0.131019096512	0.431165804094	AGT; AHNAK
contractile fiber part	Gene Ontology	GO:0044449	2	197	0.131019096512	0.431165804094	FLNC; AHNAK
peptidase regulator activity	Gene Ontology	GO:0061134	2	200	0.134205125439	0.43714968885	AGT; FN1
microtubule-based movement	Gene Ontology	GO:0007018	2	200	0.134205125439	0.43714968885	PCM12; DYNC1H1
mRNA catabolic process	Gene Ontology	GO:0006402	2	201	0.135271004487	0.437477017485	RPL17; RPS27
structural constituent of ribosome	Gene Ontology	GO:0003735	2	202	0.136338780289	0.437962639696	RPL17; RPS27
ribonucleoprotein complex subunit organization	Gene Ontology	GO:0071826	2	202	0.136338780289	0.437962639696	DYNC1H1; RPS27
regulation of peptidyl-tyrosine phosphorylation	Gene Ontology	GO:0050730	2	202	0.136338780289	0.437962639696	AGT; ERBB4
myofibril	Gene Ontology	GO:0030016	2	203	0.137408430259	0.438537125545	FLNC; AHNAK
multi-organism metabolic process	Gene Ontology	GO:0044033	2	204	0.138479931938	0.439321570675	RPL17; RPS27
translational elongation	Gene Ontology	GO:0006414	2	205	0.139553262988	0.440579717026	RPL17; RPS27
cytosolic part	Gene Ontology	GO:0044445	2	206	0.140628401195	0.440579717026	RPL17; RPS27
cell-cell adhesion via plasma-membrane adhesion molecules	Gene Ontology	GO:0098742	2	209	0.143864438439	0.440579717026	FREM2; DSG2
gliogenesis	Gene Ontology	GO:0042063	2	209	0.143864438439	0.440579717026	PTPRZ1; AGT
ribosome	Gene Ontology	GO:0005840	2	213	0.148203128488	0.443367581152	RPL17; RPS27
contractile fiber	Gene Ontology	GO:0043292	2	214	0.149291938745	0.443367581152	FLNC; AHNAK
negative regulation of neurogenesis	Gene Ontology	GO:0050768	2	217	0.152567961447	0.447739339131	PCM12; ERBB4
learning or memory	Gene Ontology	GO:0007611	2	219	0.154759761115	0.449838739055	VLDLR; PTPRZ1
second-messenger-mediated signaling	Gene Ontology	GO:0019932	2	219	0.154759761115	0.449838739055	PRKG1; AGT
protein autophosphorylation	Gene Ontology	GO:0046777	2	220	0.155857934295	0.449838739055	BMX; ERBB4
antigen processing and presentation	Gene Ontology	GO:0019882	2	223	0.159161302255	0.452615237655	DYNC1H1; LNPEP
telencephalon development	Gene Ontology	GO:0021537	2	224	0.160265307	0.452615237655	VLDLR; ERBB4
regulation of ERK1 and ERK2 cascade	Gene Ontology	GO:0070372	2	225	0.161370719383	0.453225883138	ERBB4; FN1
peptide binding	Gene Ontology	GO:0042277	2	226	0.162477519525	0.453225883138	TNPO1; LNPEP
connective tissue development	Gene Ontology	GO:0061448	2	228	0.164695204137	0.453393975326	SMAD5; HSPG2
negative regulation of growth	Gene Ontology	GO:0045926	2	233	0.170262331389	0.460212242455	AGT; SMARCA2
positive regulation of intracellular protein transport	Gene Ontology	GO:0090316	2	234	0.171379531298	0.462742831604	PCM12; ERBB4
negative regulation of nervous system development	Gene Ontology	GO:0051961	2	236	0.173617553787	0.464372473883	PCM12; ERBB4
striated muscle cell differentiation	Gene Ontology	GO:0051146	2	239	0.176983364009	0.467990136267	AGT; FLNC
platelet activation	Gene Ontology	GO:0030168	2	244	0.18261522572	0.473545447075	PRKG1; FN1
cellular response to external stimulus	Gene Ontology	GO:0071496	2	246	0.184875310909	0.476538477818	VLDLR; AGT
amide binding	Gene Ontology	GO:0033218	2	248	0.18713937745	0.479955253902	TNPO1; LNPEP
cell fate commitment	Gene Ontology	GO:0045165	2	250	0.189407285428	0.481425873597	SMAD5; ERBB4
cognition	Gene Ontology	GO:0050890	2	252	0.19167889653	0.484865872034	VLDLR; PTPRZ1
translational initiation	Gene Ontology	GO:0006413	2	255	0.195092957901	0.488592255977	RPL17; RPS27
sex differentiation	Gene Ontology	GO:0007548	2	258	0.198514589253	0.49377607463	SMAD5; AGT
positive regulation of cell projection organization	Gene Ontology	GO:0031346	2	259	0.199656737783	0.49380113323	VLDLR; FN1
lytic vacuole membrane	Gene Ontology	GO:0098852	2	259	0.199656737783	0.49380113323	LNPEP; AHNAK
lysosomal membrane	Gene Ontology	GO:0005765	2	259	0.199656737783	0.49380113323	LNPEP; AHNAK
kidney development	Gene Ontology	GO:0001822	2	261	0.201943343656	0.495555786687	SMAD5; AGT
positive regulation of neuron differentiation	Gene Ontology	GO:0045666	2	267	0.208820472578	0.500305124538	VLDLR; FN1
apical plasma membrane	Gene Ontology	GO:0016324	2	268	0.20996901871	0.500305124538	DSG2; FN1
nuclear membrane	Gene Ontology	GO:0031965	2	269	0.211118196862	0.500305124538	PCM12; TNPO1
early endosome	Gene Ontology	GO:0005769	2	269	0.211118196862	0.500305124538	SNX13; LNPEP
cellular protein complex disassembly	Gene Ontology	GO:0043624	2	271	0.213418387609	0.501605852589	RPL17; RPS27
cellular component assembly involved in morphogenesis	Gene Ontology	GO:0010927	2	274	0.216873031163	0.503332300493	UGT8; PCM12
regulation of lipid metabolic process	Gene Ontology	GO:0019216	2	275	0.218025680646	0.504293586835	AGT; ERBB4
steroid metabolic process	Gene Ontology	GO:0008202	2	275	0.218025680646	0.504293586835	VLDLR; AGT
negative regulation of cell development	Gene Ontology	GO:0010721	2	276	0.219178856061	0.504901202655	PCM12; ERBB4
renal system development	Gene Ontology	GO:0072001	2	277	0.220332542608	0.506329850851	SMAD5; AGT
lipid transport	Gene Ontology	GO:0006869	2	287	0.23189432735	0.509218366819	VLDLR; AGT
cell-substrate adhesion	Gene Ontology	GO:0031589	2	291	0.236529743652	0.511680672182	AGT; FN1
protein complex disassembly	Gene Ontology	GO:0043241	2	295	0.241169953828	0.515180928938	RPL17; RPS27
response to lipopolysaccharide	Gene Ontology	GO:0032496	2	297	0.243491589527	0.51566445733	VLDLR; ZCCHC11
ameboidal-type cell migration	Gene Ontology	GO:0001667	2	298	0.244652744069	0.51566445733	AGT; ERBB4
vacuolar membrane	Gene Ontology	GO:0005774	2	300	0.246975661786	0.518105030976	LNPEP; AHNAK
macromolecular complex disassembly	Gene Ontology	GO:0032984	2	306	0.253948367186	0.524384132894	RPL17; RPS27
positive regulation of cellular protein localization	Gene Ontology	GO:1903829	2	307	0.255110929475	0.524384132894	PCM12; ERBB4
receptor complex	Gene Ontology	GO:0043235	2	310	0.258599132599	0.525485127962	VLDLR; ERBB4
response to molecule of bacterial origin	Gene Ontology	GO:0002237	2	310	0.258599132599	0.525485127962	VLDLR; ZCCHC11
urogenital system development	Gene Ontology	GO:0001655	2	313	0.262087856877	0.528516285517	SMAD5; AGT
regulation of metal ion transport	Gene Ontology	GO:0010959	2	314	0.26325082521	0.529423084997	AGT; AHNAK
protein dephosphorylation	Gene Ontology	GO:0006470	2	316	0.26557678179	0.530516271294	PTPRZ1; LKAP
lipid localization	Gene Ontology	GO:0010876	2	319	0.269065592819	0.532508297863	VLDLR; AGT
transmembrane receptor protein serine/threonine kinase signaling pathway	Gene Ontology	GO:0007178	2	328	0.279528285683	0.540079311091	SMAD5; LNPEP
positive regulation of intracellular transport	Gene Ontology	GO:0032388	2	330	0.281852001	0.540079311091	PCM12; ERBB4
myeloid cell differentiation	Gene Ontology	GO:0030099	2	330	0.281852001	0.540079311091	SMAD5; PRTN3
positive regulation of neurogenesis	Gene Ontology	GO:0050769	2	339	0.292299241661	0.546751397898	VLDLR; FN1
epidermal growth factor receptor signaling pathway	Gene Ontology	GO:0007173	2	344	0.298094659174	0.552057021189	AGT; ERBB4
organonitrogen compound catabolic process	Gene Ontology	GO:1901565	2	345	0.299252856367	0.553682745102	LNPEP; HSPG2
establishment of protein localization to membrane	Gene Ontology	GO:0090150	2	346	0.300410735593	0.55382137773	RPL17; RPS27
calcium ion transport	Gene Ontology	GO:0006816	2	351	0.306195030943	0.558421603599	AGT; AHNAK
ERBB signaling pathway	Gene Ontology	GO:0038127	2	351	0.306195030943	0.558421603599	AGT; ERBB4
regulation of intracellular protein transport	Gene Ontology	GO:0033157	2	352	0.30735080448	0.558421603599	PCM12; ERBB4
regulation of neuron projection development	Gene Ontology	GO:0010975	2	353	0.308506194672	0.559434588448	VLDLR; FN1
ossification	Gene Ontology	GO:0001503	2	354	0.309661192427	0.55957856469	SMAD5; HSPG2
regulation of sequence-specific DNA binding transcription factor activity	Gene Ontology	GO:0051090	2	355	0.310815788714	0.560640166541	ZCCHC11; AGT
regulation of ion transmembrane transport	Gene Ontology	GO:0034765	2	355	0.310815788714	0.560640166541	AGT; AHNAK
positive regulation of cell migration	Gene Ontology	GO:0030335	2	357	0.31312374107	0.56143028454	AGT; FN1
sulfur compound metabolic process	Gene Ontology	GO:0006790	2	358	0.31427707938	0.56143028454	FAR2; HSPG2
ribonucleoprotein complex biogenesis	Gene Ontology	GO:0022613	2	364	0.321187629173	0.56691207276	DYNC1H1; RPS27
positive regulation of cell motility	Gene Ontology	GO:2000147	2	367	0.324636424907	0.568948141527	AGT; FN1
RNA splicing	Gene Ontology	GO:0008380	2	367	0.324636424907	0.568948141527	MBNL3; AHNAK
regulation of transmembrane transport	Gene Ontology	GO:0034762	2	368	0.325785007667	0.569725125124	AGT; AHNAK
cell-cell junction	Gene Ontology	GO:0005911	2	370	0.328080600147	0.57148537419	DSG2; AHNAK
positive regulation of cellular component movement	Gene Ontology	GO:0051272	2	374	0.332665266804	0.574159562742	AGT; FN1
cellular response to insulin stimulus	Gene Ontology	GO:0032869	2	375	0.333810029028	0.575117774352	VLDLR; ERBB4
endopeptidase activity	Gene Ontology	GO:0004175	2	377	0.336097813272	0.575974101028	USP34; PRTN3
regulation of peptidase activity	Gene Ontology	GO:0052547	2	380	0.339525023595	0.577237689715	AGT; FN1
positive regulation of cytokine production	Gene Ontology	GO:0001819	2	383	0.342946692739	0.580485154457	ZCCHC11; AGT
positive regulation of locomotion	Gene Ontology	GO:0040017	2	384	0.344085982936	0.581128043836	AGT; FN1
neurotrophin TRK receptor signaling pathway	Gene Ontology	GO:0048011	2	384	0.344085982936	0.581128043836	AGT; ERBB4
cellular response to lipid	Gene Ontology	GO:0071396	2	385	0.345224627786	0.581660059899	VLDLR; ZCCHC11
neurotrophin signaling pathway	Gene Ontology	GO:0038179	2	386	0.346362620016	0.582809240346	AGT; ERBB4
regulation of response to wounding	Gene Ontology	GO:1903034	2	390	0.350907919065	0.586658738865	PRKG1; AGT
endosomal part	Gene Ontology	GO:0044440	2	392	0.353176467557	0.587881648611	SNX13; LNPEP
negative regulation of hydrolase activity	Gene Ontology	GO:0051346	2	395	0.356574007598	0.590900672345	AGT; LKAP
divalent metal ion transport	Gene Ontology	GO:0070838	2	396	0.357705084925	0.592391128338	AGT; AHNAK
positive regulation of nervous system development	Gene Ontology	GO:0051962	2	397	0.358835433014	0.592727520812	VLDLR; FN1
nuclear envelope	Gene Ontology	GO:0005635	2	398	0.359965045201	0.593443340154	PCM12; TNPO1
divalent inorganic cation transport	Gene Ontology	GO:0072511	2	399	0.361093914872	0.593940822326	AGT; AHNAK
microtubule cytoskeleton organization	Gene Ontology	GO:0000226	2	405	0.367851175867	0.597231253366	PCM12; DYNC1H1
histone modification	Gene Ontology	GO:0016570	2	405	0.367851175867	0.597231253366	HCFC1; USP34
positive regulation of protein transport	Gene Ontology	GO:0051222	2	407	0.370097364134	0.597813619767	PCM12; ERBB4
ATPase activity	Gene Ontology	GO:0016887	2	407	0.370097364134	0.597813619767	DYNC1H1; SMARCA2
dephosphorylation	Gene Ontology	GO:0016311	2	407	0.370097364134	0.597813619767	PTPRZ1; LKAP
single-organism behavior	Gene Ontology	GO:0044708	2	410	0.373460632373	0.59977012656	VLDLR; PTPRZ1
covalent chromatin modification	Gene Ontology	GO:0016569	2	417	0.381279348024	0.606690528769	HCFC1; USP34
response to insulin	Gene Ontology	GO:0032868	2	418	0.382392917128	0.607315955961	VLDLR; ERBB4
viral life cycle	Gene Ontology	GO:0019058	2	418	0.382392917128	0.607315955961	RPL17; RPS27
posttranscriptional regulation of gene expression	Gene Ontology	GO:0010608	2	423	0.3879476786	0.611956948908	ZCCHC11; TNPO1
organelle localization	Gene Ontology	GO:0051640	2	427	0.392375456165	0.616361436701	PCM12; DYNC1H1
positive regulation of cell development	Gene Ontology	GO:0010720	2	430	0.395686711943	0.617273790335	VLDLR; FN1
pattern specification process	Gene Ontology	GO:0007389	2	433	0.398989602157	0.618687939792	SMAD5; ERBB4
enzyme activator activity	Gene Ontology	GO:0008047	2	433	0.398989602157	0.618687939792	AGT; FN1
protein oligomerization	Gene Ontology	GO:0051259	2	439	0.405569740975	0.624723992574	KCTD12; AHNAK
activation of protein kinase activity	Gene Ontology	GO:0032147	2	445	0.412114815792	0.627996176389	AGT; ERBB4
chromatin binding	Gene Ontology	GO:0003682	2	446	0.413202181277	0.628994175197	HCFC1; SMARCA2
leukocyte differentiation	Gene Ontology	GO:0002521	2	448	0.415373888122	0.630130823564	BMX; PRTN3
mitotic cell cycle phase transition	Gene Ontology	GO:0044772	2	449	0.416458220565	0.630130823564	PCM12; DYNC1H1
morphogenesis of an epithelium	Gene Ontology	GO:0002009	2	452	0.419705081268	0.631657382461	AGT; FREM2
Ras protein signal transduction	Gene Ontology	GO:0007265	2	454	0.421864498052	0.632302181429	PLEKHG3; ERBB4
cilium	Gene Ontology	GO:0005929	2	454	0.421864498052	0.632302181429	PCM12; TNPO1
protein localization to membrane	Gene Ontology	GO:0072657	2	460	0.428317624679	0.63779558645	RPL17; RPS27
protein secretion	Gene Ontology	GO:0009306	2	460	0.428317624679	0.63779558645	AGT; FN1
cellular response to peptide hormone stimulus	Gene Ontology	GO:0071375	2	463	0.431529854097	0.640035868286	VLDLR; ERBB4
regulation of cell projection organization	Gene Ontology	GO:0031344	2	465	0.433665958929	0.641344046837	VLDLR; FN1
centrosome	Gene Ontology	GO:0005813	2	470	0.438987163208	0.645851654961	PCM12; DYNC1H1
cell cycle phase transition	Gene Ontology	GO:0044770	2	472	0.441107943797	0.647110161956	PCM12; DYNC1H1
cellular response to peptide	Gene Ontology	GO:1901653	2	479	0.448495494794	0.651963035922	VLDLR; ERBB4
skeletal system development	Gene Ontology	GO:0001501	2	479	0.448495494794	0.651963035922	SMAD5; HSPG2
regulation of cellular protein localization	Gene Ontology	GO:1903827	2	489	0.458952386548	0.661522690194	PCM12; ERBB4
regulation of neuron differentiation	Gene Ontology	GO:0045664	2	491	0.461029861692	0.662407737064	VLDLR; FN1
positive regulation of GTPase activity	Gene Ontology	GO:0043547	2	496	0.466202974262	0.665326678738	SNX13; PLEKHG3
response to bacterium	Gene Ontology	GO:0009617	2	500	0.470320112171	0.66737432121	VLDLR; ZCCHC11
cytoplasmic vesicle part	Gene Ontology	GO:0044433	2	534	0.504525950588	0.686470329295	FN1; LNPEP
organelle fission	Gene Ontology	GO:0048285	2	541	0.511388137562	0.688698388777	LKAP; ERBB4
regulation of intracellular transport	Gene Ontology	GO:0032386	2	553	0.523005028685	0.695887094764	PCM12; ERBB4
monovalent inorganic cation transport	Gene Ontology	GO:0015672	2	555	0.524922993459	0.695887094764	KCNMB2; AGT
response to peptide hormone	Gene Ontology	GO:0043434	2	557	0.526835733264	0.696905830293	VLDLR; ERBB4
regulation of ion transport	Gene Ontology	GO:0043269	2	560	0.529695023652	0.699241185069	AGT; AHNAK
endocytosis	Gene Ontology	GO:0006897	2	568	0.53726196116	0.70522527448	VLDLR; PRTN3
monocarboxylic acid metabolic process	Gene Ontology	GO:0032787	2	569	0.538201892777	0.705372752348	UGT8; AGT
embryonic morphogenesis	Gene Ontology	GO:0048598	2	569	0.538201892777	0.705372752348	FN1; HSPG2
epithelial cell differentiation	Gene Ontology	GO:0030855	2	574	0.542881692117	0.708217582381	AGT; ERBB4
microtubule-based process	Gene Ontology	GO:0007017	2	574	0.542881692117	0.708217582381	PCM12; DYNC1H1
positive regulation of MAPK cascade	Gene Ontology	GO:0043410	2	581	0.549377634259	0.713437588014	AGT; ERBB4
tissue morphogenesis	Gene Ontology	GO:0048729	2	582	0.550300298635	0.714186768685	AGT; FREM2
response to peptide	Gene Ontology	GO:1901652	2	590	0.557633517002	0.719772288225	VLDLR; ERBB4
cation transmembrane transporter activity	Gene Ontology	GO:0008324	2	591	0.558544146617	0.720220566264	KCNMB2; SLC7A1i1
regulation of secretion by cell	Gene Ontology	GO:1903530	2	592	0.559453435666	0.720303340886	AGT; FN1
tube development	Gene Ontology	GO:0035295	2	592	0.559453435666	0.720303340886	SMAD5; AGT
regulation of cell adhesion	Gene Ontology	GO:0030155	2	596	0.563077174255	0.723511725914	PRKG1; FN1
perinuclear region of cytoplasm	Gene Ontology	GO:0048471	2	598	0.564880985103	0.725100742423	VLDLR; LNPEP
microtubule organizing center	Gene Ontology	GO:0005815	2	602	0.568472469235	0.726689057144	PCM12; DYNC1H1
translation	Gene Ontology	GO:0006412	2	607	0.572931528941	0.72884871617	RPL17; RPS27
cellular response to organonitrogen compound	Gene Ontology	GO:0071417	2	619	0.583495673559	0.737882511025	VLDLR; ERBB4
inflammatory response	Gene Ontology	GO:0006954	2	623	0.586973827181	0.739465968641	AGT; FN1
peptide biosynthetic process	Gene Ontology	GO:0043043	2	630	0.593008539441	0.743044812334	RPL17; RPS27
regulation of secretion	Gene Ontology	GO:0051046	2	648	0.608222103414	0.746939786884	AGT; FN1
synaptic transmission	Gene Ontology	GO:0007268	2	671	0.627025175812	0.755237986705	KCNMB2; AGT
regulation of cellular component biogenesis	Gene Ontology	GO:0044087	2	672	0.627826551809	0.755237986705	AGT; HCFC1
cellular response to hormone stimulus	Gene Ontology	GO:0032870	2	677	0.631813308026	0.756993256559	VLDLR; ERBB4
detection of stimulus	Gene Ontology	GO:0051606	2	680	0.634189281253	0.758588485852	KCNMB2; HSPG2
ribonucleoprotein complex	Gene Ontology	GO:1990904	2	682	0.635766572225	0.758588485852	RPL17; RPS27
intracellular ribonucleoprotein complex	Gene Ontology	GO:0030529	2	682	0.635766572225	0.758588485852	RPL17; RPS27
regulation of proteolysis	Gene Ontology	GO:0030162	2	686	0.638905116085	0.760204924072	AGT; FN1
transferase complex	Gene Ontology	GO:1990234	2	687	0.639686414285	0.760326826433	HCFC1; USP34
nucleoplasm part	Gene Ontology	GO:0044451	2	688	0.640466378617	0.760326826433	HCFC1; USP34
cell surface	Gene Ontology	GO:0009986	2	698	0.64819280364	0.764144305628	VLDLR; DSG2
nucleoside-triphosphatase activity	Gene Ontology	GO:0017111	2	714	0.660279530188	0.771439444805	DYNC1H1; SMARCA2
cellular response to cytokine stimulus	Gene Ontology	GO:0071345	2	723	0.666930318598	0.775441006228	VLDLR; ZCCHC11
endosome	Gene Ontology	GO:0005768	2	727	0.669852240169	0.777138011847	SNX13; LNPEP
nitrogen compound transport	Gene Ontology	GO:0071705	2	751	0.686948592932	0.786974709734	AGT; SLC7A1i1
pyrophosphatase activity	Gene Ontology	GO:0016462	2	756	0.690417259562	0.790240345881	DYNC1H1; SMARCA2
hydrolase activity, acting on acid anhydrides, in phosphorus-containing anhydrides	Gene Ontology	GO:0016818	2	758	0.691795818631	0.791463941046	DYNC1H1; SMARCA2
hydrolase activity, acting on acid anhydrides	Gene Ontology	GO:0016817	2	760	0.693169301302	0.792680636597	DYNC1H1; SMARCA2
protein catabolic process	Gene Ontology	GO:0030163	2	766	0.697259383562	0.79411599712	USP34; LNPEP
carbohydrate derivative biosynthetic process	Gene Ontology	GO:1901137	2	792	0.714462406959	0.804271561127	UGT8; HSPG2
ion transmembrane transporter activity	Gene Ontology	GO:0015075	2	794	0.71575106697	0.804575177541	KCNMB2; SLC7A1i1
nucleolus	Gene Ontology	GO:0005730	2	800	0.719587698264	0.806657494284	ZCCHC11; ZBED6
negative regulation of apoptotic process	Gene Ontology	GO:0043066	2	813	0.727750530991	0.811538642714	AGT; ERBB4
mitotic cell cycle process	Gene Ontology	GO:1903047	2	816	0.729605376394	0.812473068396	PCM12; DYNC1H1
negative regulation of catalytic activity	Gene Ontology	GO:0043086	2	817	0.730221266706	0.812522097026	AGT; LKAP
response to cytokine	Gene Ontology	GO:0034097	2	820	0.732061782685	0.813861729706	VLDLR; ZCCHC11
negative regulation of programmed cell death	Gene Ontology	GO:0043069	2	823	0.733891595661	0.814621492497	AGT; ERBB4
single-organism membrane organization	Gene Ontology	GO:0044802	2	848	0.748728960287	0.823795159834	RPL17; RPS27
regulation of anatomical structure morphogenesis	Gene Ontology	GO:0022603	2	861	0.756159190332	0.827696510993	AGT; FN1
substrate-specific transmembrane transporter activity	Gene Ontology	GO:0022891	2	864	0.757846631795	0.828479622701	KCNMB2; SLC7A1i1
response to other organism	Gene Ontology	GO:0051707	2	866	0.758965965461	0.828994435576	VLDLR; ZCCHC11
response to external biotic stimulus	Gene Ontology	GO:0043207	2	866	0.758965965461	0.828994435576	VLDLR; ZCCHC11
cell projection part	Gene Ontology	GO:0044463	2	875	0.763947605712	0.831500812614	PCM12; BMX
negative regulation of cell death	Gene Ontology	GO:0060548	2	876	0.764495559596	0.831500812614	AGT; ERBB4
protein complex binding	Gene Ontology	GO:0032403	2	886	0.769914479067	0.83559903352	FLNC; FN1
organ morphogenesis	Gene Ontology	GO:0009887	2	897	0.775749290496	0.839437552179	AGT; HSPG2
response to biotic stimulus	Gene Ontology	GO:0009607	2	900	0.777317952823	0.839684486796	VLDLR; ZCCHC11
enzyme regulator activity	Gene Ontology	GO:0030234	2	900	0.777317952823	0.839684486796	AGT; FN1
response to organonitrogen compound	Gene Ontology	GO:0010243	2	901	0.777838698628	0.839684486796	VLDLR; ERBB4
secretion by cell	Gene Ontology	GO:0032940	2	905	0.779911015097	0.840527948332	AGT; FN1
carbohydrate metabolic process	Gene Ontology	GO:0005975	2	907	0.780940795064	0.841139685332	UGT8; HSPG2
transmembrane transporter activity	Gene Ontology	GO:0022857	2	946	0.800190346493	0.854440560451	KCNMB2; SLC7A1i1
protein modification by small protein conjugation or removal	Gene Ontology	GO:0070647	2	949	0.801607035961	0.855471281699	USP34; LNPEP
regulation of immune response	Gene Ontology	GO:0050776	2	954	0.803948345729	0.857254345299	NCR3LG1; ERBB4
positive regulation of intracellular signal transduction	Gene Ontology	GO:1902533	2	957	0.805341297187	0.85838169942	AGT; ERBB4
carboxylic acid metabolic process	Gene Ontology	GO:0019752	2	962	0.807643295226	0.860074800822	UGT8; AGT
microtubule cytoskeleton	Gene Ontology	GO:0015630	2	1022	0.833426725054	0.875543194726	PCM12; DYNC1H1
negative regulation of signal transduction	Gene Ontology	GO:0009968	2	1036	0.838975160012	0.879565184153	SNX13; AGT
organelle envelope	Gene Ontology	GO:0031967	2	1051	0.844733459669	0.882061103827	PCM12; TNPO1
innate immune response	Gene Ontology	GO:0045087	2	1052	0.845110609691	0.882061103827	BMX; ERBB4
envelope	Gene Ontology	GO:0031975	2	1054	0.845862410654	0.882359625512	PCM12; TNPO1
cytoplasmic membrane-bounded vesicle	Gene Ontology	GO:0016023	2	1061	0.848467631298	0.883548064838	FN1; LNPEP
single-organism catabolic process	Gene Ontology	GO:0044712	2	1107	0.864611443438	0.892896389689	PRKG1; PRTN3
protein dimerization activity	Gene Ontology	GO:0046983	2	1117	0.867905328825	0.895460880675	ZBED6; ERBB4
negative regulation of signaling	Gene Ontology	GO:0023057	2	1147	0.877349453109	0.902406497024	SNX13; AGT
negative regulation of cell communication	Gene Ontology	GO:0010648	2	1159	0.880949407577	0.905380882304	SNX13; AGT
cytoplasmic vesicle	Gene Ontology	GO:0031410	2	1161	0.881539808744	0.905623660489	FN1; LNPEP
carbohydrate derivative metabolic process	Gene Ontology	GO:1901135	2	1264	0.908515810499	0.925896742704	UGT8; HSPG2
Golgi apparatus	Gene Ontology	GO:0005794	2	1363	0.928923006	0.941093026942	PRKG1; HSPG2
cytoskeletal part	Gene Ontology	GO:0044430	2	1378	0.931611385993	0.942671275815	PCM12; DYNC1H1
regulation of response to stress	Gene Ontology	GO:0080134	2	1383	0.932485907141	0.942985540216	PRKG1; AGT
regulation of apoptotic process	Gene Ontology	GO:0042981	2	1384	0.932659535082	0.942985540216	AGT; ERBB4
regulation of programmed cell death	Gene Ontology	GO:0043067	2	1395	0.934541715848	0.944515085938	AGT; ERBB4
regulation of immune system process	Gene Ontology	GO:0002682	2	1460	0.944683462719	0.952881899082	NCR3LG1; ERBB4
regulation of cell death	Gene Ontology	GO:0010941	2	1474	0.946662773551	0.953749689508	AGT; ERBB4
homeostatic process	Gene Ontology	GO:0042592	2	1488	0.948574417373	0.954923143789	SMAD5; AGT
mitochondrion	Gene Ontology	GO:0005739	2	1584	0.960024048834	0.963262571126	HCFC1; ERBB4
His-Purkinje system development	Gene Ontology	GO:0003164	1	5	0.0187875763649	0.376848857116	DSG2
ether lipid biosynthetic process	Gene Ontology	GO:0008611	1	5	0.0187875763649	0.376848857116	FAR2
galactosylceramide metabolic process	Gene Ontology	GO:0006681	1	5	0.0187875763649	0.376848857116	UGT8
cellular lipid biosynthetic process	Gene Ontology	GO:0097384	1	5	0.0187875763649	0.376848857116	FAR2
regulation of oligodendrocyte progenitor proliferation	Gene Ontology	GO:0070445	1	5	0.0187875763649	0.376848857116	PTPRZ1
glycerol ether biosynthetic process	Gene Ontology	GO:0046504	1	5	0.0187875763649	0.376848857116	FAR2
miRNA catabolic process	Gene Ontology	GO:0010587	1	5	0.0187875763649	0.376848857116	ZCCHC11
superoxide-generating NADPH oxidase activator activity	Gene Ontology	GO:0016176	1	5	0.0187875763649	0.376848857116	AGT
extracellular matrix constituent secretion	Gene Ontology	GO:0070278	1	5	0.0187875763649	0.376848857116	AGT
transforming growth factor beta receptor, pathway-specific cytoplasmic mediator activity	Gene Ontology	GO:0030618	1	5	0.0187875763649	0.376848857116	SMAD5
positive regulation of activation of JAK2 kinase activity	Gene Ontology	GO:0010535	1	5	0.0187875763649	0.376848857116	AGT
substrate-dependent cell migration, cell attachment to substrate	Gene Ontology	GO:0006931	1	5	0.0187875763649	0.376848857116	FN1
ether biosynthetic process	Gene Ontology	GO:1901503	1	5	0.0187875763649	0.376848857116	FAR2
oligodendrocyte progenitor proliferation	Gene Ontology	GO:0070444	1	5	0.0187875763649	0.376848857116	PTPRZ1
bundle of His cell-Purkinje myocyte adhesion involved in cell communication	Gene Ontology	GO:0086073	1	6	0.0218843472085	0.376848857116	DSG2
galactolipid metabolic process	Gene Ontology	GO:0019374	1	6	0.0218843472085	0.376848857116	UGT8
mineralocorticoid secretion	Gene Ontology	GO:0035931	1	6	0.0218843472085	0.376848857116	AGT
regulation of neurotrophin TRK receptor signaling pathway	Gene Ontology	GO:0051386	1	6	0.0218843472085	0.376848857116	AGT
very-low-density lipoprotein particle clearance	Gene Ontology	GO:0034447	1	6	0.0218843472085	0.376848857116	VLDLR
paranodal junction assembly	Gene Ontology	GO:0030913	1	6	0.0218843472085	0.376848857116	UGT8
renal response to blood flow involved in circulatory renin-angiotensin regulation of systemic arterial blood pressure	Gene Ontology	GO:0001999	1	6	0.0218843472085	0.376848857116	AGT
microtubule anchoring at microtubule organizing center	Gene Ontology	GO:0072393	1	6	0.0218843472085	0.376848857116	PCM12
cell adhesive protein binding involved in bundle of His cell-Purkinje myocyte communication	Gene Ontology	GO:0086083	1	6	0.0218843472085	0.376848857116	DSG2
aldosterone secretion	Gene Ontology	GO:0035932	1	6	0.0218843472085	0.376848857116	AGT
cardiac muscle cell-cardiac muscle cell adhesion	Gene Ontology	GO:0086042	1	6	0.0218843472085	0.376848857116	DSG2
positive regulation of activation of Janus kinase activity	Gene Ontology	GO:0010536	1	6	0.0218843472085	0.376848857116	AGT
SMAD protein complex	Gene Ontology	GO:0071141	1	7	0.0249713460318	0.376848857116	SMAD5
uridylyltransferase activity	Gene Ontology	GO:0070569	1	7	0.0249713460318	0.376848857116	ZCCHC11
regulation of NAD(P)H oxidase activity	Gene Ontology	GO:0033860	1	7	0.0249713460318	0.376848857116	AGT
regulation of ventricular cardiac muscle cell action potential	Gene Ontology	GO:0098911	1	7	0.0249713460318	0.376848857116	DSG2
arginine transport	Gene Ontology	GO:0015809	1	7	0.0249713460318	0.376848857116	SLC7A1i1
drinking behavior	Gene Ontology	GO:0042756	1	7	0.0249713460318	0.376848857116	AGT
interkinetic nuclear migration	Gene Ontology	GO:0022027	1	7	0.0249713460318	0.376848857116	PCM12
artery smooth muscle contraction	Gene Ontology	GO:0014824	1	7	0.0249713460318	0.376848857116	AGT
structural molecule activity conferring elasticity	Gene Ontology	GO:0097493	1	7	0.0249713460318	0.376848857116	AHNAK
stress granule assembly	Gene Ontology	GO:0034063	1	7	0.0249713460318	0.376848857116	DYNC1H1
regulation of activation of JAK2 kinase activity	Gene Ontology	GO:0010534	1	7	0.0249713460318	0.376848857116	AGT
positive regulation of cholesterol esterification	Gene Ontology	GO:0010873	1	7	0.0249713460318	0.376848857116	AGT
ether lipid metabolic process	Gene Ontology	GO:0046485	1	7	0.0249713460318	0.376848857116	FAR2
intraciliary transport involved in cilium morphogenesis	Gene Ontology	GO:0035735	1	7	0.0249713460318	0.376848857116	PCM12
antigen processing and presentation of exogenous peptide antigen via MHC class I, TAP-independent	Gene Ontology	GO:0002480	1	8	0.0280486036657	0.376848857116	LNPEP
relaxation of vascular smooth muscle	Gene Ontology	GO:0060087	1	8	0.0280486036657	0.376848857116	PRKG1
virion	Gene Ontology	GO:0019012	1	8	0.0280486036657	0.376848857116	NCR3LG1
NK T cell differentiation	Gene Ontology	GO:0001865	1	8	0.0280486036657	0.376848857116	BMX
positive regulation of protein localization to cell surface	Gene Ontology	GO:2000010	1	8	0.0280486036657	0.376848857116	ERBB4
ribosomal protein import into nucleus	Gene Ontology	GO:0006610	1	8	0.0280486036657	0.376848857116	TNPO1
negative regulation of platelet aggregation	Gene Ontology	GO:0090331	1	8	0.0280486036657	0.376848857116	PRKG1
protein import into nucleus, docking	Gene Ontology	GO:0000059	1	8	0.0280486036657	0.376848857116	TNPO1
MLL5-L complex	Gene Ontology	GO:0070688	1	8	0.0280486036657	0.376848857116	HCFC1
virion part	Gene Ontology	GO:0044423	1	8	0.0280486036657	0.376848857116	NCR3LG1
positive regulation of superoxide anion generation	Gene Ontology	GO:0032930	1	8	0.0280486036657	0.376848857116	AGT
regulation of activation of Janus kinase activity	Gene Ontology	GO:0010533	1	8	0.0280486036657	0.376848857116	AGT
negative regulation of phagocytosis	Gene Ontology	GO:0050765	1	8	0.0280486036657	0.376848857116	PRTN3
STAT protein import into nucleus	Gene Ontology	GO:0007262	1	8	0.0280486036657	0.376848857116	ERBB4
tonic smooth muscle contraction	Gene Ontology	GO:0014820	1	8	0.0280486036657	0.376848857116	AGT
fibrinogen complex	Gene Ontology	GO:0005577	1	9	0.031116150844	0.376848857116	FN1
peristalsis	Gene Ontology	GO:0030432	1	9	0.031116150844	0.376848857116	AGT
type 1 angiotensin receptor binding	Gene Ontology	GO:0031702	1	9	0.031116150844	0.376848857116	AGT
desmosome organization	Gene Ontology	GO:0002934	1	9	0.031116150844	0.376848857116	DSG2
SAGA complex	Gene Ontology	GO:0000124	1	9	0.031116150844	0.376848857116	USP34
basic amino acid transmembrane transporter activity	Gene Ontology	GO:0015174	1	9	0.031116150844	0.376848857116	SLC7A1i1
regulation of cholesterol esterification	Gene Ontology	GO:0010872	1	9	0.031116150844	0.376848857116	AGT
receptor signaling protein tyrosine kinase activity	Gene Ontology	GO:0004716	1	9	0.031116150844	0.376848857116	ERBB4
histone acetyltransferase activity (H4-K5 specific)	Gene Ontology	GO:0043995	1	9	0.031116150844	0.376848857116	HCFC1
histone acetyltransferase activity (H4-K8 specific)	Gene Ontology	GO:0043996	1	9	0.031116150844	0.376848857116	HCFC1
histone acetyltransferase activity (H4-K16 specific)	Gene Ontology	GO:0046972	1	9	0.031116150844	0.376848857116	HCFC1
cyclic nucleotide-dependent protein kinase activity	Gene Ontology	GO:0004690	1	9	0.031116150844	0.376848857116	PRKG1
protein binding involved in heterotypic cell-cell adhesion	Gene Ontology	GO:0086080	1	9	0.031116150844	0.376848857116	DSG2
negative regulation of neuron migration	Gene Ontology	GO:2001223	1	9	0.031116150844	0.376848857116	ERBB4
mitochondrial fragmentation involved in apoptotic process	Gene Ontology	GO:0043653	1	9	0.031116150844	0.376848857116	ERBB4
ovulation from ovarian follicle	Gene Ontology	GO:0001542	1	10	0.0341740182038	0.376848857116	AGT
low-density lipoprotein receptor activity	Gene Ontology	GO:0005041	1	10	0.0341740182038	0.376848857116	VLDLR
regulation of blood volume by renin-angiotensin	Gene Ontology	GO:0002016	1	10	0.0341740182038	0.376848857116	AGT
relaxation of smooth muscle	Gene Ontology	GO:0044557	1	10	0.0341740182038	0.376848857116	PRKG1
activation of JAK2 kinase activity	Gene Ontology	GO:0042977	1	10	0.0341740182038	0.376848857116	AGT
negative regulation of sodium ion transmembrane transporter activity	Gene Ontology	GO:2000650	1	10	0.0341740182038	0.376848857116	AGT
transforming growth factor beta receptor, cytoplasmic mediator activity	Gene Ontology	GO:0005072	1	10	0.0341740182038	0.376848857116	SMAD5
uterine smooth muscle contraction	Gene Ontology	GO:0070471	1	11	0.0372222362851	0.376848857116	AGT
low-density lipoprotein particle remodeling	Gene Ontology	GO:0034374	1	11	0.0372222362851	0.376848857116	AGT
angiotensin receptor binding	Gene Ontology	GO:0031701	1	11	0.0372222362851	0.376848857116	AGT
negative regulation of sodium ion transmembrane transport	Gene Ontology	GO:1902306	1	11	0.0372222362851	0.376848857116	AGT
gap junction assembly	Gene Ontology	GO:0016264	1	11	0.0372222362851	0.376848857116	AGT
viral latency	Gene Ontology	GO:0019042	1	11	0.0372222362851	0.376848857116	HCFC1
regulation of extracellular matrix assembly	Gene Ontology	GO:1901201	1	11	0.0372222362851	0.376848857116	AGT
protein binding involved in cell-cell adhesion	Gene Ontology	GO:0098632	1	11	0.0372222362851	0.376848857116	DSG2
interleukin-6-mediated signaling pathway	Gene Ontology	GO:0070102	1	11	0.0372222362851	0.376848857116	ZCCHC11
cGMP-mediated signaling	Gene Ontology	GO:0019934	1	11	0.0372222362851	0.376848857116	PRKG1
regulation of cardiac muscle cell action potential involved in regulation of contraction	Gene Ontology	GO:0098909	1	11	0.0372222362851	0.376848857116	DSG2
Set1C/COMPASS complex	Gene Ontology	GO:0048188	1	11	0.0372222362851	0.376848857116	HCFC1
bundle of His cell to Purkinje myocyte communication	Gene Ontology	GO:0086069	1	11	0.0372222362851	0.376848857116	DSG2
sterol esterification	Gene Ontology	GO:0034434	1	12	0.0402608355319	0.376848857116	AGT
negative regulation of sodium ion transport	Gene Ontology	GO:0010766	1	12	0.0402608355319	0.376848857116	AGT
physiological cardiac muscle hypertrophy	Gene Ontology	GO:0003301	1	12	0.0402608355319	0.376848857116	AGT
steroid esterification	Gene Ontology	GO:0034433	1	12	0.0402608355319	0.376848857116	AGT
glycerol ether metabolic process	Gene Ontology	GO:0006662	1	12	0.0402608355319	0.376848857116	FAR2
angiotensin maturation	Gene Ontology	GO:0002003	1	12	0.0402608355319	0.376848857116	AGT
regulation of transmission of nerve impulse	Gene Ontology	GO:0051969	1	12	0.0402608355319	0.376848857116	AGT
cholesterol esterification	Gene Ontology	GO:0034435	1	12	0.0402608355319	0.376848857116	AGT
physiological muscle hypertrophy	Gene Ontology	GO:0003298	1	12	0.0402608355319	0.376848857116	AGT
response to stimulus involved in regulation of muscle adaptation	Gene Ontology	GO:0014874	1	12	0.0402608355319	0.376848857116	AGT
basic amino acid transport	Gene Ontology	GO:0015802	1	12	0.0402608355319	0.376848857116	SLC7A1i1
positive regulation of renal sodium excretion	Gene Ontology	GO:0035815	1	12	0.0402608355319	0.376848857116	AGT
protein localization to centrosome	Gene Ontology	GO:0071539	1	12	0.0402608355319	0.376848857116	PCM12
cell growth involved in cardiac muscle cell development	Gene Ontology	GO:0061049	1	12	0.0402608355319	0.376848857116	AGT
npBAF complex	Gene Ontology	GO:0071564	1	12	0.0402608355319	0.376848857116	SMARCA2
regulation of superoxide anion generation	Gene Ontology	GO:0032928	1	12	0.0402608355319	0.376848857116	AGT
membrane hyperpolarization	Gene Ontology	GO:0060081	1	13	0.0432898462921	0.376848857116	AGT
olfactory bulb interneuron differentiation	Gene Ontology	GO:0021889	1	13	0.0432898462921	0.376848857116	ERBB4
ether metabolic process	Gene Ontology	GO:0018904	1	13	0.0432898462921	0.376848857116	FAR2
activation of Janus kinase activity	Gene Ontology	GO:0042976	1	13	0.0432898462921	0.376848857116	AGT
detection of calcium ion	Gene Ontology	GO:0005513	1	13	0.0432898462921	0.376848857116	KCNMB2
regulation of angiotensin levels in blood	Gene Ontology	GO:0002002	1	13	0.0432898462921	0.376848857116	AGT
positive regulation of systemic arterial blood pressure	Gene Ontology	GO:0003084	1	13	0.0432898462921	0.376848857116	AGT
S100 protein binding	Gene Ontology	GO:0044548	1	13	0.0432898462921	0.376848857116	AHNAK
anatomical structure regression	Gene Ontology	GO:0060033	1	13	0.0432898462921	0.376848857116	SMAD5
pre-miRNA processing	Gene Ontology	GO:0031054	1	14	0.0463092988179	0.376848857116	ZCCHC11
mammary gland epithelial cell differentiation	Gene Ontology	GO:0060644	1	14	0.0463092988179	0.376848857116	ERBB4
apolipoprotein binding	Gene Ontology	GO:0034185	1	14	0.0463092988179	0.376848857116	VLDLR
cardiac conduction system development	Gene Ontology	GO:0003161	1	14	0.0463092988179	0.376848857116	DSG2
metalloaminopeptidase activity	Gene Ontology	GO:0070006	1	14	0.0463092988179	0.376848857116	LNPEP
positive regulation of fatty acid biosynthetic process	Gene Ontology	GO:0045723	1	14	0.0463092988179	0.376848857116	AGT
glycosylceramide metabolic process	Gene Ontology	GO:0006677	1	14	0.0463092988179	0.376848857116	UGT8
transmembrane receptor protein phosphatase activity	Gene Ontology	GO:0019198	1	14	0.0463092988179	0.376848857116	PTPRZ1
nBAF complex	Gene Ontology	GO:0071565	1	14	0.0463092988179	0.376848857116	SMARCA2
lipoprotein particle receptor activity	Gene Ontology	GO:0030228	1	14	0.0463092988179	0.376848857116	VLDLR
regulation of angiotensin metabolic process	Gene Ontology	GO:0060177	1	14	0.0463092988179	0.376848857116	AGT
H4 histone acetyltransferase activity	Gene Ontology	GO:0010485	1	14	0.0463092988179	0.376848857116	HCFC1
transmembrane receptor protein tyrosine phosphatase activity	Gene Ontology	GO:0005001	1	14	0.0463092988179	0.376848857116	PTPRZ1
astrocyte development	Gene Ontology	GO:0014002	1	15	0.0493192232658	0.376848857116	AGT
histone H4-K5 acetylation	Gene Ontology	GO:0043981	1	15	0.0493192232658	0.376848857116	HCFC1
vascular smooth muscle cell differentiation	Gene Ontology	GO:0035886	1	15	0.0493192232658	0.376848857116	SMARCA2
positive regulation of extracellular matrix organization	Gene Ontology	GO:1903055	1	15	0.0493192232658	0.376848857116	AGT
cGMP binding	Gene Ontology	GO:0030553	1	15	0.0493192232658	0.376848857116	PRKG1
SWI/SNF complex	Gene Ontology	GO:0016514	1	15	0.0493192232658	0.376848857116	SMARCA2
regulation of platelet aggregation	Gene Ontology	GO:0090330	1	15	0.0493192232658	0.376848857116	PRKG1
positive regulation of macrophage derived foam cell differentiation	Gene Ontology	GO:0010744	1	15	0.0493192232658	0.376848857116	AGT
neurological system process involved in regulation of systemic arterial blood pressure	Gene Ontology	GO:0001976	1	15	0.0493192232658	0.376848857116	AGT
histone H4-K8 acetylation	Gene Ontology	GO:0043982	1	15	0.0493192232658	0.376848857116	HCFC1
regulation of cardiac muscle cell action potential	Gene Ontology	GO:0098901	1	16	0.0523196496974	0.376848857116	DSG2
corticosteroid hormone secretion	Gene Ontology	GO:0035930	1	16	0.0523196496974	0.376848857116	AGT
pericentriolar material	Gene Ontology	GO:0000242	1	16	0.0523196496974	0.376848857116	PCM12
regulation of cardiac conduction	Gene Ontology	GO:1903779	1	16	0.0523196496974	0.376848857116	AGT
ribosomal small subunit assembly	Gene Ontology	GO:0000028	1	16	0.0523196496974	0.376848857116	RPS27
negative regulation of platelet activation	Gene Ontology	GO:0010544	1	16	0.0523196496974	0.376848857116	PRKG1
Ada2/Gcn5/Ada3 transcription activator complex	Gene Ontology	GO:0005671	1	16	0.0523196496974	0.376848857116	HCFC1
phasic smooth muscle contraction	Gene Ontology	GO:0014821	1	16	0.0523196496974	0.376848857116	AGT
miRNA metabolic process	Gene Ontology	GO:0010586	1	16	0.0523196496974	0.376848857116	ZCCHC11
integrin activation	Gene Ontology	GO:0033622	1	16	0.0523196496974	0.376848857116	FN1
response to muscle activity	Gene Ontology	GO:0014850	1	16	0.0523196496974	0.376848857116	AGT
cytoplasmic mRNA processing body assembly	Gene Ontology	GO:0033962	1	17	0.0553106080796	0.382241148269	DYNC1H1
myelin assembly	Gene Ontology	GO:0032288	1	17	0.0553106080796	0.382241148269	UGT8
negative regulation of smooth muscle contraction	Gene Ontology	GO:0045986	1	17	0.0553106080796	0.382241148269	PRKG1
protein binding involved in cell adhesion	Gene Ontology	GO:0098631	1	17	0.0553106080796	0.382241148269	DSG2
negative regulation of tissue remodeling	Gene Ontology	GO:0034104	1	17	0.0553106080796	0.382241148269	AGT
calcium-activated potassium channel activity	Gene Ontology	GO:0015269	1	17	0.0553106080796	0.382241148269	KCNMB2
nuclear localization sequence binding	Gene Ontology	GO:0008139	1	18	0.0582921282845	0.384104227651	TNPO1
positive regulation of cardiac muscle hypertrophy	Gene Ontology	GO:0010613	1	18	0.0582921282845	0.384104227651	AGT
positive regulation of cardiac muscle cell proliferation	Gene Ontology	GO:0060045	1	18	0.0582921282845	0.384104227651	ERBB4
regulation of norepinephrine secretion	Gene Ontology	GO:0014061	1	18	0.0582921282845	0.384104227651	AGT
positive regulation of muscle hypertrophy	Gene Ontology	GO:0014742	1	18	0.0582921282845	0.384104227651	AGT
positive regulation of tyrosine phosphorylation of Stat5 protein	Gene Ontology	GO:0042523	1	18	0.0582921282845	0.384104227651	ERBB4
ankyrin binding	Gene Ontology	GO:0030506	1	19	0.0612642400901	0.384104227651	FLNC
vascular smooth muscle contraction	Gene Ontology	GO:0014829	1	19	0.0612642400901	0.384104227651	AGT
activation of NF-kappaB-inducing kinase activity	Gene Ontology	GO:0007250	1	19	0.0612642400901	0.384104227651	AGT
histone H4-K16 acetylation	Gene Ontology	GO:0043984	1	19	0.0612642400901	0.384104227651	HCFC1
regulation of systemic arterial blood pressure by circulatory renin-angiotensin	Gene Ontology	GO:0001991	1	19	0.0612642400901	0.384104227651	AGT
norepinephrine secretion	Gene Ontology	GO:0048243	1	19	0.0612642400901	0.384104227651	AGT
mammary gland alveolus development	Gene Ontology	GO:0060749	1	19	0.0612642400901	0.384104227651	ERBB4
mammary gland lobule development	Gene Ontology	GO:0061377	1	19	0.0612642400901	0.384104227651	ERBB4
very-low-density lipoprotein particle	Gene Ontology	GO:0034361	1	19	0.0612642400901	0.384104227651	VLDLR
positive regulation of branching involved in ureteric bud morphogenesis	Gene Ontology	GO:0090190	1	19	0.0612642400901	0.384104227651	AGT
triglyceride-rich lipoprotein particle	Gene Ontology	GO:0034385	1	19	0.0612642400901	0.384104227651	VLDLR
positive regulation of cardiac muscle tissue growth	Gene Ontology	GO:0055023	1	20	0.0642269731804	0.384104227651	ERBB4
neuronal stem cell population maintenance	Gene Ontology	GO:0097150	1	20	0.0642269731804	0.384104227651	PCM12
cellular sodium ion homeostasis	Gene Ontology	GO:0006883	1	20	0.0642269731804	0.384104227651	AGT
regulation of tyrosine phosphorylation of Stat5 protein	Gene Ontology	GO:0042522	1	20	0.0642269731804	0.384104227651	ERBB4
histone deubiquitination	Gene Ontology	GO:0016578	1	20	0.0642269731804	0.384104227651	USP34
flavonoid biosynthetic process	Gene Ontology	GO:0009813	1	20	0.0642269731804	0.384104227651	UGT8
UDP-galactosyltransferase activity	Gene Ontology	GO:0035250	1	20	0.0642269731804	0.384104227651	UGT8
renal sodium excretion	Gene Ontology	GO:0035812	1	21	0.0671803571459	0.384104227651	AGT
regulation of protein localization to cell surface	Gene Ontology	GO:2000008	1	21	0.0671803571459	0.384104227651	ERBB4
response to salt stress	Gene Ontology	GO:0009651	1	21	0.0671803571459	0.384104227651	AGT
protein K48-linked deubiquitination	Gene Ontology	GO:0071108	1	21	0.0671803571459	0.384104227651	USP34
regulation of renal sodium excretion	Gene Ontology	GO:0035813	1	21	0.0671803571459	0.384104227651	AGT
centriolar satellite	Gene Ontology	GO:0034451	1	21	0.0671803571459	0.384104227651	PCM12
regulation of lipopolysaccharide-mediated signaling pathway	Gene Ontology	GO:0031664	1	21	0.0671803571459	0.384104227651	ZCCHC11
flavonoid glucuronidation	Gene Ontology	GO:0052696	1	22	0.0701244214835	0.384104227651	UGT8
positive regulation of steroid metabolic process	Gene Ontology	GO:0045940	1	22	0.0701244214835	0.384104227651	AGT
protein localization to microtubule cytoskeleton	Gene Ontology	GO:0072698	1	22	0.0701244214835	0.384104227651	PCM12
norepinephrine transport	Gene Ontology	GO:0015874	1	22	0.0701244214835	0.384104227651	AGT
positive regulation of mesonephros development	Gene Ontology	GO:0061213	1	22	0.0701244214835	0.384104227651	AGT
steroid hormone secretion	Gene Ontology	GO:0035929	1	22	0.0701244214835	0.384104227651	AGT
ventricular cardiac muscle cell action potential	Gene Ontology	GO:0086005	1	22	0.0701244214835	0.384104227651	DSG2
production of miRNAs involved in gene silencing by miRNA	Gene Ontology	GO:0035196	1	22	0.0701244214835	0.384104227651	ZCCHC11
NLS-bearing protein import into nucleus	Gene Ontology	GO:0006607	1	22	0.0701244214835	0.384104227651	TNPO1
ovulation	Gene Ontology	GO:0030728	1	22	0.0701244214835	0.384104227651	AGT
ncRNA catabolic process	Gene Ontology	GO:0034661	1	22	0.0701244214835	0.384104227651	ZCCHC11
regulation of superoxide metabolic process	Gene Ontology	GO:0090322	1	22	0.0701244214835	0.384104227651	AGT
nitric oxide mediated signal transduction	Gene Ontology	GO:0007263	1	23	0.0730591955973	0.384104227651	AGT
nucleus localization	Gene Ontology	GO:0051647	1	23	0.0730591955973	0.384104227651	PCM12
dynein binding	Gene Ontology	GO:0045502	1	23	0.0730591955973	0.384104227651	DYNC1H1
dsRNA fragmentation	Gene Ontology	GO:0031050	1	23	0.0730591955973	0.384104227651	ZCCHC11
macromolecular complex remodeling	Gene Ontology	GO:0034367	1	23	0.0730591955973	0.384104227651	AGT
negative regulation of muscle contraction	Gene Ontology	GO:0045932	1	23	0.0730591955973	0.384104227651	PRKG1
protein-lipid complex remodeling	Gene Ontology	GO:0034368	1	23	0.0730591955973	0.384104227651	AGT
lipoprotein particle binding	Gene Ontology	GO:0071813	1	23	0.0730591955973	0.384104227651	VLDLR
regulation of branching involved in ureteric bud morphogenesis	Gene Ontology	GO:0090189	1	23	0.0730591955973	0.384104227651	AGT
protein-lipid complex binding	Gene Ontology	GO:0071814	1	23	0.0730591955973	0.384104227651	VLDLR
female meiotic division	Gene Ontology	GO:0007143	1	23	0.0730591955973	0.384104227651	LKAP
plasma lipoprotein particle remodeling	Gene Ontology	GO:0034369	1	23	0.0730591955973	0.384104227651	AGT
positive regulation of cell junction assembly	Gene Ontology	GO:1901890	1	23	0.0730591955973	0.384104227651	AGT
cartilage development involved in endochondral bone morphogenesis	Gene Ontology	GO:0060351	1	23	0.0730591955973	0.384104227651	HSPG2
desmosome	Gene Ontology	GO:0030057	1	23	0.0730591955973	0.384104227651	DSG2
production of small RNA involved in gene silencing by RNA	Gene Ontology	GO:0070918	1	23	0.0730591955973	0.384104227651	ZCCHC11
renal system process involved in regulation of systemic arterial blood pressure	Gene Ontology	GO:0003071	1	24	0.0759847087985	0.385264978625	AGT
endosome lumen	Gene Ontology	GO:0031904	1	24	0.0759847087985	0.385264978625	LNPEP
regulation of voltage-gated calcium channel activity	Gene Ontology	GO:1901385	1	24	0.0759847087985	0.385264978625	AHNAK
positive regulation of transcription from RNA polymerase II promoter involved in cellular response to chemical stimulus	Gene Ontology	GO:1901522	1	24	0.0759847087985	0.385264978625	SMAD5
peptide catabolic process	Gene Ontology	GO:0043171	1	24	0.0759847087985	0.385264978625	LNPEP
positive regulation of epidermal growth factor receptor signaling pathway	Gene Ontology	GO:0045742	1	24	0.0759847087985	0.385264978625	AGT
positive regulation of cardiac muscle tissue development	Gene Ontology	GO:0055025	1	24	0.0759847087985	0.385264978625	ERBB4
superoxide anion generation	Gene Ontology	GO:0042554	1	24	0.0759847087985	0.385264978625	AGT
BAF-type complex	Gene Ontology	GO:0090544	1	24	0.0759847087985	0.385264978625	SMARCA2
tyrosine phosphorylation of Stat5 protein	Gene Ontology	GO:0042506	1	24	0.0759847087985	0.385264978625	ERBB4
positive regulation of heart growth	Gene Ontology	GO:0060421	1	24	0.0759847087985	0.385264978625	ERBB4
positive regulation of ERBB signaling pathway	Gene Ontology	GO:1901186	1	25	0.0789009903059	0.388274166398	AGT
protein localization to cytoskeleton	Gene Ontology	GO:0044380	1	25	0.0789009903059	0.388274166398	PCM12
regulation of heart rate by cardiac conduction	Gene Ontology	GO:0086091	1	25	0.0789009903059	0.388274166398	DSG2
extracellular matrix assembly	Gene Ontology	GO:0085029	1	25	0.0789009903059	0.388274166398	AGT
cellular response to interleukin-6	Gene Ontology	GO:0071354	1	25	0.0789009903059	0.388274166398	ZCCHC11
glycosphingolipid biosynthetic process	Gene Ontology	GO:0006688	1	25	0.0789009903059	0.388274166398	UGT8
regulation of systemic arterial blood pressure by renin-angiotensin	Gene Ontology	GO:0003081	1	26	0.0818080692462	0.388274166398	AGT
endochondral ossification	Gene Ontology	GO:0001958	1	26	0.0818080692462	0.388274166398	HSPG2
regulation of long-term neuronal synaptic plasticity	Gene Ontology	GO:0048169	1	26	0.0818080692462	0.388274166398	AGT
regulation of excretion	Gene Ontology	GO:0044062	1	26	0.0818080692462	0.388274166398	AGT
phosphatidylinositol-3-phosphate binding	Gene Ontology	GO:0032266	1	26	0.0818080692462	0.388274166398	SNX13
replacement ossification	Gene Ontology	GO:0036075	1	26	0.0818080692462	0.388274166398	HSPG2
carbohydrate derivative transporter activity	Gene Ontology	GO:1901505	1	26	0.0818080692462	0.388274166398	VLDLR
negative regulation of myoblast differentiation	Gene Ontology	GO:0045662	1	26	0.0818080692462	0.388274166398	MBNL3
regulation of mesonephros development	Gene Ontology	GO:0061217	1	26	0.0818080692462	0.388274166398	AGT
positive regulation of vasodilation	Gene Ontology	GO:0045909	1	26	0.0818080692462	0.388274166398	AGT
transcriptional activator activity, RNA polymerase II distal enhancer sequence-specific binding	Gene Ontology	GO:0001205	1	26	0.0818080692462	0.388274166398	HCFC1
nonmotile primary cilium assembly	Gene Ontology	GO:0035058	1	26	0.0818080692462	0.388274166398	PCM12
cytoplasmic dynein complex	Gene Ontology	GO:0005868	1	27	0.084705974654	0.390962413701	DYNC1H1
calcium activated cation channel activity	Gene Ontology	GO:0005227	1	27	0.084705974654	0.390962413701	KCNMB2
MLL1 complex	Gene Ontology	GO:0071339	1	27	0.084705974654	0.390962413701	HCFC1
MLL1/2 complex	Gene Ontology	GO:0044665	1	27	0.084705974654	0.390962413701	HCFC1
relaxation of muscle	Gene Ontology	GO:0090075	1	27	0.084705974654	0.390962413701	PRKG1
regulation of neuron migration	Gene Ontology	GO:2001222	1	27	0.084705974654	0.390962413701	ERBB4
catenin import into nucleus	Gene Ontology	GO:0035411	1	27	0.084705974654	0.390962413701	AGT
regulation of cardiac muscle cell proliferation	Gene Ontology	GO:0060043	1	27	0.084705974654	0.390962413701	ERBB4
cellular glucuronidation	Gene Ontology	GO:0052695	1	27	0.084705974654	0.390962413701	UGT8
positive regulation of NIK/NF-kappaB signaling	Gene Ontology	GO:1901224	1	28	0.0875947354726	0.392703442468	AGT
epidermal growth factor receptor binding	Gene Ontology	GO:0005154	1	28	0.0875947354726	0.392703442468	ERBB4
regulation of macrophage derived foam cell differentiation	Gene Ontology	GO:0010743	1	28	0.0875947354726	0.392703442468	AGT
cellular response to glucose starvation	Gene Ontology	GO:0042149	1	28	0.0875947354726	0.392703442468	VLDLR
L-alpha-amino acid transmembrane transport	Gene Ontology	GO:1902475	1	28	0.0875947354726	0.392703442468	SLC7A1i1
cell proliferation in forebrain	Gene Ontology	GO:0021846	1	28	0.0875947354726	0.392703442468	PCM12
mitochondrial fission	Gene Ontology	GO:0000266	1	28	0.0875947354726	0.392703442468	ERBB4
positive regulation of phosphatidylinositol 3-kinase activity	Gene Ontology	GO:0043552	1	29	0.0904743805536	0.39749654824	ERBB4
intraciliary transport	Gene Ontology	GO:0042073	1	29	0.0904743805536	0.39749654824	PCM12
regulation of extracellular matrix organization	Gene Ontology	GO:1903053	1	29	0.0904743805536	0.39749654824	AGT
Ran GTPase binding	Gene Ontology	GO:0008536	1	29	0.0904743805536	0.39749654824	TNPO1
substrate-dependent cell migration	Gene Ontology	GO:0006929	1	30	0.093344938658	0.402062161328	FN1
cardiac muscle cell action potential involved in contraction	Gene Ontology	GO:0086002	1	30	0.093344938658	0.402062161328	DSG2
positive regulation of fatty acid metabolic process	Gene Ontology	GO:0045923	1	30	0.093344938658	0.402062161328	AGT
flavonoid metabolic process	Gene Ontology	GO:0009812	1	30	0.093344938658	0.402062161328	UGT8
regulation of platelet activation	Gene Ontology	GO:0010543	1	30	0.093344938658	0.402062161328	PRKG1
response to interleukin-6	Gene Ontology	GO:0070741	1	30	0.093344938658	0.402062161328	ZCCHC11
plasma lipoprotein particle clearance	Gene Ontology	GO:0034381	1	31	0.0962064384559	0.407761641173	VLDLR
macrophage derived foam cell differentiation	Gene Ontology	GO:0010742	1	31	0.0962064384559	0.407761641173	AGT
positive regulation of lipid kinase activity	Gene Ontology	GO:0090218	1	31	0.0962064384559	0.407761641173	ERBB4
foam cell differentiation	Gene Ontology	GO:0090077	1	31	0.0962064384559	0.407761641173	AGT
sodium channel regulator activity	Gene Ontology	GO:0017080	1	32	0.0990589085269	0.410524520427	AGT
glucuronate metabolic process	Gene Ontology	GO:0019585	1	32	0.0990589085269	0.410524520427	UGT8
uronic acid metabolic process	Gene Ontology	GO:0006063	1	32	0.0990589085269	0.410524520427	UGT8
regulation of cardiac muscle hypertrophy	Gene Ontology	GO:0010611	1	32	0.0990589085269	0.410524520427	AGT
establishment of spindle localization	Gene Ontology	GO:0051293	1	33	0.10190237736	0.41098482478	DYNC1H1
positive regulation of protein tyrosine kinase activity	Gene Ontology	GO:0061098	1	33	0.10190237736	0.41098482478	AGT
galactosyltransferase activity	Gene Ontology	GO:0008378	1	33	0.10190237736	0.41098482478	UGT8
regulation of cardiac muscle tissue growth	Gene Ontology	GO:0055021	1	33	0.10190237736	0.41098482478	ERBB4
oxidoreductase activity, acting on the aldehyde or oxo group of donors, NAD or NADP as acceptor	Gene Ontology	GO:0016620	1	33	0.10190237736	0.41098482478	FAR2
glucuronosyltransferase activity	Gene Ontology	GO:0015020	1	33	0.10190237736	0.41098482478	UGT8
regulation of fatty acid biosynthetic process	Gene Ontology	GO:0042304	1	33	0.10190237736	0.41098482478	AGT
peptidase activator activity	Gene Ontology	GO:0016504	1	33	0.10190237736	0.41098482478	FN1
positive regulation of multicellular organism growth	Gene Ontology	GO:0040018	1	33	0.10190237736	0.41098482478	AGT
regulation of action potential	Gene Ontology	GO:0098900	1	33	0.10190237736	0.41098482478	DSG2
regulation of renal system process	Gene Ontology	GO:0098801	1	34	0.104736873356	0.413290409216	AGT
ion channel inhibitor activity	Gene Ontology	GO:0008200	1	34	0.104736873356	0.413290409216	KCNMB2
plasma lipoprotein particle organization	Gene Ontology	GO:0071827	1	34	0.104736873356	0.413290409216	AGT
cyclic nucleotide binding	Gene Ontology	GO:0030551	1	34	0.104736873356	0.413290409216	PRKG1
regulation of muscle hypertrophy	Gene Ontology	GO:0014743	1	34	0.104736873356	0.413290409216	AGT
neuronal action potential	Gene Ontology	GO:0019228	1	34	0.104736873356	0.413290409216	KCNMB2
negative regulation of endocytosis	Gene Ontology	GO:0045806	1	34	0.104736873356	0.413290409216	PRTN3
olfactory bulb development	Gene Ontology	GO:0021772	1	35	0.107562424824	0.414837285484	ERBB4
plasma lipoprotein particle	Gene Ontology	GO:0034358	1	35	0.107562424824	0.414837285484	VLDLR
cytoplasmic microtubule organization	Gene Ontology	GO:0031122	1	35	0.107562424824	0.414837285484	PCM12
channel inhibitor activity	Gene Ontology	GO:0016248	1	35	0.107562424824	0.414837285484	KCNMB2
calcium channel regulator activity	Gene Ontology	GO:0005246	1	35	0.107562424824	0.414837285484	PRKG1
signal sequence binding	Gene Ontology	GO:0005048	1	35	0.107562424824	0.414837285484	TNPO1
positive regulation of axon extension	Gene Ontology	GO:0045773	1	35	0.107562424824	0.414837285484	FN1
lipoprotein particle	Gene Ontology	GO:1990777	1	35	0.107562424824	0.414837285484	VLDLR
spindle localization	Gene Ontology	GO:0051653	1	36	0.110379059985	0.416926245562	DYNC1H1
peptide hormone processing	Gene Ontology	GO:0016486	1	36	0.110379059985	0.416926245562	AGT
cellular response to dsRNA	Gene Ontology	GO:0071359	1	36	0.110379059985	0.416926245562	ZCCHC11
ion gated channel activity	Gene Ontology	GO:0022839	1	36	0.110379059985	0.416926245562	KCNMB2
RNA polymerase II transcription coactivator activity	Gene Ontology	GO:0001105	1	36	0.110379059985	0.416926245562	SMARCA2
protein-lipid complex subunit organization	Gene Ontology	GO:0071825	1	37	0.113186806971	0.416926245562	AGT
positive regulation of nitric oxide biosynthetic process	Gene Ontology	GO:0045429	1	37	0.113186806971	0.416926245562	AGT
protein-lipid complex	Gene Ontology	GO:0032994	1	37	0.113186806971	0.416926245562	VLDLR
dendritic cell differentiation	Gene Ontology	GO:0097028	1	37	0.113186806971	0.416926245562	PRTN3
cardiac muscle cell proliferation	Gene Ontology	GO:0060038	1	37	0.113186806971	0.416926245562	ERBB4
response to progesterone	Gene Ontology	GO:0032570	1	37	0.113186806971	0.416926245562	DSG2
positive regulation of nitric oxide metabolic process	Gene Ontology	GO:1904407	1	37	0.113186806971	0.416926245562	AGT
regulation of NIK/NF-kappaB signaling	Gene Ontology	GO:1901222	1	37	0.113186806971	0.416926245562	AGT
olfactory lobe development	Gene Ontology	GO:0021988	1	37	0.113186806971	0.416926245562	ERBB4
microbody lumen	Gene Ontology	GO:0031907	1	38	0.115985693824	0.422993856427	FAR2
peroxisomal matrix	Gene Ontology	GO:0005782	1	38	0.115985693824	0.422993856427	FAR2
regulation of phosphatidylinositol 3-kinase activity	Gene Ontology	GO:0043551	1	39	0.1187757485	0.422993856427	ERBB4
aminopeptidase activity	Gene Ontology	GO:0004177	1	39	0.1187757485	0.422993856427	LNPEP
positive regulation of kidney development	Gene Ontology	GO:0090184	1	39	0.1187757485	0.422993856427	AGT
regulation of heart growth	Gene Ontology	GO:0060420	1	39	0.1187757485	0.422993856427	ERBB4
regulation of systemic arterial blood pressure by hormone	Gene Ontology	GO:0001990	1	39	0.1187757485	0.422993856427	AGT
T-tubule	Gene Ontology	GO:0030315	1	39	0.1187757485	0.422993856427	AHNAK
regulation of sodium ion transmembrane transporter activity	Gene Ontology	GO:2000649	1	39	0.1187757485	0.422993856427	AGT
regulation of vasodilation	Gene Ontology	GO:0042312	1	40	0.121556998864	0.424088445107	AGT
positive regulation of phospholipid metabolic process	Gene Ontology	GO:1903727	1	40	0.121556998864	0.424088445107	ERBB4
positive regulation of blood pressure	Gene Ontology	GO:0045777	1	40	0.121556998864	0.424088445107	AGT
blood vessel remodeling	Gene Ontology	GO:0001974	1	40	0.121556998864	0.424088445107	AGT
dynein complex	Gene Ontology	GO:0030286	1	40	0.121556998864	0.424088445107	DYNC1H1
cytosolic small ribosomal subunit	Gene Ontology	GO:0022627	1	40	0.121556998864	0.424088445107	RPS27
gene silencing by miRNA	Gene Ontology	GO:0035195	1	41	0.124329472695	0.424615878649	ZCCHC11
cell communication involved in cardiac conduction	Gene Ontology	GO:0086065	1	41	0.124329472695	0.424615878649	DSG2
lactation	Gene Ontology	GO:0007595	1	41	0.124329472695	0.424615878649	ERBB4
peptidyl-tyrosine autophosphorylation	Gene Ontology	GO:0038083	1	42	0.127093197683	0.427039824542	BMX
microtubule anchoring	Gene Ontology	GO:0034453	1	42	0.127093197683	0.427039824542	PCM12
regulation of catecholamine secretion	Gene Ontology	GO:0050433	1	42	0.127093197683	0.427039824542	AGT
protein localization to cell surface	Gene Ontology	GO:0034394	1	42	0.127093197683	0.427039824542	ERBB4
carbohydrate derivative transport	Gene Ontology	GO:1901264	1	42	0.127093197683	0.427039824542	VLDLR
regulation of cardiac muscle cell contraction	Gene Ontology	GO:0086004	1	42	0.127093197683	0.427039824542	DSG2
endodermal cell differentiation	Gene Ontology	GO:0035987	1	43	0.129848201433	0.428968799824	FN1
negative regulation of cytokine secretion	Gene Ontology	GO:0050710	1	43	0.129848201433	0.428968799824	FN1
positive regulation of reactive oxygen species biosynthetic process	Gene Ontology	GO:1903428	1	43	0.129848201433	0.428968799824	AGT
heterotypic cell-cell adhesion	Gene Ontology	GO:0034113	1	43	0.129848201433	0.428968799824	DSG2
regulation of cardiac muscle tissue development	Gene Ontology	GO:0055024	1	43	0.129848201433	0.428968799824	ERBB4
cardiac muscle cell action potential	Gene Ontology	GO:0086001	1	43	0.129848201433	0.428968799824	DSG2
protein import into nucleus, translocation	Gene Ontology	GO:0000060	1	44	0.13259451146	0.43300659745	TNPO1
endocrine hormone secretion	Gene Ontology	GO:0060986	1	44	0.13259451146	0.43300659745	AGT
ventral spinal cord development	Gene Ontology	GO:0021517	1	44	0.13259451146	0.43300659745	VLDLR
long-chain fatty-acyl-CoA metabolic process	Gene Ontology	GO:0035336	1	44	0.13259451146	0.43300659745	FAR2
potassium channel regulator activity	Gene Ontology	GO:0015459	1	44	0.13259451146	0.43300659745	KCNMB2
posttranscriptional gene silencing by RNA	Gene Ontology	GO:0035194	1	45	0.135332155194	0.437477017485	ZCCHC11
posttranscriptional gene silencing	Gene Ontology	GO:0016441	1	45	0.135332155194	0.437477017485	ZCCHC11
oxidoreductase activity, acting on the aldehyde or oxo group of donors	Gene Ontology	GO:0016903	1	45	0.135332155194	0.437477017485	FAR2
catecholamine secretion	Gene Ontology	GO:0050432	1	46	0.138061159978	0.438537125545	AGT
response to cold	Gene Ontology	GO:0009409	1	46	0.138061159978	0.438537125545	AGT
regulation of actin filament-based movement	Gene Ontology	GO:1903115	1	46	0.138061159978	0.438537125545	DSG2
ventricular cardiac muscle tissue development	Gene Ontology	GO:0003229	1	46	0.138061159978	0.438537125545	DSG2
positive regulation of oxidoreductase activity	Gene Ontology	GO:0051353	1	46	0.138061159978	0.438537125545	AGT
non-membrane spanning protein tyrosine kinase activity	Gene Ontology	GO:0004715	1	46	0.138061159978	0.438537125545	BMX
regulation of neuronal synaptic plasticity	Gene Ontology	GO:0048168	1	47	0.140781553069	0.440579717026	AGT
positive regulation of muscle organ development	Gene Ontology	GO:0048636	1	47	0.140781553069	0.440579717026	ERBB4
regulation of lipid kinase activity	Gene Ontology	GO:0043550	1	47	0.140781553069	0.440579717026	ERBB4
endochondral bone morphogenesis	Gene Ontology	GO:0060350	1	47	0.140781553069	0.440579717026	HSPG2
acute-phase response	Gene Ontology	GO:0006953	1	47	0.140781553069	0.440579717026	FN1
positive regulation of striated muscle tissue development	Gene Ontology	GO:0045844	1	47	0.140781553069	0.440579717026	ERBB4
regulation of systemic arterial blood pressure mediated by a chemical signal	Gene Ontology	GO:0003044	1	48	0.143493361637	0.440579717026	AGT
astrocyte differentiation	Gene Ontology	GO:0048708	1	48	0.143493361637	0.440579717026	AGT
ribosomal small subunit biogenesis	Gene Ontology	GO:0042274	1	48	0.143493361637	0.440579717026	RPS27
regulation of nitric oxide biosynthetic process	Gene Ontology	GO:0045428	1	48	0.143493361637	0.440579717026	AGT
negative regulation of blood coagulation	Gene Ontology	GO:0030195	1	48	0.143493361637	0.440579717026	PRKG1
ceramide biosynthetic process	Gene Ontology	GO:0046513	1	48	0.143493361637	0.440579717026	UGT8
metalloexopeptidase activity	Gene Ontology	GO:0008235	1	48	0.143493361637	0.440579717026	LNPEP
regulation of myoblast differentiation	Gene Ontology	GO:0045661	1	48	0.143493361637	0.440579717026	MBNL3
positive regulation of dendrite development	Gene Ontology	GO:1900006	1	48	0.143493361637	0.440579717026	VLDLR
negative regulation of hemostasis	Gene Ontology	GO:1900047	1	48	0.143493361637	0.440579717026	PRKG1
platelet alpha granule lumen	Gene Ontology	GO:0031093	1	48	0.143493361637	0.440579717026	FN1
positive regulation of muscle tissue development	Gene Ontology	GO:1901863	1	48	0.143493361637	0.440579717026	ERBB4
regulation of sodium ion transmembrane transport	Gene Ontology	GO:1902305	1	49	0.146196612768	0.441873213767	AGT
lateral plasma membrane	Gene Ontology	GO:0016328	1	49	0.146196612768	0.441873213767	DSG2
lipopolysaccharide-mediated signaling pathway	Gene Ontology	GO:0031663	1	49	0.146196612768	0.441873213767	ZCCHC11
intercalated disc	Gene Ontology	GO:0014704	1	49	0.146196612768	0.441873213767	DSG2
fatty-acyl-CoA metabolic process	Gene Ontology	GO:0035337	1	49	0.146196612768	0.441873213767	FAR2
striated muscle cell proliferation	Gene Ontology	GO:0014855	1	50	0.148891333461	0.443367581152	ERBB4
sodium ion homeostasis	Gene Ontology	GO:0055078	1	50	0.148891333461	0.443367581152	AGT
RNA polymerase II core promoter sequence-specific DNA binding	Gene Ontology	GO:0000979	1	50	0.148891333461	0.443367581152	SMAD5
neural crest cell migration	Gene Ontology	GO:0001755	1	50	0.148891333461	0.443367581152	ERBB4
negative regulation of coagulation	Gene Ontology	GO:0050819	1	50	0.148891333461	0.443367581152	PRKG1
endothelial cell development	Gene Ontology	GO:0001885	1	51	0.151577550631	0.446011273835	AGT
transcriptional activator activity, RNA polymerase II transcription factor binding	Gene Ontology	GO:0001190	1	51	0.151577550631	0.446011273835	SMARCA2
transcriptional repressor activity, RNA polymerase II activating transcription factor binding	Gene Ontology	GO:0098811	1	51	0.151577550631	0.446011273835	SMARCA2
cardiac muscle hypertrophy	Gene Ontology	GO:0003300	1	51	0.151577550631	0.446011273835	AGT
ribosome assembly	Gene Ontology	GO:0042255	1	51	0.151577550631	0.446011273835	RPS27
regulation of morphogenesis of a branching structure	Gene Ontology	GO:0060688	1	51	0.151577550631	0.446011273835	AGT
L-amino acid transmembrane transporter activity	Gene Ontology	GO:0015179	1	51	0.151577550631	0.446011273835	SLC7A1i1
platelet aggregation	Gene Ontology	GO:0070527	1	52	0.154255291106	0.449838739055	PRKG1
histone acetyltransferase activity	Gene Ontology	GO:0004402	1	53	0.156924581634	0.449838739055	HCFC1
regulation of kidney development	Gene Ontology	GO:0090183	1	53	0.156924581634	0.449838739055	AGT
chondroitin sulfate metabolic process	Gene Ontology	GO:0030204	1	53	0.156924581634	0.449838739055	HSPG2
peroxisomal membrane	Gene Ontology	GO:0005778	1	53	0.156924581634	0.449838739055	FAR2
superoxide metabolic process	Gene Ontology	GO:0006801	1	53	0.156924581634	0.449838739055	AGT
microbody membrane	Gene Ontology	GO:0031903	1	53	0.156924581634	0.449838739055	FAR2
negative regulation of ion transmembrane transporter activity	Gene Ontology	GO:0032413	1	53	0.156924581634	0.449838739055	AGT
tissue regeneration	Gene Ontology	GO:0042246	1	53	0.156924581634	0.449838739055	ERBB4
striated muscle hypertrophy	Gene Ontology	GO:0014897	1	53	0.156924581634	0.449838739055	AGT
endoderm formation	Gene Ontology	GO:0001706	1	54	0.159585448872	0.452615237655	FN1
positive regulation of tyrosine phosphorylation of STAT protein	Gene Ontology	GO:0042531	1	54	0.159585448872	0.452615237655	ERBB4
positive regulation of extrinsic apoptotic signaling pathway	Gene Ontology	GO:2001238	1	54	0.159585448872	0.452615237655	AGT
peptide-lysine-N-acetyltransferase activity	Gene Ontology	GO:0061733	1	54	0.159585448872	0.452615237655	HCFC1
cardiac muscle cell development	Gene Ontology	GO:0055013	1	54	0.159585448872	0.452615237655	AGT
response to activity	Gene Ontology	GO:0014823	1	55	0.162237919399	0.453225883138	AGT
muscle hypertrophy	Gene Ontology	GO:0014896	1	55	0.162237919399	0.453225883138	AGT
forebrain neuron differentiation	Gene Ontology	GO:0021879	1	55	0.162237919399	0.453225883138	ERBB4
presynaptic membrane	Gene Ontology	GO:0042734	1	55	0.162237919399	0.453225883138	KCTD12
peptide cross-linking	Gene Ontology	GO:0018149	1	55	0.162237919399	0.453225883138	FN1
positive regulation of osteoblast differentiation	Gene Ontology	GO:0045669	1	56	0.164882019707	0.453393975326	SMAD5
muscle fiber development	Gene Ontology	GO:0048747	1	56	0.164882019707	0.453393975326	FLNC
negative regulation of muscle cell differentiation	Gene Ontology	GO:0051148	1	56	0.164882019707	0.453393975326	MBNL3
chondroitin sulfate proteoglycan metabolic process	Gene Ontology	GO:0050654	1	56	0.164882019707	0.453393975326	HSPG2
maternal process involved in female pregnancy	Gene Ontology	GO:0060135	1	56	0.164882019707	0.453393975326	DSG2
cardiac cell development	Gene Ontology	GO:0055006	1	56	0.164882019707	0.453393975326	AGT
calcium-dependent protein binding	Gene Ontology	GO:0048306	1	56	0.164882019707	0.453393975326	VLDLR
regulation of protein tyrosine kinase activity	Gene Ontology	GO:0061097	1	57	0.167517776204	0.456655601016	AGT
branching involved in ureteric bud morphogenesis	Gene Ontology	GO:0001658	1	57	0.167517776204	0.456655601016	AGT
negative regulation of cation transmembrane transport	Gene Ontology	GO:1904063	1	57	0.167517776204	0.456655601016	AGT
cytosolic large ribosomal subunit	Gene Ontology	GO:0022625	1	58	0.170145215216	0.460212242455	RPL17
regulation of tissue remodeling	Gene Ontology	GO:0034103	1	58	0.170145215216	0.460212242455	AGT
catecholamine transport	Gene Ontology	GO:0051937	1	58	0.170145215216	0.460212242455	AGT
regulation of muscle adaptation	Gene Ontology	GO:0043502	1	58	0.170145215216	0.460212242455	AGT
glycosaminoglycan catabolic process	Gene Ontology	GO:0006027	1	58	0.170145215216	0.460212242455	HSPG2
positive regulation of lipid biosynthetic process	Gene Ontology	GO:0046889	1	59	0.172764362987	0.463059199327	AGT
regulation of phospholipid metabolic process	Gene Ontology	GO:1903725	1	59	0.172764362987	0.463059199327	ERBB4
activation of phospholipase C activity	Gene Ontology	GO:0007202	1	59	0.172764362987	0.463059199327	AGT
amino acid transmembrane transport	Gene Ontology	GO:0003333	1	59	0.172764362987	0.463059199327	SLC7A1i1
regulation of smooth muscle contraction	Gene Ontology	GO:0006940	1	59	0.172764362987	0.463059199327	PRKG1
nitric oxide biosynthetic process	Gene Ontology	GO:0006809	1	59	0.172764362987	0.463059199327	AGT
glycolipid biosynthetic process	Gene Ontology	GO:0009247	1	60	0.175375245676	0.46518101991	UGT8
negative regulation of transporter activity	Gene Ontology	GO:0032410	1	60	0.175375245676	0.46518101991	AGT
transmembrane receptor protein tyrosine kinase activity	Gene Ontology	GO:0004714	1	60	0.175375245676	0.46518101991	ERBB4
L-amino acid transport	Gene Ontology	GO:0015807	1	60	0.175375245676	0.46518101991	SLC7A1i1
regulation of tyrosine phosphorylation of STAT protein	Gene Ontology	GO:0042509	1	60	0.175375245676	0.46518101991	ERBB4
negative regulation of wound healing	Gene Ontology	GO:0061045	1	60	0.175375245676	0.46518101991	PRKG1
histone H4 acetylation	Gene Ontology	GO:0043967	1	61	0.17797788936	0.469184159357	HCFC1
regulation of reactive oxygen species biosynthetic process	Gene Ontology	GO:1903426	1	61	0.17797788936	0.469184159357	AGT
positive regulation of interleukin-6 production	Gene Ontology	GO:0032755	1	62	0.180572320034	0.473545447075	ZCCHC11
peptide N-acetyltransferase activity	Gene Ontology	GO:0034212	1	62	0.180572320034	0.473545447075	HCFC1
positive regulation of endothelial cell migration	Gene Ontology	GO:0010595	1	62	0.180572320034	0.473545447075	AGT
regulation of neurological system process	Gene Ontology	GO:0031644	1	62	0.180572320034	0.473545447075	AGT
regulation of cell junction assembly	Gene Ontology	GO:1901888	1	63	0.183158563612	0.473545447075	AGT
forebrain generation of neurons	Gene Ontology	GO:0021872	1	63	0.183158563612	0.473545447075	ERBB4
platelet alpha granule	Gene Ontology	GO:0031091	1	63	0.183158563612	0.473545447075	FN1
secretory granule lumen	Gene Ontology	GO:0034774	1	63	0.183158563612	0.473545447075	FN1
aminoglycan catabolic process	Gene Ontology	GO:0006026	1	63	0.183158563612	0.473545447075	HSPG2
ureteric bud morphogenesis	Gene Ontology	GO:0060675	1	63	0.183158563612	0.473545447075	AGT
cyclic-nucleotide-mediated signaling	Gene Ontology	GO:0019935	1	63	0.183158563612	0.473545447075	PRKG1
cargo receptor activity	Gene Ontology	GO:0038024	1	63	0.183158563612	0.473545447075	VLDLR
mesonephric tubule morphogenesis	Gene Ontology	GO:0072171	1	64	0.185736645925	0.477315179529	AGT
collagen binding	Gene Ontology	GO:0005518	1	64	0.185736645925	0.477315179529	FN1
response to osmotic stress	Gene Ontology	GO:0006970	1	64	0.185736645925	0.477315179529	AGT
tyrosine phosphorylation of STAT protein	Gene Ontology	GO:0007260	1	65	0.188306592723	0.480059778258	ERBB4
regulation of calcium ion transmembrane transporter activity	Gene Ontology	GO:1901019	1	65	0.188306592723	0.480059778258	AHNAK
small ribosomal subunit	Gene Ontology	GO:0015935	1	65	0.188306592723	0.480059778258	RPS27
neural crest cell development	Gene Ontology	GO:0014032	1	65	0.188306592723	0.480059778258	ERBB4
coated pit	Gene Ontology	GO:0005905	1	65	0.188306592723	0.480059778258	VLDLR
positive regulation of axonogenesis	Gene Ontology	GO:0050772	1	66	0.190868429674	0.483697298985	FN1
negative regulation of NF-kappaB transcription factor activity	Gene Ontology	GO:0032088	1	66	0.190868429674	0.483697298985	ZCCHC11
regulation of phagocytosis	Gene Ontology	GO:0050764	1	66	0.190868429674	0.483697298985	PRTN3
regulation of calcium ion transmembrane transport	Gene Ontology	GO:1903169	1	67	0.193422182366	0.486572586047	AHNAK
positive regulation of phospholipase C activity	Gene Ontology	GO:0010863	1	67	0.193422182366	0.486572586047	AGT
mammary gland epithelium development	Gene Ontology	GO:0061180	1	68	0.195967876306	0.489823909789	ERBB4
excretion	Gene Ontology	GO:0007588	1	69	0.19850553692	0.49377607463	AGT
negative regulation of phosphatase activity	Gene Ontology	GO:0010923	1	69	0.19850553692	0.49377607463	LKAP
regulation of phospholipase C activity	Gene Ontology	GO:1900274	1	69	0.19850553692	0.49377607463	AGT
glycosphingolipid metabolic process	Gene Ontology	GO:0006687	1	70	0.201035189555	0.49380113323	UGT8
regulation of amine transport	Gene Ontology	GO:0051952	1	70	0.201035189555	0.49380113323	AGT
cellular response to mechanical stimulus	Gene Ontology	GO:0071260	1	70	0.201035189555	0.49380113323	AGT
DNA-dependent ATPase activity	Gene Ontology	GO:0008094	1	70	0.201035189555	0.49380113323	SMARCA2
negative regulation of angiogenesis	Gene Ontology	GO:0016525	1	70	0.201035189555	0.49380113323	AGT
ubiquitin-specific protease activity	Gene Ontology	GO:0004843	1	70	0.201035189555	0.49380113323	USP34
histone methyltransferase complex	Gene Ontology	GO:0035097	1	70	0.201035189555	0.49380113323	HCFC1
microtubule motor activity	Gene Ontology	GO:0003777	1	71	0.203556859477	0.496181973005	DYNC1H1
response to dsRNA	Gene Ontology	GO:0043331	1	71	0.203556859477	0.496181973005	ZCCHC11
regulation of multicellular organism growth	Gene Ontology	GO:0040014	1	71	0.203556859477	0.496181973005	AGT
monoamine transport	Gene Ontology	GO:0015844	1	71	0.203556859477	0.496181973005	AGT
oogenesis	Gene Ontology	GO:0048477	1	71	0.203556859477	0.496181973005	LKAP
negative regulation of blood vessel morphogenesis	Gene Ontology	GO:2000181	1	72	0.206070571872	0.4989061282	AGT
nephron tubule morphogenesis	Gene Ontology	GO:0072078	1	72	0.206070571872	0.4989061282	AGT
regulation of steroid metabolic process	Gene Ontology	GO:0019218	1	72	0.206070571872	0.4989061282	AGT
neural crest cell differentiation	Gene Ontology	GO:0014033	1	73	0.208576351848	0.500305124538	ERBB4
substrate adhesion-dependent cell spreading	Gene Ontology	GO:0034446	1	73	0.208576351848	0.500305124538	FN1
amino acid transmembrane transporter activity	Gene Ontology	GO:0015171	1	73	0.208576351848	0.500305124538	SLC7A1i1
negative regulation of ion transmembrane transport	Gene Ontology	GO:0034766	1	73	0.208576351848	0.500305124538	AGT
antigen processing and presentation of exogenous peptide antigen via MHC class I	Gene Ontology	GO:0042590	1	74	0.211074224433	0.500305124538	LNPEP
nephron epithelium morphogenesis	Gene Ontology	GO:0072088	1	74	0.211074224433	0.500305124538	AGT
collagen catabolic process	Gene Ontology	GO:0030574	1	74	0.211074224433	0.500305124538	PRTN3
SWI/SNF superfamily-type complex	Gene Ontology	GO:0070603	1	74	0.211074224433	0.500305124538	SMARCA2
endoderm development	Gene Ontology	GO:0007492	1	74	0.211074224433	0.500305124538	FN1
glial cell development	Gene Ontology	GO:0021782	1	74	0.211074224433	0.500305124538	AGT
regulation of epidermal growth factor receptor signaling pathway	Gene Ontology	GO:0042058	1	74	0.211074224433	0.500305124538	AGT
nitric oxide metabolic process	Gene Ontology	GO:0046209	1	74	0.211074224433	0.500305124538	AGT
muscle adaptation	Gene Ontology	GO:0043500	1	75	0.213564214575	0.501605852589	AGT
mitotic spindle organization	Gene Ontology	GO:0007052	1	75	0.213564214575	0.501605852589	DYNC1H1
regulation of neural precursor cell proliferation	Gene Ontology	GO:2000177	1	75	0.213564214575	0.501605852589	PTPRZ1
amine transport	Gene Ontology	GO:0015837	1	75	0.213564214575	0.501605852589	AGT
negative regulation of protein dephosphorylation	Gene Ontology	GO:0035308	1	75	0.213564214575	0.501605852589	LKAP
ruffle membrane	Gene Ontology	GO:0032587	1	76	0.216046347145	0.503332300493	BMX
negative regulation of vasculature development	Gene Ontology	GO:1901343	1	76	0.216046347145	0.503332300493	AGT
cellular monovalent inorganic cation homeostasis	Gene Ontology	GO:0030004	1	76	0.216046347145	0.503332300493	AGT
renal tubule morphogenesis	Gene Ontology	GO:0061333	1	76	0.216046347145	0.503332300493	AGT
cysteine-type endopeptidase activity	Gene Ontology	GO:0004197	1	76	0.216046347145	0.503332300493	USP34
Rho guanyl-nucleotide exchange factor activity	Gene Ontology	GO:0005089	1	76	0.216046347145	0.503332300493	PLEKHG3
nephron morphogenesis	Gene Ontology	GO:0072028	1	76	0.216046347145	0.503332300493	AGT
regulation of cardiac muscle contraction	Gene Ontology	GO:0055117	1	77	0.218520646935	0.504293586835	DSG2
regulation of ERBB signaling pathway	Gene Ontology	GO:1901184	1	77	0.218520646935	0.504293586835	AGT
transmembrane receptor protein kinase activity	Gene Ontology	GO:0019199	1	77	0.218520646935	0.504293586835	ERBB4
negative regulation of dephosphorylation	Gene Ontology	GO:0035305	1	77	0.218520646935	0.504293586835	LKAP
reactive nitrogen species metabolic process	Gene Ontology	GO:2001057	1	78	0.220987138658	0.506329850851	AGT
regulation of gliogenesis	Gene Ontology	GO:0014013	1	78	0.220987138658	0.506329850851	PTPRZ1
ceramide metabolic process	Gene Ontology	GO:0006672	1	78	0.220987138658	0.506329850851	UGT8
myoblast differentiation	Gene Ontology	GO:0045445	1	78	0.220987138658	0.506329850851	MBNL3
endocrine process	Gene Ontology	GO:0050886	1	79	0.22344584695	0.508178466761	AGT
negative regulation of transmembrane transport	Gene Ontology	GO:0034763	1	79	0.22344584695	0.508178466761	AGT
antiporter activity	Gene Ontology	GO:0015297	1	79	0.22344584695	0.508178466761	SLC7A1i1
multicellular organismal catabolic process	Gene Ontology	GO:0044243	1	79	0.22344584695	0.508178466761	PRTN3
bone morphogenesis	Gene Ontology	GO:0060349	1	80	0.225896796369	0.508178466761	HSPG2
positive regulation of ossification	Gene Ontology	GO:0045778	1	80	0.225896796369	0.508178466761	SMAD5
regulation of sodium ion transport	Gene Ontology	GO:0002028	1	80	0.225896796369	0.508178466761	AGT
alpha-beta T cell differentiation	Gene Ontology	GO:0046632	1	80	0.225896796369	0.508178466761	BMX
lysosomal lumen	Gene Ontology	GO:0043202	1	80	0.225896796369	0.508178466761	HSPG2
positive regulation of phospholipase activity	Gene Ontology	GO:0010518	1	81	0.228340011396	0.508178466761	AGT
ubiquitin-like protein-specific protease activity	Gene Ontology	GO:0019783	1	81	0.228340011396	0.508178466761	USP34
transcriptional repressor activity, RNA polymerase II transcription factor binding	Gene Ontology	GO:0001191	1	81	0.228340011396	0.508178466761	SMARCA2
positive regulation of reactive oxygen species metabolic process	Gene Ontology	GO:2000379	1	81	0.228340011396	0.508178466761	AGT
oligodendrocyte differentiation	Gene Ontology	GO:0048709	1	81	0.228340011396	0.508178466761	PTPRZ1
secretion by tissue	Gene Ontology	GO:0032941	1	81	0.228340011396	0.508178466761	ERBB4
microbody part	Gene Ontology	GO:0044438	1	81	0.228340011396	0.508178466761	FAR2
cytoplasmic membrane-bounded vesicle lumen	Gene Ontology	GO:0060205	1	81	0.228340011396	0.508178466761	FN1
peroxisomal part	Gene Ontology	GO:0044439	1	81	0.228340011396	0.508178466761	FAR2
cell-substrate junction assembly	Gene Ontology	GO:0007044	1	81	0.228340011396	0.508178466761	FN1
regulation of cation channel activity	Gene Ontology	GO:2001257	1	82	0.230775516433	0.509218366819	AHNAK
vesicle lumen	Gene Ontology	GO:0031983	1	82	0.230775516433	0.509218366819	FN1
positive regulation of blood circulation	Gene Ontology	GO:1903524	1	82	0.230775516433	0.509218366819	AGT
reactive oxygen species biosynthetic process	Gene Ontology	GO:1903409	1	82	0.230775516433	0.509218366819	AGT
filopodium	Gene Ontology	GO:0030175	1	82	0.230775516433	0.509218366819	DYNC1H1
N-acetyltransferase activity	Gene Ontology	GO:0008080	1	83	0.233203335806	0.509218366819	HCFC1
sphingolipid biosynthetic process	Gene Ontology	GO:0030148	1	83	0.233203335806	0.509218366819	UGT8
regulation of blood coagulation	Gene Ontology	GO:0030193	1	83	0.233203335806	0.509218366819	PRKG1
retinoid metabolic process	Gene Ontology	GO:0001523	1	83	0.233203335806	0.509218366819	HSPG2
regulation of hemostasis	Gene Ontology	GO:1900046	1	83	0.233203335806	0.509218366819	PRKG1
voltage-gated potassium channel complex	Gene Ontology	GO:0008076	1	84	0.235623493766	0.511017195556	KCNMB2
thioester metabolic process	Gene Ontology	GO:0035383	1	84	0.235623493766	0.511017195556	FAR2
regulation of fatty acid metabolic process	Gene Ontology	GO:0019217	1	84	0.235623493766	0.511017195556	AGT
Golgi lumen	Gene Ontology	GO:0005796	1	84	0.235623493766	0.511017195556	HSPG2
acyl-CoA metabolic process	Gene Ontology	GO:0006637	1	84	0.235623493766	0.511017195556	FAR2
cellular response to interleukin-1	Gene Ontology	GO:0071347	1	85	0.238036014485	0.512338458787	VLDLR
ovulation cycle process	Gene Ontology	GO:0022602	1	85	0.238036014485	0.512338458787	AGT
vacuolar lumen	Gene Ontology	GO:0005775	1	85	0.238036014485	0.512338458787	HSPG2
potassium channel complex	Gene Ontology	GO:0034705	1	85	0.238036014485	0.512338458787	KCNMB2
regulation of systemic arterial blood pressure	Gene Ontology	GO:0003073	1	86	0.240440922061	0.514483211472	AGT
platelet degranulation	Gene Ontology	GO:0002576	1	86	0.240440922061	0.514483211472	FN1
smooth muscle cell proliferation	Gene Ontology	GO:0048659	1	86	0.240440922061	0.514483211472	AGT
positive regulation of peptidyl-serine phosphorylation	Gene Ontology	GO:0033138	1	87	0.242838240513	0.51566445733	AGT
regulation of oxidoreductase activity	Gene Ontology	GO:0051341	1	87	0.242838240513	0.51566445733	AGT
ciliary basal body	Gene Ontology	GO:0036064	1	87	0.242838240513	0.51566445733	PCM12
regulation of coagulation	Gene Ontology	GO:0050818	1	87	0.242838240513	0.51566445733	PRKG1
phospholipase C-activating G-protein coupled receptor signaling pathway	Gene Ontology	GO:0007200	1	88	0.245227993787	0.51566445733	AGT
methyltransferase complex	Gene Ontology	GO:0034708	1	88	0.245227993787	0.51566445733	HCFC1
endothelial cell differentiation	Gene Ontology	GO:0045446	1	88	0.245227993787	0.51566445733	AGT
regulation of axon extension	Gene Ontology	GO:0030516	1	88	0.245227993787	0.51566445733	FN1
RNA polymerase II transcription cofactor activity	Gene Ontology	GO:0001104	1	88	0.245227993787	0.51566445733	SMARCA2
antigen processing and presentation of exogenous peptide antigen via MHC class II	Gene Ontology	GO:0019886	1	88	0.245227993787	0.51566445733	DYNC1H1
diterpenoid metabolic process	Gene Ontology	GO:0016101	1	88	0.245227993787	0.51566445733	HSPG2
cardiac muscle cell differentiation	Gene Ontology	GO:0055007	1	89	0.247610205752	0.518966636154	AGT
serine-type endopeptidase inhibitor activity	Gene Ontology	GO:0004867	1	90	0.249984900202	0.522231527629	AGT
regulation of striated muscle contraction	Gene Ontology	GO:0006942	1	90	0.249984900202	0.522231527629	DSG2
core promoter sequence-specific DNA binding	Gene Ontology	GO:0001046	1	91	0.252352100857	0.523328728217	SMAD5
body fluid secretion	Gene Ontology	GO:0007589	1	91	0.252352100857	0.523328728217	ERBB4
nephron tubule development	Gene Ontology	GO:0072080	1	91	0.252352100857	0.523328728217	AGT
positive regulation of protein import into nucleus	Gene Ontology	GO:0042307	1	91	0.252352100857	0.523328728217	ERBB4
organic acid transmembrane transport	Gene Ontology	GO:1903825	1	91	0.252352100857	0.523328728217	SLC7A1i1
kidney morphogenesis	Gene Ontology	GO:0060993	1	91	0.252352100857	0.523328728217	AGT
cardiac muscle contraction	Gene Ontology	GO:0060048	1	91	0.252352100857	0.523328728217	SMAD5
antigen processing and presentation of peptide antigen via MHC class II	Gene Ontology	GO:0002495	1	92	0.254711831361	0.524384132894	DYNC1H1
regulation of phospholipase activity	Gene Ontology	GO:0010517	1	92	0.254711831361	0.524384132894	AGT
chondrocyte differentiation	Gene Ontology	GO:0002062	1	92	0.254711831361	0.524384132894	HSPG2
positive regulation of epithelial cell migration	Gene Ontology	GO:0010634	1	93	0.257064115282	0.525102009355	AGT
positive regulation of protein import	Gene Ontology	GO:1904591	1	93	0.257064115282	0.525102009355	ERBB4
erythrocyte differentiation	Gene Ontology	GO:0030218	1	93	0.257064115282	0.525102009355	SMAD5
positive regulation of lipase activity	Gene Ontology	GO:0060193	1	93	0.257064115282	0.525102009355	AGT
large ribosomal subunit	Gene Ontology	GO:0015934	1	93	0.257064115282	0.525102009355	RPL17
proteoglycan metabolic process	Gene Ontology	GO:0006029	1	93	0.257064115282	0.525102009355	HSPG2
negative regulation of homotypic cell-cell adhesion	Gene Ontology	GO:0034111	1	94	0.259408976117	0.525485127962	PRKG1
extrinsic component of cytoplasmic side of plasma membrane	Gene Ontology	GO:0031234	1	94	0.259408976117	0.525485127962	BMX
embryonic skeletal system morphogenesis	Gene Ontology	GO:0048704	1	94	0.259408976117	0.525485127962	HSPG2
antigen processing and presentation of peptide or polysaccharide antigen via MHC class II	Gene Ontology	GO:0002504	1	94	0.259408976117	0.525485127962	DYNC1H1
endoplasmic reticulum-Golgi intermediate compartment	Gene Ontology	GO:0005793	1	94	0.259408976117	0.525485127962	FN1
renal tubule development	Gene Ontology	GO:0061326	1	94	0.259408976117	0.525485127962	AGT
transcription factor activity, RNA polymerase II distal enhancer sequence-specific binding	Gene Ontology	GO:0003705	1	95	0.261746437287	0.528244388432	HCFC1
peptidyl-tyrosine dephosphorylation	Gene Ontology	GO:0035335	1	95	0.261746437287	0.528244388432	PTPRZ1
memory	Gene Ontology	GO:0007613	1	95	0.261746437287	0.528244388432	VLDLR
regulation of striated muscle tissue development	Gene Ontology	GO:0016202	1	95	0.261746437287	0.528244388432	ERBB4
phototransduction, visible light	Gene Ontology	GO:0007603	1	96	0.264076522139	0.529423084997	HSPG2
protein tyrosine phosphatase activity	Gene Ontology	GO:0004725	1	96	0.264076522139	0.529423084997	PTPRZ1
glycoprotein binding	Gene Ontology	GO:0001948	1	96	0.264076522139	0.529423084997	VLDLR
regulation of muscle organ development	Gene Ontology	GO:0048634	1	97	0.266399253946	0.530516271294	ERBB4
regulation of interleukin-6 production	Gene Ontology	GO:0032675	1	97	0.266399253946	0.530516271294	ZCCHC11
regulation of muscle tissue development	Gene Ontology	GO:1901861	1	97	0.266399253946	0.530516271294	ERBB4
centrosome organization	Gene Ontology	GO:0051297	1	97	0.266399253946	0.530516271294	PCM12
female gonad development	Gene Ontology	GO:0008585	1	97	0.266399253946	0.530516271294	AGT
NIK/NF-kappaB signaling	Gene Ontology	GO:0038061	1	98	0.26871465591	0.532508297863	AGT
exopeptidase activity	Gene Ontology	GO:0008238	1	98	0.26871465591	0.532508297863	LNPEP
N-acyltransferase activity	Gene Ontology	GO:0016410	1	98	0.26871465591	0.532508297863	HCFC1
erythrocyte homeostasis	Gene Ontology	GO:0034101	1	99	0.271022751156	0.533080903619	SMAD5
microtubule-based transport	Gene Ontology	GO:0010970	1	99	0.271022751156	0.533080903619	PCM12
acetyltransferase activity	Gene Ontology	GO:0016407	1	99	0.271022751156	0.533080903619	HCFC1
positive regulation of cell-substrate adhesion	Gene Ontology	GO:0010811	1	99	0.271022751156	0.533080903619	FN1
terpenoid metabolic process	Gene Ontology	GO:0006721	1	99	0.271022751156	0.533080903619	HSPG2
regulation of dendrite development	Gene Ontology	GO:0050773	1	99	0.271022751156	0.533080903619	VLDLR
antigen processing and presentation of peptide antigen via MHC class I	Gene Ontology	GO:0002474	1	100	0.273323562739	0.536368649212	LNPEP
spinal cord development	Gene Ontology	GO:0021510	1	100	0.273323562739	0.536368649212	VLDLR
ovulation cycle	Gene Ontology	GO:0042698	1	101	0.27561711364	0.53756900044	AGT
centriole	Gene Ontology	GO:0005814	1	101	0.27561711364	0.53756900044	PCM12
interleukin-6 production	Gene Ontology	GO:0032635	1	101	0.27561711364	0.53756900044	ZCCHC11
regulation of extent of cell growth	Gene Ontology	GO:0061387	1	101	0.27561711364	0.53756900044	FN1
negative regulation of protein secretion	Gene Ontology	GO:0050709	1	102	0.277903426768	0.539558893125	FN1
early endosome membrane	Gene Ontology	GO:0031901	1	102	0.277903426768	0.539558893125	SNX13
myelination	Gene Ontology	GO:0042552	1	102	0.277903426768	0.539558893125	UGT8
development of primary female sexual characteristics	Gene Ontology	GO:0046545	1	102	0.277903426768	0.539558893125	AGT
dendrite morphogenesis	Gene Ontology	GO:0048813	1	103	0.28018252496	0.540079311091	VLDLR
cerebral cortex development	Gene Ontology	GO:0021987	1	103	0.28018252496	0.540079311091	VLDLR
ensheathment of neurons	Gene Ontology	GO:0007272	1	104	0.28245443098	0.540079311091	UGT8
axon ensheathment	Gene Ontology	GO:0008366	1	104	0.28245443098	0.540079311091	UGT8
protease binding	Gene Ontology	GO:0002020	1	104	0.28245443098	0.540079311091	FN1
positive regulation of protein localization to nucleus	Gene Ontology	GO:1900182	1	104	0.28245443098	0.540079311091	ERBB4
regulation of Rho protein signal transduction	Gene Ontology	GO:0035023	1	105	0.284719167521	0.540079311091	PLEKHG3
integrin binding	Gene Ontology	GO:0005178	1	105	0.284719167521	0.540079311091	FN1
ubiquitinyl hydrolase activity	Gene Ontology	GO:0036459	1	105	0.284719167521	0.540079311091	USP34
renal system process	Gene Ontology	GO:0003014	1	105	0.284719167521	0.540079311091	AGT
microtubule organizing center organization	Gene Ontology	GO:0031023	1	105	0.284719167521	0.540079311091	PCM12
phosphatidylinositol phosphate binding	Gene Ontology	GO:1901981	1	105	0.284719167521	0.540079311091	SNX13
positive regulation of nucleocytoplasmic transport	Gene Ontology	GO:0046824	1	106	0.286976757204	0.541949459505	ERBB4
glycosaminoglycan biosynthetic process	Gene Ontology	GO:0006024	1	106	0.286976757204	0.541949459505	HSPG2
regulation of osteoblast differentiation	Gene Ontology	GO:0045667	1	106	0.286976757204	0.541949459505	SMAD5
nephron epithelium development	Gene Ontology	GO:0072009	1	106	0.286976757204	0.541949459505	AGT
alpha-beta T cell activation	Gene Ontology	GO:0046631	1	107	0.289227222578	0.542592815945	BMX
endothelium development	Gene Ontology	GO:0003158	1	107	0.289227222578	0.542592815945	AGT
positive regulation of inflammatory response	Gene Ontology	GO:0050729	1	107	0.289227222578	0.542592815945	AGT
Z disc	Gene Ontology	GO:0030018	1	107	0.289227222578	0.542592815945	FLNC
RNA 3'-end processing	Gene Ontology	GO:0031123	1	107	0.289227222578	0.542592815945	ZCCHC11
aminoglycan biosynthetic process	Gene Ontology	GO:0006023	1	107	0.289227222578	0.542592815945	HSPG2
feeding behavior	Gene Ontology	GO:0007631	1	107	0.289227222578	0.542592815945	AGT
cardiocyte differentiation	Gene Ontology	GO:0035051	1	108	0.291470586123	0.545600504186	AGT
regulation of endothelial cell migration	Gene Ontology	GO:0010594	1	108	0.291470586123	0.545600504186	AGT
detection of visible light	Gene Ontology	GO:0009584	1	109	0.293706870246	0.548581787597	HSPG2
cellular response to starvation	Gene Ontology	GO:0009267	1	109	0.293706870246	0.548581787597	VLDLR
regulation of lipase activity	Gene Ontology	GO:0060191	1	110	0.295936097285	0.550778735547	AGT
response to interleukin-1	Gene Ontology	GO:0070555	1	110	0.295936097285	0.550778735547	VLDLR
response to calcium ion	Gene Ontology	GO:0051592	1	111	0.298158289504	0.552057021189	KCNMB2
phototransduction	Gene Ontology	GO:0007602	1	111	0.298158289504	0.552057021189	HSPG2
cytoskeleton-dependent intracellular transport	Gene Ontology	GO:0030705	1	112	0.300373469102	0.55382137773	PCM12
glycolipid metabolic process	Gene Ontology	GO:0006664	1	112	0.300373469102	0.55382137773	UGT8
formation of primary germ layer	Gene Ontology	GO:0001704	1	112	0.300373469102	0.55382137773	FN1
axon extension	Gene Ontology	GO:0048675	1	113	0.302581658204	0.555420890185	FN1
actin filament binding	Gene Ontology	GO:0051015	1	113	0.302581658204	0.555420890185	FLNC
regulation of peptidyl-serine phosphorylation	Gene Ontology	GO:0033135	1	114	0.304782878867	0.55746053023	AGT
collagen metabolic process	Gene Ontology	GO:0032963	1	114	0.304782878867	0.55746053023	PRTN3
female sex differentiation	Gene Ontology	GO:0046660	1	114	0.304782878867	0.55746053023	AGT
liposaccharide metabolic process	Gene Ontology	GO:1903509	1	115	0.306977153077	0.558421603599	UGT8
cholesterol metabolic process	Gene Ontology	GO:0008203	1	115	0.306977153077	0.558421603599	VLDLR
nuclear periphery	Gene Ontology	GO:0034399	1	115	0.306977153077	0.558421603599	TNPO1
apoptotic mitochondrial changes	Gene Ontology	GO:0008637	1	116	0.309164502752	0.559471785943	ERBB4
mesoderm development	Gene Ontology	GO:0007498	1	117	0.311344949741	0.560640166541	BMX
protein stabilization	Gene Ontology	GO:0050821	1	117	0.311344949741	0.560640166541	HCFC1
hormone activity	Gene Ontology	GO:0005179	1	117	0.311344949741	0.560640166541	AGT
secondary alcohol metabolic process	Gene Ontology	GO:1902652	1	118	0.313518515823	0.56143028454	VLDLR
membrane lipid biosynthetic process	Gene Ontology	GO:0046467	1	118	0.313518515823	0.56143028454	UGT8
myeloid cell homeostasis	Gene Ontology	GO:0002262	1	118	0.313518515823	0.56143028454	SMAD5
potassium channel activity	Gene Ontology	GO:0005267	1	119	0.315685222709	0.56143028454	KCNMB2
protein deubiquitination	Gene Ontology	GO:0016579	1	119	0.315685222709	0.56143028454	USP34
spermatid development	Gene Ontology	GO:0007286	1	119	0.315685222709	0.56143028454	SMARCA2
negative regulation of ion transport	Gene Ontology	GO:0043271	1	119	0.315685222709	0.56143028454	AGT
monovalent inorganic cation homeostasis	Gene Ontology	GO:0055067	1	119	0.315685222709	0.56143028454	AGT
multicellular organismal macromolecule metabolic process	Gene Ontology	GO:0044259	1	119	0.315685222709	0.56143028454	PRTN3
isoprenoid metabolic process	Gene Ontology	GO:0006720	1	120	0.317845092041	0.563612968342	HSPG2
nucleotidyltransferase activity	Gene Ontology	GO:0016779	1	121	0.319998145393	0.565861174114	ZCCHC11
mucopolysaccharide metabolic process	Gene Ontology	GO:1903510	1	121	0.319998145393	0.565861174114	HSPG2
regulation of wound healing	Gene Ontology	GO:0061041	1	122	0.322144404271	0.56691207276	PRKG1
motor activity	Gene Ontology	GO:0003774	1	122	0.322144404271	0.56691207276	DYNC1H1
I band	Gene Ontology	GO:0031674	1	122	0.322144404271	0.56691207276	FLNC
regulation of lipid biosynthetic process	Gene Ontology	GO:0046890	1	122	0.322144404271	0.56691207276	AGT
growth factor receptor binding	Gene Ontology	GO:0070851	1	122	0.322144404271	0.56691207276	ERBB4
regulation of phosphatase activity	Gene Ontology	GO:0010921	1	123	0.324283890113	0.568948141527	LKAP
sodium ion transmembrane transport	Gene Ontology	GO:0035725	1	123	0.324283890113	0.568948141527	AGT
detection of light stimulus	Gene Ontology	GO:0009583	1	123	0.324283890113	0.568948141527	HSPG2
regulation of cell shape	Gene Ontology	GO:0008360	1	124	0.326416624289	0.569725125124	FN1
positive regulation of NF-kappaB transcription factor activity	Gene Ontology	GO:0051092	1	124	0.326416624289	0.569725125124	AGT
spindle organization	Gene Ontology	GO:0007051	1	124	0.326416624289	0.569725125124	DYNC1H1
carboxylic acid transmembrane transporter activity	Gene Ontology	GO:0046943	1	124	0.326416624289	0.569725125124	SLC7A1i1
spermatid differentiation	Gene Ontology	GO:0048515	1	125	0.328542628103	0.57148537419	SMARCA2
Ras guanyl-nucleotide exchange factor activity	Gene Ontology	GO:0005088	1	125	0.328542628103	0.57148537419	PLEKHG3
negative regulation of translation	Gene Ontology	GO:0017148	1	125	0.328542628103	0.57148537419	ZCCHC11
positive regulation of canonical Wnt signaling pathway	Gene Ontology	GO:0090263	1	126	0.330661922791	0.572741018864	USP34
embryonic skeletal system development	Gene Ontology	GO:0048706	1	126	0.330661922791	0.572741018864	HSPG2
cellular response to hypoxia	Gene Ontology	GO:0071456	1	126	0.330661922791	0.572741018864	VLDLR
sterol metabolic process	Gene Ontology	GO:0016125	1	126	0.330661922791	0.572741018864	VLDLR
organic acid transmembrane transporter activity	Gene Ontology	GO:0005342	1	127	0.33277452952	0.574159562742	SLC7A1i1
striated muscle contraction	Gene Ontology	GO:0006941	1	127	0.33277452952	0.574159562742	SMAD5
regulation of mRNA stability	Gene Ontology	GO:0043488	1	127	0.33277452952	0.574159562742	TNPO1
response to mitochondrial depolarisation	Gene Ontology	GO:0098780	1	128	0.334880469395	0.575117774352	PRKG1
mitophagy in response to mitochondrial depolarization	Gene Ontology	GO:0098779	1	128	0.334880469395	0.575117774352	PRKG1
transcription factor activity, RNA polymerase II transcription factor binding	Gene Ontology	GO:0001076	1	128	0.334880469395	0.575117774352	SMARCA2
nephron development	Gene Ontology	GO:0072006	1	129	0.336979763448	0.575974101028	AGT
cellular response to decreased oxygen levels	Gene Ontology	GO:0036294	1	129	0.336979763448	0.575974101028	VLDLR
acute inflammatory response	Gene Ontology	GO:0002526	1	129	0.336979763448	0.575974101028	FN1
lipoprotein metabolic process	Gene Ontology	GO:0042157	1	129	0.336979763448	0.575974101028	HSPG2
regulation of RNA stability	Gene Ontology	GO:0043487	1	130	0.339072432651	0.576851769986	TNPO1
negative regulation of cellular response to growth factor stimulus	Gene Ontology	GO:0090288	1	130	0.339072432651	0.576851769986	AGT
extrinsic component of plasma membrane	Gene Ontology	GO:0019897	1	130	0.339072432651	0.576851769986	BMX
negative regulation of cell-cell adhesion	Gene Ontology	GO:0022408	1	130	0.339072432651	0.576851769986	PRKG1
leading edge membrane	Gene Ontology	GO:0031256	1	131	0.341158497906	0.578476312431	BMX
negative regulation of cellular amide metabolic process	Gene Ontology	GO:0034249	1	131	0.341158497906	0.578476312431	ZCCHC11
multicellular organismal metabolic process	Gene Ontology	GO:0044236	1	131	0.341158497906	0.578476312431	PRTN3
regulation of cytokine secretion	Gene Ontology	GO:0050707	1	131	0.341158497906	0.578476312431	FN1
mammary gland development	Gene Ontology	GO:0030879	1	132	0.34323798005	0.580485154457	ERBB4
BMP signaling pathway	Gene Ontology	GO:0030509	1	133	0.345310899854	0.581660059899	SMAD5
negative regulation of neuron apoptotic process	Gene Ontology	GO:0043524	1	133	0.345310899854	0.581660059899	AGT
UDP-glycosyltransferase activity	Gene Ontology	GO:0008194	1	133	0.345310899854	0.581660059899	UGT8
protein modification by small protein removal	Gene Ontology	GO:0070646	1	135	0.349437135201	0.585524740963	USP34
negative regulation of sequence-specific DNA binding transcription factor activity	Gene Ontology	GO:0043433	1	135	0.349437135201	0.585524740963	ZCCHC11
tissue remodeling	Gene Ontology	GO:0048771	1	136	0.35149049196	0.586658738865	AGT
positive regulation of cell growth	Gene Ontology	GO:0030307	1	136	0.35149049196	0.586658738865	FN1
regulation of synaptic plasticity	Gene Ontology	GO:0048167	1	136	0.35149049196	0.586658738865	AGT
microtubule organizing center part	Gene Ontology	GO:0044450	1	137	0.353537368811	0.587881648611	PCM12
cellular response to oxygen levels	Gene Ontology	GO:0071453	1	137	0.353537368811	0.587881648611	VLDLR
fatty acid biosynthetic process	Gene Ontology	GO:0006633	1	138	0.355577786199	0.590014535569	AGT
neuron projection extension	Gene Ontology	GO:1990138	1	138	0.355577786199	0.590014535569	FN1
microtubule associated complex	Gene Ontology	GO:0005875	1	140	0.359639324052	0.593288872	DYNC1H1
potassium ion transmembrane transporter activity	Gene Ontology	GO:0015079	1	140	0.359639324052	0.593288872	KCNMB2
core promoter binding	Gene Ontology	GO:0001047	1	141	0.361660485085	0.593940822326	SMAD5
amino acid transport	Gene Ontology	GO:0006865	1	141	0.361660485085	0.593940822326	SLC7A1i1
response to BMP	Gene Ontology	GO:0071772	1	141	0.361660485085	0.593940822326	SMAD5
cellular response to BMP stimulus	Gene Ontology	GO:0071773	1	141	0.361660485085	0.593940822326	SMAD5
helicase activity	Gene Ontology	GO:0004386	1	142	0.363675267796	0.59465901005	SMARCA2
gene silencing by RNA	Gene Ontology	GO:0031047	1	142	0.363675267796	0.59465901005	ZCCHC11
sphingolipid metabolic process	Gene Ontology	GO:0006665	1	142	0.363675267796	0.59465901005	UGT8
endothelial cell migration	Gene Ontology	GO:0043542	1	144	0.367685778689	0.597231253366	AGT
histone acetylation	Gene Ontology	GO:0016573	1	144	0.367685778689	0.597231253366	HCFC1
regulation of protein dephosphorylation	Gene Ontology	GO:0035304	1	144	0.367685778689	0.597231253366	LKAP
serine-type endopeptidase activity	Gene Ontology	GO:0004252	1	145	0.369681546932	0.597813619767	PRTN3
chromatin remodeling	Gene Ontology	GO:0006338	1	145	0.369681546932	0.597813619767	SMARCA2
male sex differentiation	Gene Ontology	GO:0046661	1	146	0.371671016973	0.598984836501	SMAD5
hematopoietic progenitor cell differentiation	Gene Ontology	GO:0002244	1	146	0.371671016973	0.598984836501	PTPRZ1
regulation of reactive oxygen species metabolic process	Gene Ontology	GO:2000377	1	146	0.371671016973	0.598984836501	AGT
response to starvation	Gene Ontology	GO:0042594	1	147	0.373654208686	0.59977012656	VLDLR
macromitophagy	Gene Ontology	GO:0000423	1	147	0.373654208686	0.59977012656	PRKG1
multicellular organism growth	Gene Ontology	GO:0035264	1	148	0.37563114188	0.602187354098	AGT
response to ketone	Gene Ontology	GO:1901654	1	148	0.37563114188	0.602187354098	DSG2
positive regulation of cell morphogenesis involved in differentiation	Gene Ontology	GO:0010770	1	149	0.377601836302	0.603832329846	FN1
pallium development	Gene Ontology	GO:0021543	1	149	0.377601836302	0.603832329846	VLDLR
internal peptidyl-lysine acetylation	Gene Ontology	GO:0018393	1	149	0.377601836302	0.603832329846	HCFC1
heparin binding	Gene Ontology	GO:0008201	1	149	0.377601836302	0.603832329846	FN1
regulation of muscle cell differentiation	Gene Ontology	GO:0051147	1	150	0.379566311637	0.60545917583	MBNL3
meiotic nuclear division	Gene Ontology	GO:0007126	1	150	0.379566311637	0.60545917583	LKAP
cellular response to nutrient levels	Gene Ontology	GO:0031669	1	150	0.379566311637	0.60545917583	VLDLR
regulation of dephosphorylation	Gene Ontology	GO:0035303	1	150	0.379566311637	0.60545917583	LKAP
cytoplasmic side of plasma membrane	Gene Ontology	GO:0009898	1	151	0.381524587509	0.606690528769	BMX
positive regulation of peptidase activity	Gene Ontology	GO:0010952	1	151	0.381524587509	0.606690528769	FN1
ruffle	Gene Ontology	GO:0001726	1	152	0.383476683478	0.607904451117	BMX
branching morphogenesis of an epithelial tube	Gene Ontology	GO:0048754	1	152	0.383476683478	0.607904451117	AGT
peptidyl-lysine acetylation	Gene Ontology	GO:0018394	1	153	0.385422619043	0.609477821208	HCFC1
negative regulation of cell activation	Gene Ontology	GO:0050866	1	153	0.385422619043	0.609477821208	PRKG1
positive regulation of response to wounding	Gene Ontology	GO:1903036	1	154	0.387362413643	0.611410920793	AGT
Rho protein signal transduction	Gene Ontology	GO:0007266	1	154	0.387362413643	0.611410920793	PLEKHG3
regulation of epithelial cell migration	Gene Ontology	GO:0010632	1	154	0.387362413643	0.611410920793	AGT
internal protein amino acid acetylation	Gene Ontology	GO:0006475	1	155	0.389296086653	0.613327229558	HCFC1
regulation of extrinsic apoptotic signaling pathway	Gene Ontology	GO:2001236	1	157	0.393145145107	0.616709325352	AGT
regulation of cell size	Gene Ontology	GO:0008361	1	157	0.393145145107	0.616709325352	FN1
positive regulation of Wnt signaling pathway	Gene Ontology	GO:0030177	1	158	0.395060568998	0.616709325352	USP34
regulation of axonogenesis	Gene Ontology	GO:0050770	1	158	0.395060568998	0.616709325352	FN1
negative regulation of response to wounding	Gene Ontology	GO:1903035	1	158	0.395060568998	0.616709325352	PRKG1
growth factor activity	Gene Ontology	GO:0008083	1	158	0.395060568998	0.616709325352	AGT
meiotic cell cycle process	Gene Ontology	GO:1903046	1	158	0.395060568998	0.616709325352	LKAP
negative regulation of neuron death	Gene Ontology	GO:1901215	1	159	0.396969948196	0.617804112926	AGT
regeneration	Gene Ontology	GO:0031099	1	159	0.396969948196	0.617804112926	ERBB4
actin-based cell projection	Gene Ontology	GO:0098858	1	159	0.396969948196	0.617804112926	DYNC1H1
organic anion transmembrane transporter activity	Gene Ontology	GO:0008514	1	160	0.398873301774	0.618687939792	SLC7A1i1
endopeptidase inhibitor activity	Gene Ontology	GO:0004866	1	160	0.398873301774	0.618687939792	AGT
regulation of cell-substrate adhesion	Gene Ontology	GO:0010810	1	162	0.40266200806	0.621367987091	FN1
positive regulation of ERK1 and ERK2 cascade	Gene Ontology	GO:0070374	1	162	0.40266200806	0.621367987091	ERBB4
glycosaminoglycan metabolic process	Gene Ontology	GO:0030203	1	162	0.40266200806	0.621367987091	HSPG2
mesenchymal cell development	Gene Ontology	GO:0014031	1	162	0.40266200806	0.621367987091	ERBB4
regulation of organ morphogenesis	Gene Ontology	GO:2000027	1	162	0.40266200806	0.621367987091	AGT
phosphoprotein phosphatase activity	Gene Ontology	GO:0004721	1	163	0.404547398614	0.623900903652	PTPRZ1
positive regulation of homeostatic process	Gene Ontology	GO:0032846	1	164	0.406426839238	0.624914869472	AGT
central nervous system neuron differentiation	Gene Ontology	GO:0021953	1	164	0.406426839238	0.624914869472	ERBB4
cytoplasmic side of membrane	Gene Ontology	GO:0098562	1	164	0.406426839238	0.624914869472	BMX
stem cell development	Gene Ontology	GO:0048864	1	165	0.408300348707	0.625316357926	ERBB4
endopeptidase regulator activity	Gene Ontology	GO:0061135	1	165	0.408300348707	0.625316357926	AGT
cation channel complex	Gene Ontology	GO:0034703	1	165	0.408300348707	0.625316357926	KCNMB2
regulation of protein import into nucleus	Gene Ontology	GO:0042306	1	166	0.410167945736	0.626522961318	ERBB4
response to nutrient	Gene Ontology	GO:0007584	1	167	0.412029648979	0.627996176389	VLDLR
peptidase inhibitor activity	Gene Ontology	GO:0030414	1	168	0.413885477034	0.629089710669	AGT
regulation of protein import	Gene Ontology	GO:1904589	1	169	0.415735448439	0.630130823564	ERBB4
serine-type peptidase activity	Gene Ontology	GO:0008236	1	169	0.415735448439	0.630130823564	PRTN3
aminoglycan metabolic process	Gene Ontology	GO:0006022	1	169	0.415735448439	0.630130823564	HSPG2
G-protein coupled receptor signaling pathway, coupled to cyclic nucleotide second messenger	Gene Ontology	GO:0007187	1	170	0.417579581672	0.630130823564	AGT
potassium ion transmembrane transport	Gene Ontology	GO:0071805	1	170	0.417579581672	0.630130823564	KCNMB2
negative regulation of secretion by cell	Gene Ontology	GO:1903531	1	170	0.417579581672	0.630130823564	FN1
cellular potassium ion transport	Gene Ontology	GO:0071804	1	170	0.417579581672	0.630130823564	KCNMB2
cysteine-type peptidase activity	Gene Ontology	GO:0008234	1	171	0.419417895155	0.631596912787	USP34
regulation of ion homeostasis	Gene Ontology	GO:2000021	1	172	0.421250407252	0.632302181429	AGT
serine hydrolase activity	Gene Ontology	GO:0017171	1	172	0.421250407252	0.632302181429	PRTN3
regulation of ossification	Gene Ontology	GO:0030278	1	172	0.421250407252	0.632302181429	SMAD5
protein C-terminus binding	Gene Ontology	GO:0008022	1	172	0.421250407252	0.632302181429	HSPG2
histone binding	Gene Ontology	GO:0042393	1	173	0.423077136267	0.633377188194	SMARCA2
carbohydrate derivative catabolic process	Gene Ontology	GO:1901136	1	173	0.423077136267	0.633377188194	HSPG2
gastrulation	Gene Ontology	GO:0007369	1	174	0.424898100448	0.635359323301	FN1
mesenchymal cell differentiation	Gene Ontology	GO:0048762	1	175	0.426713317984	0.637700732955	ERBB4
metallopeptidase activity	Gene Ontology	GO:0008237	1	176	0.428522807009	0.63779558645	LNPEP
lipid modification	Gene Ontology	GO:0030258	1	177	0.430326585597	0.639363788129	AGT
cellular response to extracellular stimulus	Gene Ontology	GO:0031668	1	177	0.430326585597	0.639363788129	VLDLR
inner ear development	Gene Ontology	GO:0048839	1	177	0.430326585597	0.639363788129	FREM2
protein acetylation	Gene Ontology	GO:0006473	1	178	0.432124671766	0.640499935868	HCFC1
sarcomere	Gene Ontology	GO:0030017	1	179	0.433917083478	0.641344498528	FLNC
detection of external stimulus	Gene Ontology	GO:0009581	1	180	0.435703838638	0.642870580149	HSPG2
detection of abiotic stimulus	Gene Ontology	GO:0009582	1	183	0.441030343005	0.647110161956	HSPG2
regulation of cellular ketone metabolic process	Gene Ontology	GO:0010565	1	183	0.441030343005	0.647110161956	AGT
regulation of endocytosis	Gene Ontology	GO:0030100	1	184	0.442794649876	0.648097263727	PRTN3
cilium assembly	Gene Ontology	GO:0042384	1	184	0.442794649876	0.648097263727	PCM12
regulation of Ras protein signal transduction	Gene Ontology	GO:0046578	1	185	0.444553388874	0.648814506478	PLEKHG3
phosphatidylinositol binding	Gene Ontology	GO:0035091	1	185	0.444553388874	0.648814506478	SNX13
morphogenesis of a branching epithelium	Gene Ontology	GO:0061138	1	185	0.444553388874	0.648814506478	AGT
myeloid leukocyte differentiation	Gene Ontology	GO:0002573	1	185	0.444553388874	0.648814506478	PRTN3
calcium ion transmembrane transport	Gene Ontology	GO:0070588	1	186	0.446306577568	0.650630512452	AHNAK
positive regulation of apoptotic signaling pathway	Gene Ontology	GO:2001235	1	186	0.446306577568	0.650630512452	AGT
membrane lipid metabolic process	Gene Ontology	GO:0006643	1	187	0.448054233471	0.651963035922	UGT8
regulation of protein localization to nucleus	Gene Ontology	GO:1900180	1	188	0.44979637404	0.653111486894	ERBB4
hormone metabolic process	Gene Ontology	GO:0042445	1	189	0.451533016679	0.654889349773	AGT
regulation of neuron apoptotic process	Gene Ontology	GO:0043523	1	189	0.451533016679	0.654889349773	AGT
transforming growth factor beta receptor signaling pathway	Gene Ontology	GO:0007179	1	190	0.453264178736	0.657027497181	SMAD5
response to mechanical stimulus	Gene Ontology	GO:0009612	1	191	0.454989877503	0.658571803831	AGT
negative regulation of cell migration	Gene Ontology	GO:0030336	1	192	0.456710130218	0.659778419756	ERBB4
meiotic cell cycle	Gene Ontology	GO:0051321	1	192	0.456710130218	0.659778419756	LKAP
negative regulation of protein transport	Gene Ontology	GO:0051224	1	193	0.458424954067	0.661135142442	FN1
glycosaminoglycan binding	Gene Ontology	GO:0005539	1	194	0.460134366178	0.662106682227	FN1
negative regulation of secretion	Gene Ontology	GO:0051048	1	194	0.460134366178	0.662106682227	FN1
regulation of angiogenesis	Gene Ontology	GO:0045765	1	194	0.460134366178	0.662106682227	AGT
guanyl-nucleotide exchange factor activity	Gene Ontology	GO:0005085	1	195	0.461838383629	0.662407737064	PLEKHG3
osteoblast differentiation	Gene Ontology	GO:0001649	1	196	0.46353702344	0.66401354002	SMAD5
transferase activity, transferring hexosyl groups	Gene Ontology	GO:0016758	1	197	0.46523030258	0.664949068584	UGT8
regulation of protein stability	Gene Ontology	GO:0031647	1	197	0.46523030258	0.664949068584	HCFC1
phagocytosis	Gene Ontology	GO:0006909	1	197	0.46523030258	0.664949068584	PRTN3
transferase activity, transferring acyl groups other than amino-acyl groups	Gene Ontology	GO:0016747	1	198	0.466918237964	0.665326678738	HCFC1
monocarboxylic acid biosynthetic process	Gene Ontology	GO:0072330	1	198	0.466918237964	0.665326678738	AGT
primary cilium	Gene Ontology	GO:0072372	1	199	0.468600846454	0.666150377176	TNPO1
ear development	Gene Ontology	GO:0043583	1	199	0.468600846454	0.666150377176	FREM2
morphogenesis of a branching structure	Gene Ontology	GO:0001763	1	199	0.468600846454	0.666150377176	AGT
sodium ion transport	Gene Ontology	GO:0006814	1	200	0.470278144857	0.66737432121	AGT
regulation of nucleocytoplasmic transport	Gene Ontology	GO:0046822	1	201	0.471950149929	0.667625128955	ERBB4
postsynaptic membrane	Gene Ontology	GO:0045211	1	201	0.471950149929	0.667625128955	KCTD12
gonad development	Gene Ontology	GO:0008406	1	203	0.475278346835	0.669579467139	AGT
developmental growth involved in morphogenesis	Gene Ontology	GO:0060560	1	203	0.475278346835	0.669579467139	FN1
negative regulation of cell motility	Gene Ontology	GO:2000146	1	203	0.475278346835	0.669579467139	ERBB4
T cell differentiation	Gene Ontology	GO:0030217	1	203	0.475278346835	0.669579467139	BMX
mitophagy	Gene Ontology	GO:0000422	1	204	0.476934571916	0.670435239357	PRKG1
potassium ion transport	Gene Ontology	GO:0006813	1	204	0.476934571916	0.670435239357	KCNMB2
mitochondrion disassembly	Gene Ontology	GO:0061726	1	204	0.476934571916	0.670435239357	PRKG1
basolateral plasma membrane	Gene Ontology	GO:0016323	1	204	0.476934571916	0.670435239357	ERBB4
cilium organization	Gene Ontology	GO:0044782	1	205	0.47858557016	0.67201718995	PCM12
epithelial cell migration	Gene Ontology	GO:0010631	1	205	0.47858557016	0.67201718995	AGT
skeletal system morphogenesis	Gene Ontology	GO:0048705	1	206	0.480231358059	0.673219069384	HSPG2
epithelium migration	Gene Ontology	GO:0090132	1	207	0.481871952053	0.674409732567	AGT
negative regulation of cytokine production	Gene Ontology	GO:0001818	1	207	0.481871952053	0.674409732567	FN1
protein acylation	Gene Ontology	GO:0043543	1	208	0.483507368532	0.675220284728	HCFC1
development of primary sexual characteristics	Gene Ontology	GO:0045137	1	208	0.483507368532	0.675220284728	AGT
neuron apoptotic process	Gene Ontology	GO:0051402	1	209	0.485137623832	0.676757721843	AGT
negative regulation of cell adhesion	Gene Ontology	GO:0007162	1	209	0.485137623832	0.676757721843	PRKG1
protein polyubiquitination	Gene Ontology	GO:0000209	1	210	0.486762734239	0.678099695565	LNPEP
epithelial cell development	Gene Ontology	GO:0002064	1	210	0.486762734239	0.678099695565	AGT
response to temperature stimulus	Gene Ontology	GO:0009266	1	211	0.488382715986	0.679213562173	AGT
regulation of vasculature development	Gene Ontology	GO:1901342	1	213	0.491607358183	0.680953420842	AGT
tissue migration	Gene Ontology	GO:0090130	1	213	0.491607358183	0.680953420842	AGT
homeostasis of number of cells	Gene Ontology	GO:0048872	1	216	0.496406259448	0.683481501367	SMAD5
Ras GTPase binding	Gene Ontology	GO:0017016	1	217	0.497995807297	0.683481501367	TNPO1
secondary active transmembrane transporter activity	Gene Ontology	GO:0015291	1	218	0.4995803387	0.683481501367	SLC7A1i1
double-strand break repair	Gene Ontology	GO:0006302	1	218	0.4995803387	0.683481501367	LKAP
organic hydroxy compound transport	Gene Ontology	GO:0015850	1	218	0.4995803387	0.683481501367	AGT
cilium morphogenesis	Gene Ontology	GO:0060271	1	218	0.4995803387	0.683481501367	PCM12
regulation of synapse structure or activity	Gene Ontology	GO:0050803	1	219	0.501159869485	0.68490955974	AGT
positive regulation of sequence-specific DNA binding transcription factor activity	Gene Ontology	GO:0051091	1	220	0.502734415432	0.686411893029	AGT
organelle disassembly	Gene Ontology	GO:1903008	1	221	0.50430399227	0.686470329295	PRKG1
regulation of response to biotic stimulus	Gene Ontology	GO:0002831	1	223	0.507428301286	0.688309884019	ZCCHC11
sulfur compound binding	Gene Ontology	GO:1901681	1	224	0.508983064674	0.688309884019	FN1
anion transmembrane transport	Gene Ontology	GO:0098656	1	224	0.508983064674	0.688309884019	SLC7A1i1
activation of MAPKK activity	Gene Ontology	GO:0000186	1	225	0.510532921375	0.688519345968	ERBB4
cellular response to transforming growth factor beta stimulus	Gene Ontology	GO:0071560	1	225	0.510532921375	0.688519345968	SMAD5
regulation of canonical Wnt signaling pathway	Gene Ontology	GO:0060828	1	225	0.510532921375	0.688519345968	USP34
ribosome biogenesis	Gene Ontology	GO:0042254	1	227	0.513617976595	0.690494829733	RPS27
mesenchyme development	Gene Ontology	GO:0060485	1	227	0.513617976595	0.690494829733	ERBB4
response to transforming growth factor beta	Gene Ontology	GO:0071559	1	228	0.515153205932	0.691105324013	SMAD5
reactive oxygen species metabolic process	Gene Ontology	GO:0072593	1	230	0.518209144745	0.693749101106	AGT
extrinsic apoptotic signaling pathway	Gene Ontology	GO:0097191	1	231	0.519729884748	0.694693839676	AGT
negative regulation of cellular component movement	Gene Ontology	GO:0051271	1	231	0.519729884748	0.694693839676	ERBB4
intermediate filament cytoskeleton	Gene Ontology	GO:0045111	1	233	0.522756981906	0.695887094764	SMARCA2
negative regulation of endopeptidase activity	Gene Ontology	GO:0010951	1	234	0.524263369302	0.695887094764	AGT
regulation of cellular response to growth factor stimulus	Gene Ontology	GO:0090287	1	234	0.524263369302	0.695887094764	AGT
regulation of neuron death	Gene Ontology	GO:1901214	1	234	0.524263369302	0.695887094764	AGT
transferase activity, transferring acyl groups	Gene Ontology	GO:0016746	1	234	0.524263369302	0.695887094764	HCFC1
gene silencing	Gene Ontology	GO:0016458	1	234	0.524263369302	0.695887094764	ZCCHC11
small GTPase binding	Gene Ontology	GO:0031267	1	235	0.525765002655	0.695887094764	TNPO1
peptidyl-serine phosphorylation	Gene Ontology	GO:0018105	1	235	0.525765002655	0.695887094764	AGT
extrinsic component of membrane	Gene Ontology	GO:0019898	1	240	0.533202382168	0.701697628	BMX
negative regulation of peptidase activity	Gene Ontology	GO:0010466	1	244	0.539068230543	0.705784672555	AGT
receptor-mediated endocytosis	Gene Ontology	GO:0006898	1	246	0.541973459381	0.708217582381	VLDLR
positive regulation of cytoplasmic transport	Gene Ontology	GO:1903651	1	247	0.543419200872	0.708217582381	ERBB4
cellular ketone metabolic process	Gene Ontology	GO:0042180	1	247	0.543419200872	0.708217582381	AGT
G-protein coupled receptor binding	Gene Ontology	GO:0001664	1	247	0.543419200872	0.708217582381	AGT
peptidyl-serine modification	Gene Ontology	GO:0018209	1	249	0.546297010216	0.711605427979	AGT
synaptic membrane	Gene Ontology	GO:0097060	1	250	0.547729106817	0.712744695233	KCTD12
aging	Gene Ontology	GO:0007568	1	250	0.547729106817	0.712744695233	AGT
negative regulation of locomotion	Gene Ontology	GO:0040013	1	251	0.549156683795	0.713437588014	ERBB4
phosphatase activity	Gene Ontology	GO:0016791	1	251	0.549156683795	0.713437588014	PTPRZ1
ubiquitin protein ligase binding	Gene Ontology	GO:0031625	1	251	0.549156683795	0.713437588014	SMAD5
I-kappaB kinase/NF-kappaB signaling	Gene Ontology	GO:0007249	1	252	0.550579755411	0.714186768685	IRAK1BP1
protein homooligomerization	Gene Ontology	GO:0051260	1	254	0.553412439376	0.716856944015	KCTD12
ubiquitin-like protein ligase binding	Gene Ontology	GO:0044389	1	255	0.554822080025	0.717592341236	SMAD5
stress-activated MAPK cascade	Gene Ontology	GO:0051403	1	255	0.554822080025	0.717592341236	AGT
GTPase binding	Gene Ontology	GO:0051020	1	256	0.556227271908	0.718319764782	TNPO1
stem cell differentiation	Gene Ontology	GO:0048863	1	256	0.556227271908	0.718319764782	ERBB4
modulation of synaptic transmission	Gene Ontology	GO:0050804	1	256	0.556227271908	0.718319764782	AGT
anion transmembrane transporter activity	Gene Ontology	GO:0008509	1	263	0.565940223283	0.725367995456	SLC7A1i1
membrane raft	Gene Ontology	GO:0045121	1	264	0.567310326705	0.726395846461	AHNAK
membrane microdomain	Gene Ontology	GO:0098857	1	265	0.568676106119	0.726689057144	AHNAK
neuron death	Gene Ontology	GO:0070997	1	265	0.568676106119	0.726689057144	AGT
cellular response to abiotic stimulus	Gene Ontology	GO:0071214	1	265	0.568676106119	0.726689057144	AGT
carbohydrate binding	Gene Ontology	GO:0030246	1	266	0.57003757517	0.727701487623	CRYBG3
positive regulation of response to external stimulus	Gene Ontology	GO:0032103	1	266	0.57003757517	0.727701487623	AGT
negative regulation of response to external stimulus	Gene Ontology	GO:0032102	1	267	0.571394747459	0.728013758768	PRKG1
transferase activity, transferring glycosyl groups	Gene Ontology	GO:0016757	1	267	0.571394747459	0.728013758768	UGT8
canonical Wnt signaling pathway	Gene Ontology	GO:0060070	1	272	0.57811663052	0.73325606361	USP34
ion channel complex	Gene Ontology	GO:0034702	1	273	0.579448305468	0.7345807224	KCNMB2
response to hypoxia	Gene Ontology	GO:0001666	1	274	0.580775777669	0.735898743062	VLDLR
regulation of inflammatory response	Gene Ontology	GO:0050727	1	276	0.583418166831	0.737882511025	AGT
regulation of small GTPase mediated signal transduction	Gene Ontology	GO:0051056	1	278	0.5860439036	0.739465968641	PLEKHG3
stress-activated protein kinase signaling cascade	Gene Ontology	GO:0031098	1	279	0.587350560152	0.739465968641	AGT
response to decreased oxygen levels	Gene Ontology	GO:0036293	1	279	0.587350560152	0.739465968641	VLDLR
vascular endothelial growth factor receptor signaling pathway	Gene Ontology	GO:0048010	1	279	0.587350560152	0.739465968641	ERBB4
embryonic organ morphogenesis	Gene Ontology	GO:0048562	1	279	0.587350560152	0.739465968641	HSPG2
cell projection membrane	Gene Ontology	GO:0031253	1	282	0.591245839001	0.742542048294	BMX
positive regulation of protein serine/threonine kinase activity	Gene Ontology	GO:0071902	1	282	0.591245839001	0.742542048294	AGT
Fc-epsilon receptor signaling pathway	Gene Ontology	GO:0038095	1	282	0.591245839001	0.742542048294	ERBB4
nuclear chromatin	Gene Ontology	GO:0000790	1	283	0.592536078254	0.743044812334	SMARCA2
regulation of protein targeting	Gene Ontology	GO:1903533	1	285	0.595104353613	0.744601374217	ERBB4
carboxylic acid transport	Gene Ontology	GO:0046942	1	286	0.596382415378	0.745332275719	SLC7A1i1
regulation of homotypic cell-cell adhesion	Gene Ontology	GO:0034110	1	287	0.59765644357	0.746125320831	PRKG1
regulation of gene expression, epigenetic	Gene Ontology	GO:0040029	1	287	0.59765644357	0.746125320831	ZCCHC11
organic acid biosynthetic process	Gene Ontology	GO:0016053	1	289	0.600192450109	0.74613735358	AGT
carboxylic acid biosynthetic process	Gene Ontology	GO:0046394	1	289	0.600192450109	0.74613735358	AGT
coenzyme metabolic process	Gene Ontology	GO:0006732	1	289	0.600192450109	0.74613735358	FAR2
organic acid transport	Gene Ontology	GO:0015849	1	289	0.600192450109	0.74613735358	SLC7A1i1
regulation of Wnt signaling pathway	Gene Ontology	GO:0030111	1	290	0.601454453792	0.746200406766	USP34
cation channel activity	Gene Ontology	GO:0005261	1	290	0.601454453792	0.746200406766	KCNMB2
transcription factor complex	Gene Ontology	GO:0005667	1	293	0.605216617665	0.746939786884	SMAD5
hormone secretion	Gene Ontology	GO:0046879	1	297	0.610177659381	0.747384976092	AGT
monosaccharide metabolic process	Gene Ontology	GO:0005996	1	298	0.611408149548	0.747384976092	UGT8
response to metal ion	Gene Ontology	GO:0010038	1	298	0.611408149548	0.747384976092	KCNMB2
ATPase activity, coupled	Gene Ontology	GO:0042623	1	299	0.612634756255	0.747384976092	SMARCA2
response to oxygen levels	Gene Ontology	GO:0070482	1	299	0.612634756255	0.747384976092	VLDLR
lymphocyte differentiation	Gene Ontology	GO:0030098	1	300	0.613857491757	0.748157105063	BMX
ciliary part	Gene Ontology	GO:0044441	1	301	0.615076368268	0.748625702899	PCM12
fibroblast growth factor receptor signaling pathway	Gene Ontology	GO:0008543	1	301	0.615076368268	0.748625702899	ERBB4
positive regulation of cell cycle	Gene Ontology	GO:0045787	1	302	0.616291397967	0.748625702899	HCFC1
positive regulation of secretion by cell	Gene Ontology	GO:1903532	1	302	0.616291397967	0.748625702899	AGT
regulation of translation	Gene Ontology	GO:0006417	1	305	0.619913527381	0.751597387156	ZCCHC11
hormone transport	Gene Ontology	GO:0009914	1	306	0.621113290832	0.752695111212	AGT
transmembrane transporter complex	Gene Ontology	GO:1902495	1	308	0.623501470179	0.753519415261	KCNMB2
protein processing	Gene Ontology	GO:0016485	1	308	0.623501470179	0.753519415261	AGT
regulation of actin filament-based process	Gene Ontology	GO:0032970	1	310	0.62587459892	0.755011282433	DSG2
ncRNA processing	Gene Ontology	GO:0034470	1	312	0.62823277189	0.755237986705	ZCCHC11
secretory granule	Gene Ontology	GO:0030141	1	312	0.62823277189	0.755237986705	FN1
transcriptional activator activity, RNA polymerase II transcription regulatory region sequence-specific binding	Gene Ontology	GO:0001228	1	312	0.62823277189	0.755237986705	HCFC1
regulation of cell morphogenesis involved in differentiation	Gene Ontology	GO:0010769	1	313	0.629406279433	0.755937931663	FN1
transporter complex	Gene Ontology	GO:1990351	1	314	0.630576083327	0.756632118755	KCNMB2
regulation of cellular component size	Gene Ontology	GO:0032535	1	315	0.631742195257	0.756993256559	FN1
rhythmic process	Gene Ontology	GO:0048511	1	317	0.634063389793	0.758588485852	AGT
epithelial tube morphogenesis	Gene Ontology	GO:0060562	1	318	0.635218495589	0.758588485852	AGT
gated channel activity	Gene Ontology	GO:0022836	1	319	0.636369955802	0.758600455471	KCNMB2
cellular response to fibroblast growth factor stimulus	Gene Ontology	GO:0044344	1	320	0.637517781936	0.759614617153	ERBB4
insulin receptor signaling pathway	Gene Ontology	GO:0008286	1	321	0.638661985459	0.760204924072	ERBB4
phospholipid binding	Gene Ontology	GO:0005543	1	323	0.640939570361	0.76050231156	SNX13
response to fibroblast growth factor	Gene Ontology	GO:0071774	1	325	0.643202801526	0.761773767254	ERBB4
establishment of organelle localization	Gene Ontology	GO:0051656	1	327	0.645451769399	0.763345865662	DYNC1H1
protein maturation	Gene Ontology	GO:0051604	1	331	0.649907274203	0.765812396376	AGT
regulation of cellular amide metabolic process	Gene Ontology	GO:0034248	1	332	0.651012375592	0.766761236475	ZCCHC11
positive regulation of secretion	Gene Ontology	GO:0051047	1	333	0.65211398919	0.767351804123	AGT
macroautophagy	Gene Ontology	GO:0016236	1	334	0.653212126003	0.76829043523	PRKG1
regulation of protein complex assembly	Gene Ontology	GO:0043254	1	335	0.654306797003	0.769224128706	HCFC1
cell leading edge	Gene Ontology	GO:0031252	1	336	0.655398013125	0.769595685276	BMX
active transmembrane transporter activity	Gene Ontology	GO:0022804	1	337	0.656485785273	0.769595685276	SLC7A1i1
Fc receptor signaling pathway	Gene Ontology	GO:0038093	1	337	0.656485785273	0.769595685276	ERBB4
leukocyte migration	Gene Ontology	GO:0050900	1	339	0.658651041081	0.770434909443	FN1
phosphoric ester hydrolase activity	Gene Ontology	GO:0042578	1	340	0.659728546373	0.77134242939	PTPRZ1
muscle organ development	Gene Ontology	GO:0007517	1	341	0.660802650956	0.771539898856	ERBB4
positive regulation of proteolysis	Gene Ontology	GO:0045862	1	344	0.664004667593	0.773512498877	FN1
response to light stimulus	Gene Ontology	GO:0009416	1	344	0.664004667593	0.773512498877	HSPG2
negative regulation of proteolysis	Gene Ontology	GO:0045861	1	344	0.664004667593	0.773512498877	AGT
cofactor metabolic process	Gene Ontology	GO:0051186	1	345	0.665065276313	0.77439522383	FAR2
fatty acid metabolic process	Gene Ontology	GO:0006631	1	347	0.667176462144	0.775441006228	AGT
cell projection assembly	Gene Ontology	GO:0030031	1	349	0.669274342749	0.776820015619	PCM12
postsynapse	Gene Ontology	GO:0098794	1	349	0.669274342749	0.776820015619	KCTD12
phospholipid metabolic process	Gene Ontology	GO:0006644	1	350	0.670318319813	0.777237349133	ERBB4
monovalent inorganic cation transmembrane transporter activity	Gene Ontology	GO:0015077	1	351	0.671359001968	0.777237349133	KCNMB2
positive regulation of cell adhesion	Gene Ontology	GO:0045785	1	352	0.672396399613	0.777971761905	FN1
axon	Gene Ontology	GO:0030424	1	357	0.677534481797	0.781893757043	HCFC1
tube morphogenesis	Gene Ontology	GO:0035239	1	358	0.678552388894	0.781910075891	AGT
peptidyl-lysine modification	Gene Ontology	GO:0018205	1	360	0.680578575302	0.783186056277	HCFC1
regulation of endopeptidase activity	Gene Ontology	GO:0052548	1	361	0.681586874856	0.783993539814	AGT
regulation of cell-cell adhesion	Gene Ontology	GO:0022407	1	362	0.682591992086	0.784443920792	PRKG1
enzyme inhibitor activity	Gene Ontology	GO:0004857	1	363	0.683593937034	0.784537565977	AGT
endosome membrane	Gene Ontology	GO:0010008	1	363	0.683593937034	0.784537565977	SNX13
exocytosis	Gene Ontology	GO:0006887	1	364	0.684592719711	0.784979185786	FN1
regulation of vesicle-mediated transport	Gene Ontology	GO:0060627	1	367	0.687570193748	0.787334073181	PRTN3
positive regulation of cellular component biogenesis	Gene Ontology	GO:0044089	1	374	0.694408801427	0.792719533584	AGT
regulation of protein secretion	Gene Ontology	GO:0050708	1	375	0.695373450852	0.792719533584	FN1
alcohol metabolic process	Gene Ontology	GO:0006066	1	375	0.695373450852	0.792719533584	VLDLR
microtubule	Gene Ontology	GO:0005874	1	375	0.695373450852	0.792719533584	DYNC1H1
neuronal cell body	Gene Ontology	GO:0043025	1	378	0.698249170047	0.79411599712	HCFC1
regulation of apoptotic signaling pathway	Gene Ontology	GO:2001233	1	378	0.698249170047	0.79411599712	AGT
guanyl ribonucleotide binding	Gene Ontology	GO:0032561	1	379	0.699201698676	0.79411599712	PRKG1
guanyl nucleotide binding	Gene Ontology	GO:0019001	1	380	0.700151220973	0.79411599712	PRKG1
actin binding	Gene Ontology	GO:0003779	1	380	0.700151220973	0.79411599712	FLNC
mitochondrial matrix	Gene Ontology	GO:0005759	1	380	0.700151220973	0.79411599712	ERBB4
regulation of homeostatic process	Gene Ontology	GO:0032844	1	386	0.70578575097	0.79712639807	AGT
response to drug	Gene Ontology	GO:0042493	1	390	0.709483168089	0.800595084203	VLDLR
Wnt signaling pathway	Gene Ontology	GO:0016055	1	395	0.71403967609	0.804271561127	USP34
ion channel activity	Gene Ontology	GO:0005216	1	397	0.715842209193	0.804575177541	KCNMB2
metal ion transmembrane transporter activity	Gene Ontology	GO:0046873	1	397	0.715842209193	0.804575177541	KCNMB2
dendrite	Gene Ontology	GO:0030425	1	398	0.716739211143	0.805023382786	HCFC1
organic anion transport	Gene Ontology	GO:0015711	1	401	0.719413266052	0.806657494284	SLC7A1i1
response to steroid hormone	Gene Ontology	GO:0048545	1	401	0.719413266052	0.806657494284	DSG2
reproductive structure development	Gene Ontology	GO:0048608	1	406	0.723814053769	0.809276024836	AGT
substrate-specific channel activity	Gene Ontology	GO:0022838	1	408	0.725554984551	0.810504192004	KCNMB2
side of membrane	Gene Ontology	GO:0098552	1	409	0.726421331062	0.81111761726	BMX
reproductive system development	Gene Ontology	GO:0061458	1	410	0.727284943203	0.811373298329	AGT
signal release	Gene Ontology	GO:0023061	1	410	0.727284943203	0.811373298329	AGT
cytoplasmic vesicle membrane	Gene Ontology	GO:0030659	1	413	0.729859459564	0.812473068396	LNPEP
gland development	Gene Ontology	GO:0048732	1	413	0.729859459564	0.812473068396	ERBB4
positive regulation of defense response	Gene Ontology	GO:0031349	1	417	0.733254387254	0.814479351959	AGT
embryonic organ development	Gene Ontology	GO:0048568	1	417	0.733254387254	0.814479351959	HSPG2
cell-type specific apoptotic process	Gene Ontology	GO:0097285	1	418	0.734096432803	0.814621492497	AGT
regulation of cytoplasmic transport	Gene Ontology	GO:1903649	1	420	0.735772559238	0.815151834476	ERBB4
T cell activation	Gene Ontology	GO:0042110	1	422	0.737438121904	0.815583597625	BMX
regulation of protein serine/threonine kinase activity	Gene Ontology	GO:0071900	1	422	0.737438121904	0.815583597625	AGT
T cell aggregation	Gene Ontology	GO:0070489	1	422	0.737438121904	0.815583597625	BMX
lymphocyte aggregation	Gene Ontology	GO:0071593	1	423	0.738266962643	0.816147264798	BMX
protein serine/threonine kinase activity	Gene Ontology	GO:0004674	1	427	0.741556247899	0.819075302755	PRKG1
cell body	Gene Ontology	GO:0044297	1	429	0.743185358847	0.819949569773	HCFC1
chromatin	Gene Ontology	GO:0000785	1	429	0.743185358847	0.819949569773	SMARCA2
leukocyte aggregation	Gene Ontology	GO:0070486	1	430	0.743996059955	0.819999105734	BMX
vesicle membrane	Gene Ontology	GO:0012506	1	430	0.743996059955	0.819999105734	LNPEP
channel activity	Gene Ontology	GO:0015267	1	438	0.750390228224	0.824558579101	KCNMB2
passive transmembrane transporter activity	Gene Ontology	GO:0022803	1	438	0.750390228224	0.824558579101	KCNMB2
actin cytoskeleton	Gene Ontology	GO:0015629	1	440	0.751963662721	0.825577967187	AHNAK
mRNA processing	Gene Ontology	GO:0006397	1	440	0.751963662721	0.825577967187	MBNL3
nuclear chromosome part	Gene Ontology	GO:0044454	1	443	0.75430524028	0.826728889583	SMARCA2
response to inorganic substance	Gene Ontology	GO:0010035	1	444	0.755080844238	0.827224386768	KCNMB2
cellular protein complex assembly	Gene Ontology	GO:0043623	1	445	0.755854000184	0.827696510993	TNPO1
regulation of cell activation	Gene Ontology	GO:0050865	1	447	0.757392998919	0.828337852111	PRKG1
response to nutrient levels	Gene Ontology	GO:0031667	1	453	0.761952041285	0.831500812614	VLDLR
detection of chemical stimulus	Gene Ontology	GO:0009593	1	454	0.76270350986	0.831500812614	KCNMB2
ncRNA metabolic process	Gene Ontology	GO:0034660	1	456	0.764199338958	0.831500812614	ZCCHC11
leukocyte cell-cell adhesion	Gene Ontology	GO:0007159	1	458	0.765685740434	0.832422805396	BMX
regulation of multi-organism process	Gene Ontology	GO:0043900	1	459	0.766425424395	0.832872847504	ZCCHC11
cellular metal ion homeostasis	Gene Ontology	GO:0006875	1	460	0.767162773698	0.83331997126	AGT
glycoprotein metabolic process	Gene Ontology	GO:0009100	1	461	0.767897795714	0.833764188382	HSPG2
spermatogenesis	Gene Ontology	GO:0007283	1	467	0.772259464412	0.837433185115	SMARCA2
male gamete generation	Gene Ontology	GO:0048232	1	468	0.772978399758	0.837612265617	SMARCA2
autophagy	Gene Ontology	GO:0006914	1	469	0.773695065925	0.837923881224	PRKG1
regulation of hormone levels	Gene Ontology	GO:0010817	1	470	0.774409470075	0.838342512694	AGT
immune response-regulating cell surface receptor signaling pathway	Gene Ontology	GO:0002768	1	474	0.777244608936	0.839684486796	ERBB4
response to radiation	Gene Ontology	GO:0009314	1	475	0.777947809628	0.839684486796	HSPG2
nuclear chromosome	Gene Ontology	GO:0000228	1	476	0.778648790797	0.840086480197	SMARCA2
regulation of cell morphogenesis	Gene Ontology	GO:0022604	1	478	0.780044122562	0.840527948332	FN1
response to extracellular stimulus	Gene Ontology	GO:0009991	1	481	0.78212064818	0.842055788378	VLDLR
plasma membrane protein complex	Gene Ontology	GO:0098797	1	487	0.786215082685	0.844685700179	KCNMB2
DNA repair	Gene Ontology	GO:0006281	1	488	0.78688996965	0.845055712891	LKAP
sensory organ development	Gene Ontology	GO:0007423	1	497	0.792868896931	0.850761967877	FREM2
cellular cation homeostasis	Gene Ontology	GO:0030003	1	499	0.794174603522	0.851163745033	AGT
inorganic cation transmembrane transporter activity	Gene Ontology	GO:0022890	1	501	0.795472080577	0.851768052779	KCNMB2
nuclear division	Gene Ontology	GO:0000280	1	506	0.798680108523	0.85374383901	LKAP
cellular ion homeostasis	Gene Ontology	GO:0006873	1	512	0.802463402569	0.856027918385	AGT
negative regulation of phosphate metabolic process	Gene Ontology	GO:0045936	1	522	0.808611584347	0.860074800822	LKAP
negative regulation of phosphorus metabolic process	Gene Ontology	GO:0010563	1	522	0.808611584347	0.860074800822	LKAP
small molecule biosynthetic process	Gene Ontology	GO:0044283	1	526	0.811016947809	0.861558095367	AGT
metal ion homeostasis	Gene Ontology	GO:0055065	1	527	0.811613551	0.861833824713	AGT
actin cytoskeleton organization	Gene Ontology	GO:0030036	1	529	0.812801113971	0.862378609304	PRKG1
synapse part	Gene Ontology	GO:0044456	1	529	0.812801113971	0.862378609304	KCTD12
organic hydroxy compound metabolic process	Gene Ontology	GO:1901615	1	533	0.815153832013	0.863799564218	VLDLR
ubiquitin-dependent protein catabolic process	Gene Ontology	GO:0006511	1	539	0.818627592421	0.866044995375	USP34
modification-dependent protein catabolic process	Gene Ontology	GO:0019941	1	547	0.823157953051	0.869040002457	USP34
positive regulation of apoptotic process	Gene Ontology	GO:0043065	1	548	0.823716234182	0.869270495586	AGT
axon guidance	Gene Ontology	GO:0007411	1	553	0.826481318142	0.870034059485	ERBB4
RNA polymerase II regulatory region sequence-specific DNA binding	Gene Ontology	GO:0000977	1	553	0.826481318142	0.870034059485	SMAD5
positive regulation of programmed cell death	Gene Ontology	GO:0043068	1	553	0.826481318142	0.870034059485	AGT
anion transport	Gene Ontology	GO:0006820	1	553	0.826481318142	0.870034059485	SLC7A1i1
neuron projection guidance	Gene Ontology	GO:0097485	1	553	0.826481318142	0.870034059485	ERBB4
modification-dependent macromolecule catabolic process	Gene Ontology	GO:0043632	1	555	0.827575171342	0.870827042437	USP34
RNA polymerase II regulatory region DNA binding	Gene Ontology	GO:0001012	1	556	0.828119509792	0.871041376609	SMAD5
negative regulation of cellular component organization	Gene Ontology	GO:0051129	1	573	0.83711475542	0.879056439264	PRTN3
cation homeostasis	Gene Ontology	GO:0055080	1	576	0.838652572492	0.879565184153	AGT
actin filament-based process	Gene Ontology	GO:0030029	1	579	0.840175873219	0.880462995008	PRKG1
somatodendritic compartment	Gene Ontology	GO:0036477	1	580	0.84068043799	0.880630839795	HCFC1
positive regulation of cell death	Gene Ontology	GO:0010942	1	582	0.841684794604	0.881321875431	AGT
inorganic ion homeostasis	Gene Ontology	GO:0098771	1	588	0.844660040927	0.882061103827	AGT
lymphocyte activation	Gene Ontology	GO:0046649	1	588	0.844660040927	0.882061103827	BMX
cytokine-mediated signaling pathway	Gene Ontology	GO:0019221	1	589	0.845150451457	0.882061103827	ZCCHC11
chordate embryonic development	Gene Ontology	GO:0043009	1	591	0.84612663346	0.882359625512	HSPG2
embryo development ending in birth or egg hatching	Gene Ontology	GO:0009792	1	598	0.849495070104	0.883548064838	HSPG2
RNA polymerase II transcription factor activity, sequence-specific DNA binding	Gene Ontology	GO:0000981	1	599	0.849970218826	0.883548064838	HCFC1
[truncated: 42 more rows]
